# Supplementary material for: Trends in treatment-seeking for fever in children under five years old in 151 countries from 1990 to 2020
Source: PubMed Central journal article supplement (PMC10446233; doi:10.1371/journal.pgph.0002134), 2023-08-23

**Southeast Asia: China, CHN**

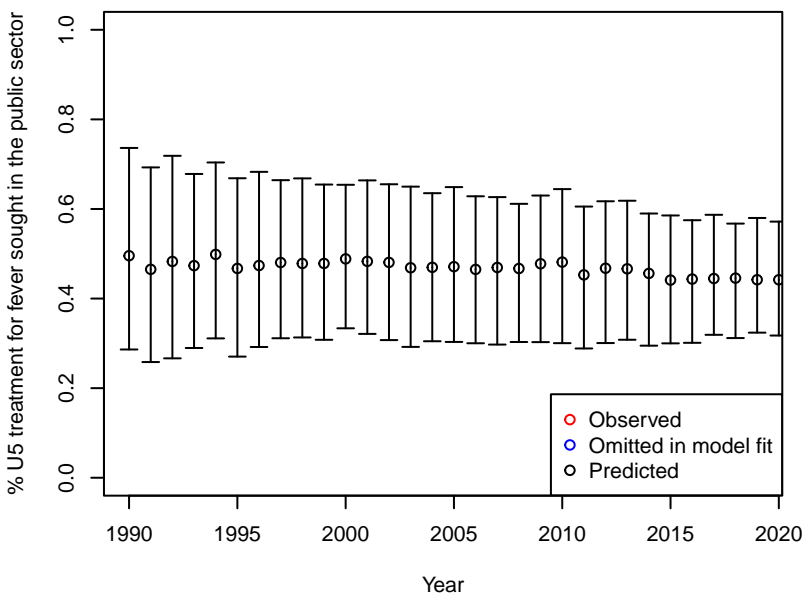

**Southeast Asia: North Korea, PRK**

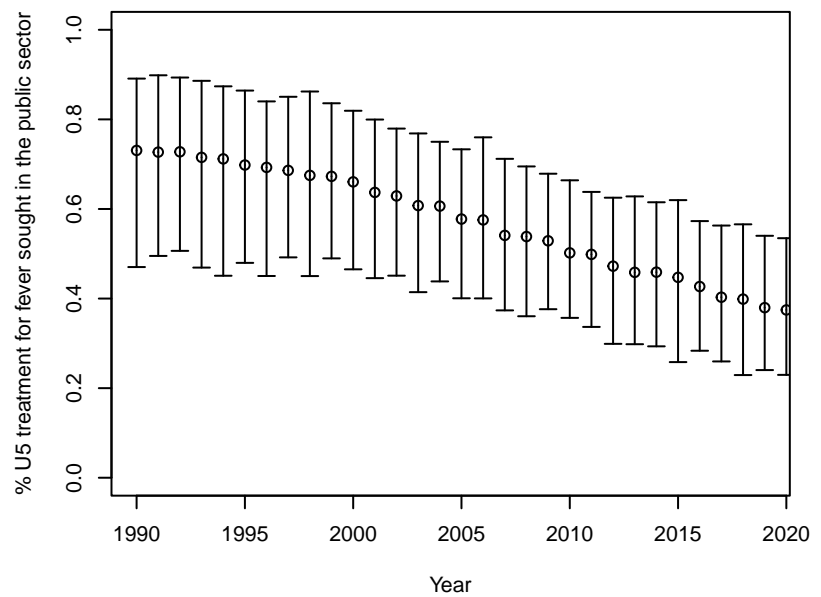

**Southeast Asia: Taiwan, TWN**

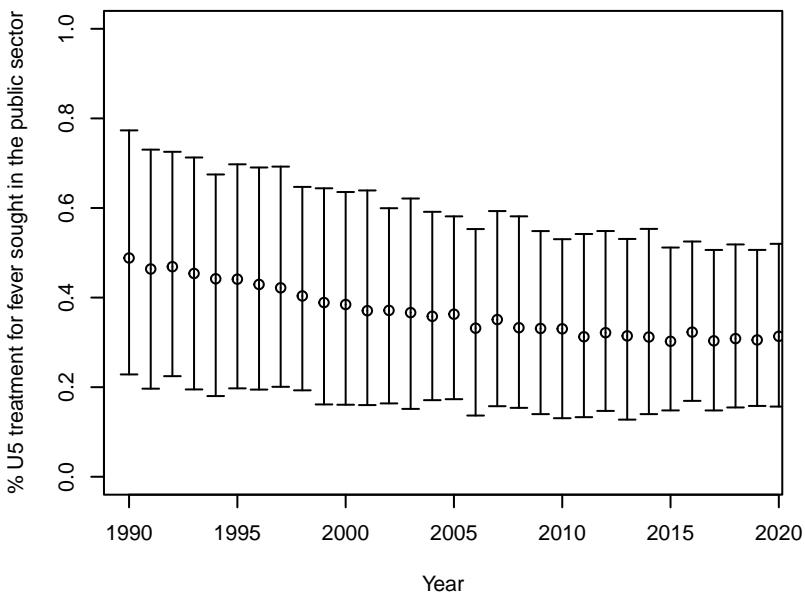

**Southeast Asia: Cambodia, KHM**

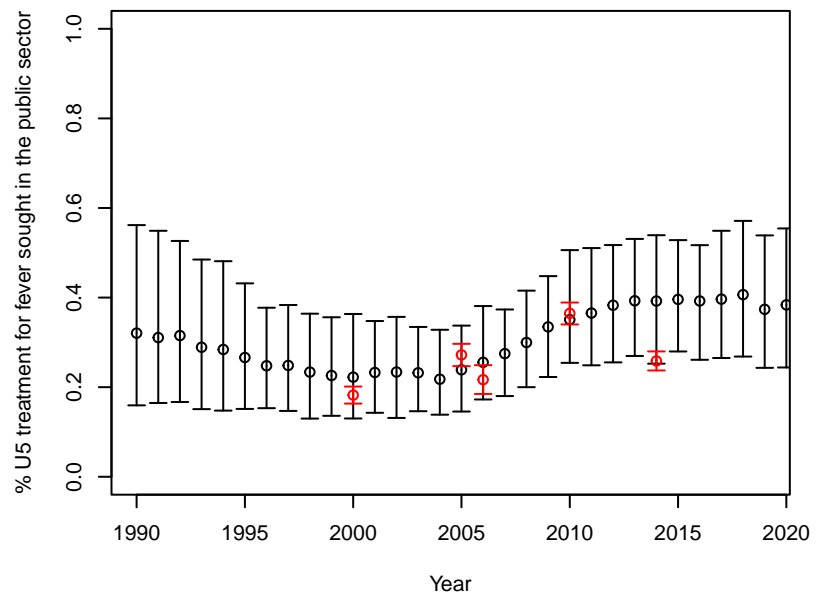

**Southeast Asia: Indonesia, IDN**

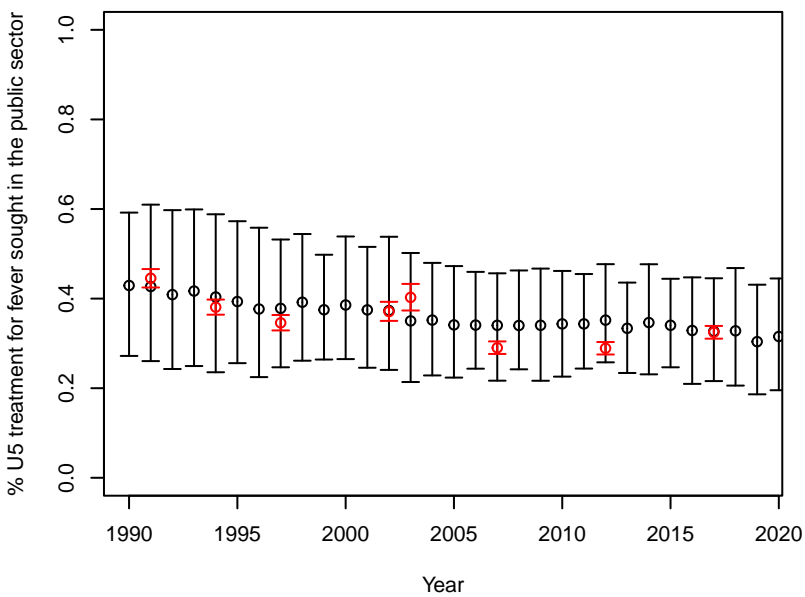

**Southeast Asia: Laos, LAO**

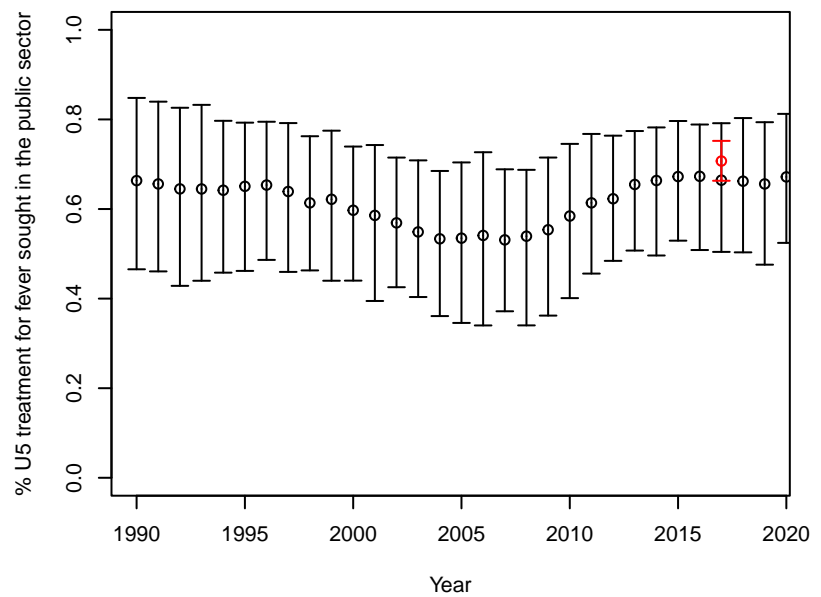

**Southeast Asia: Malaysia, MYS**

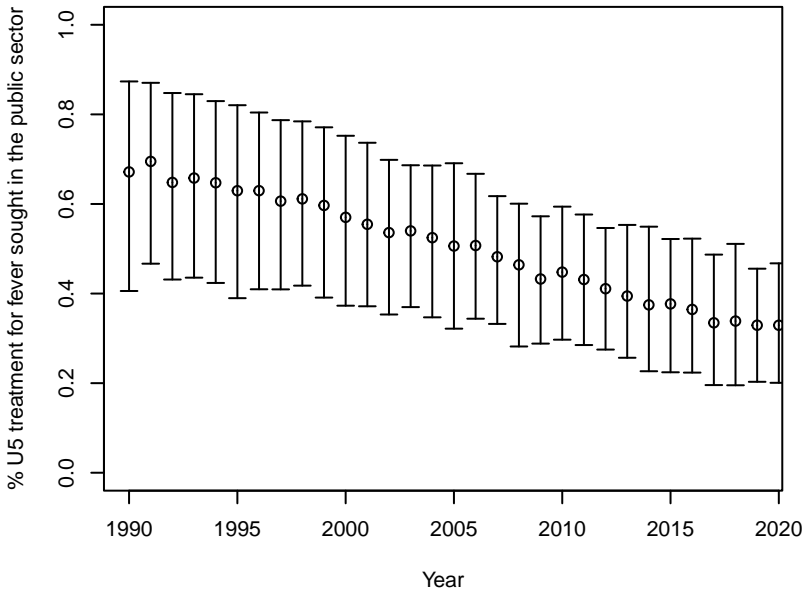

**Southeast Asia: Maldives, MDV**

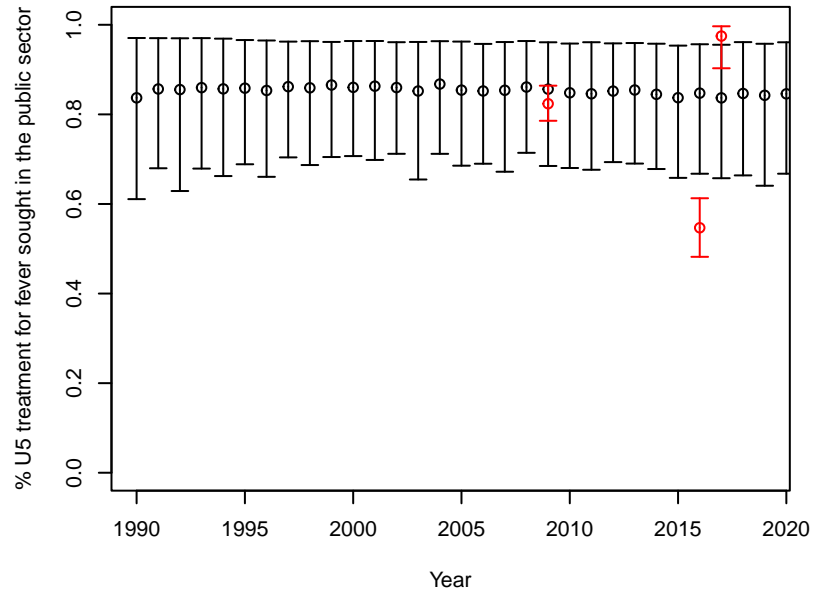

**Southeast Asia: Myanmar, MMR**

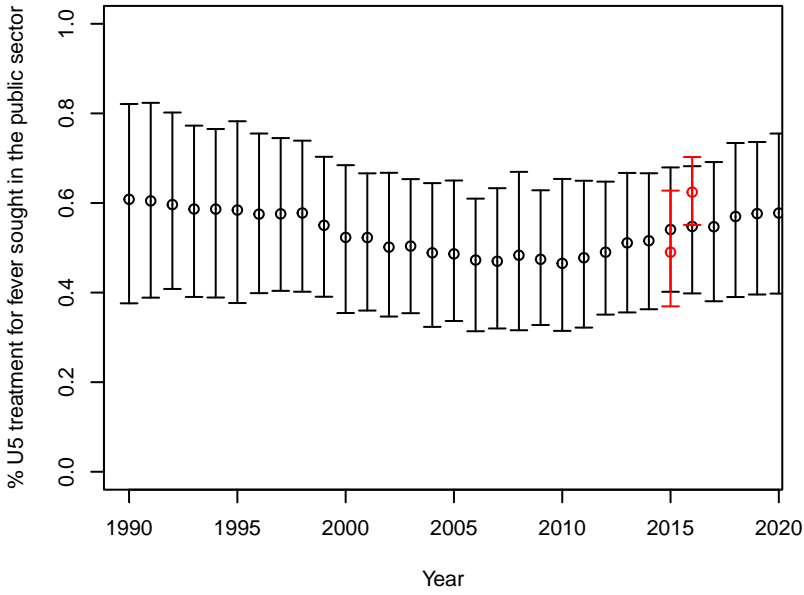

**Southeast Asia: Philippines, PHL**

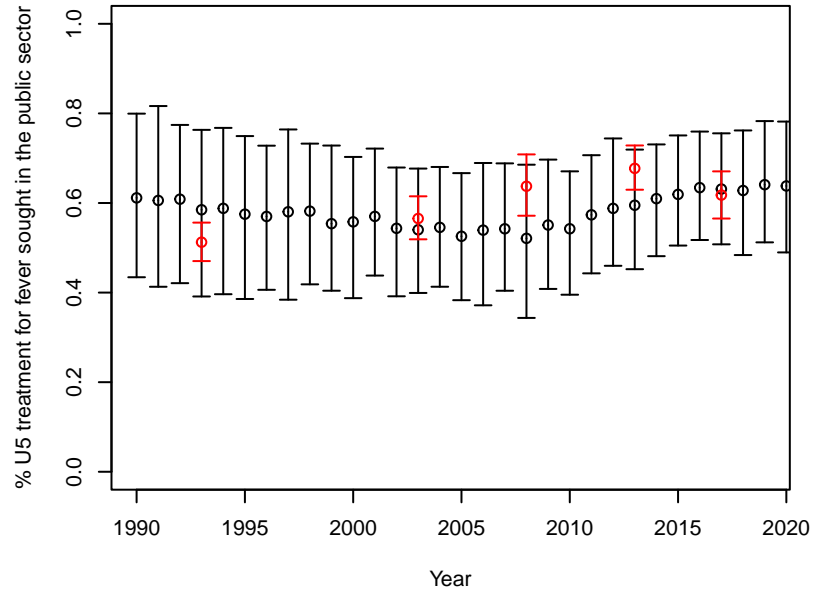

**Southeast Asia: Sri Lanka, LKA**

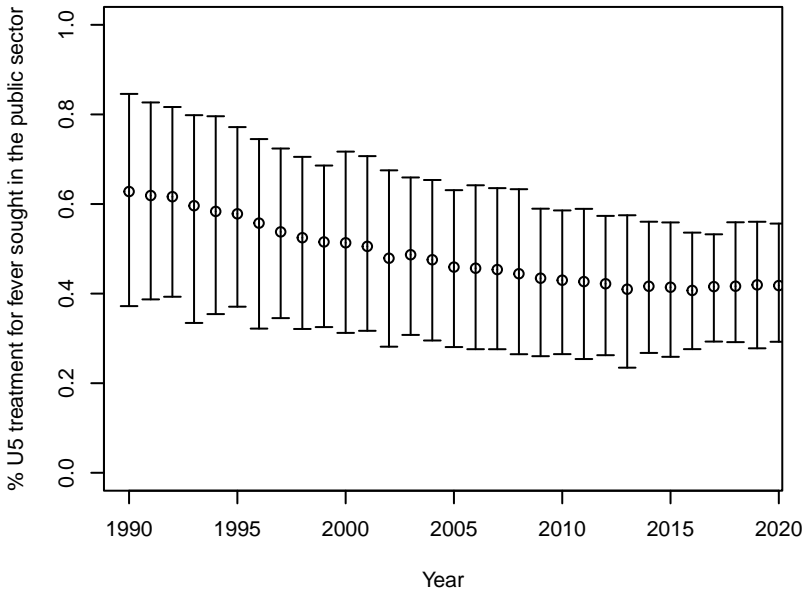

**Southeast Asia: Thailand, THA**

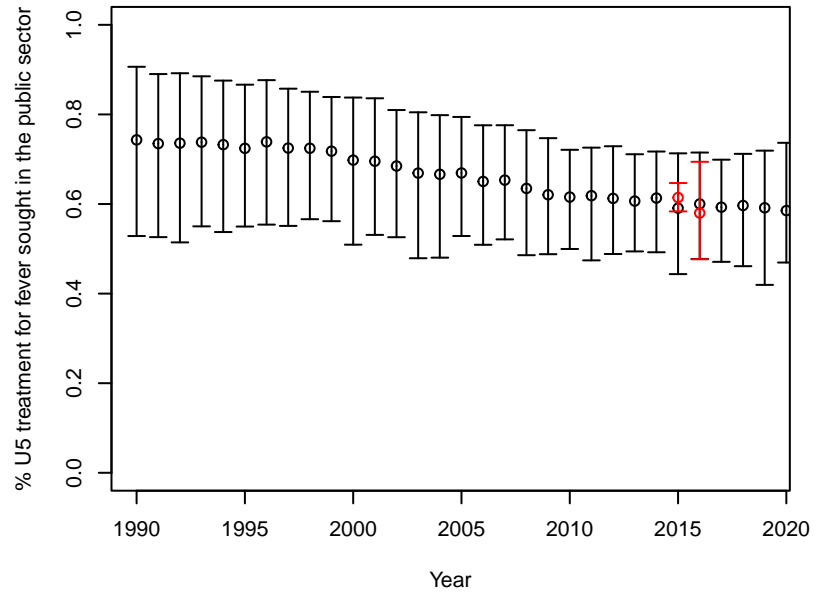

**Southeast Asia: Timor-Leste, TLS**

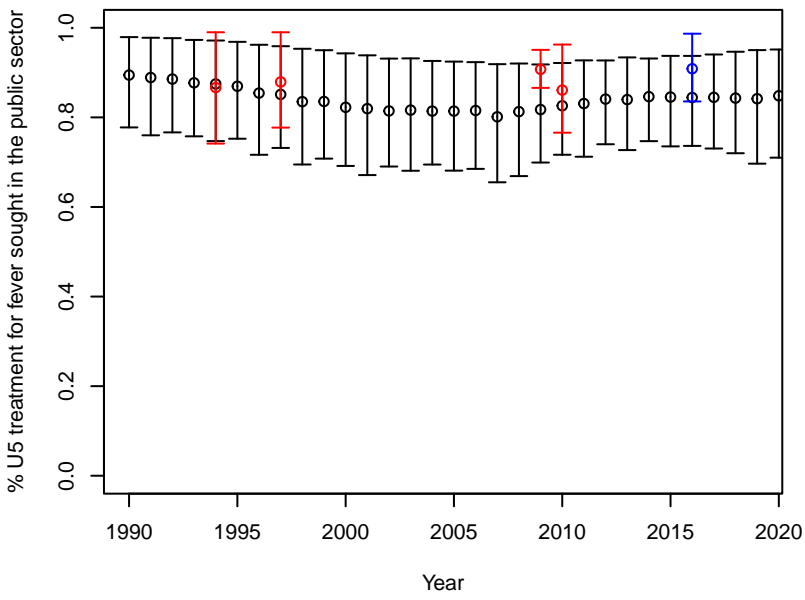

**Southeast Asia: Vietnam, VNM**

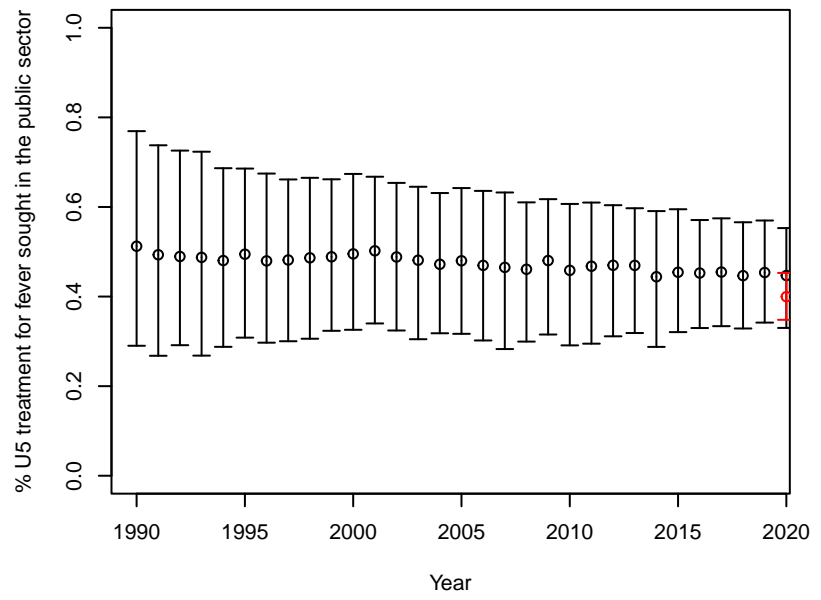

**Southeast Asia: Brunei, BRN**

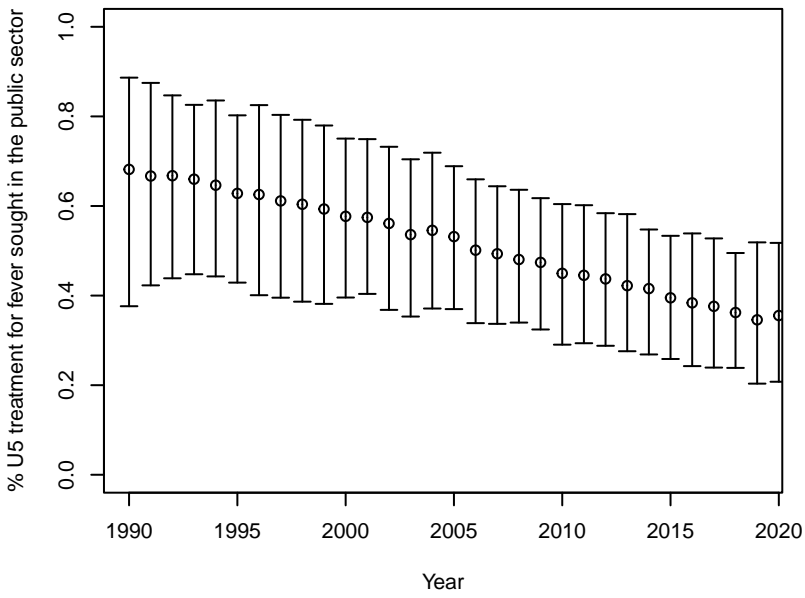

**Southeast Asia: Japan, JPN**

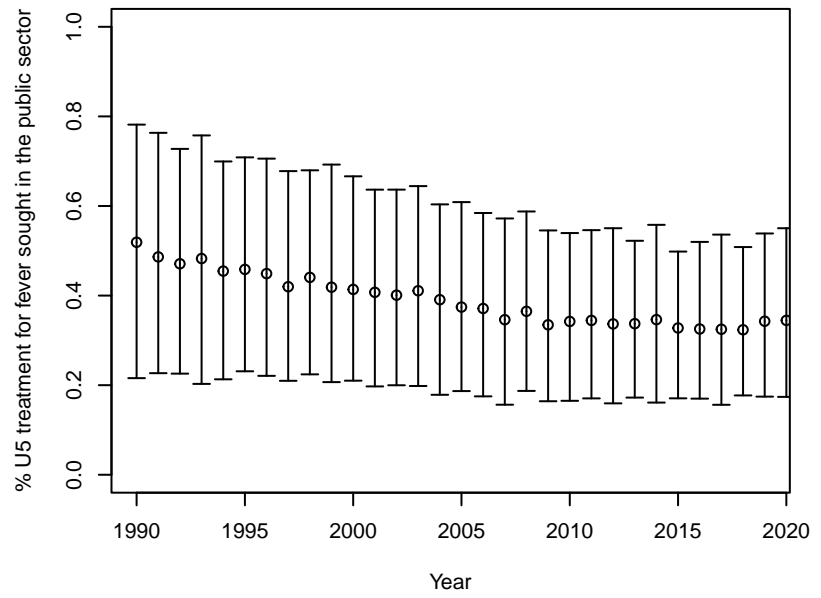

**Southeast Asia: South Korea, KOR**

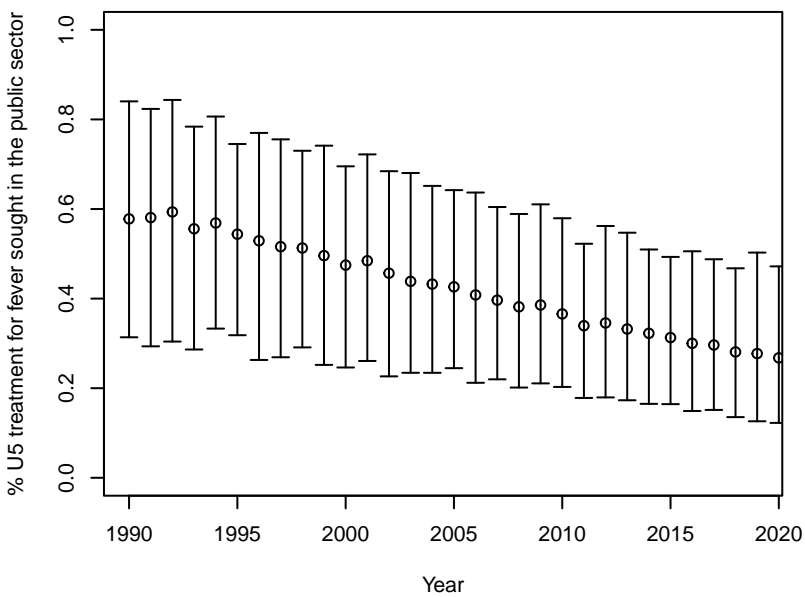

**Southeast Asia: Singapore, SGP**

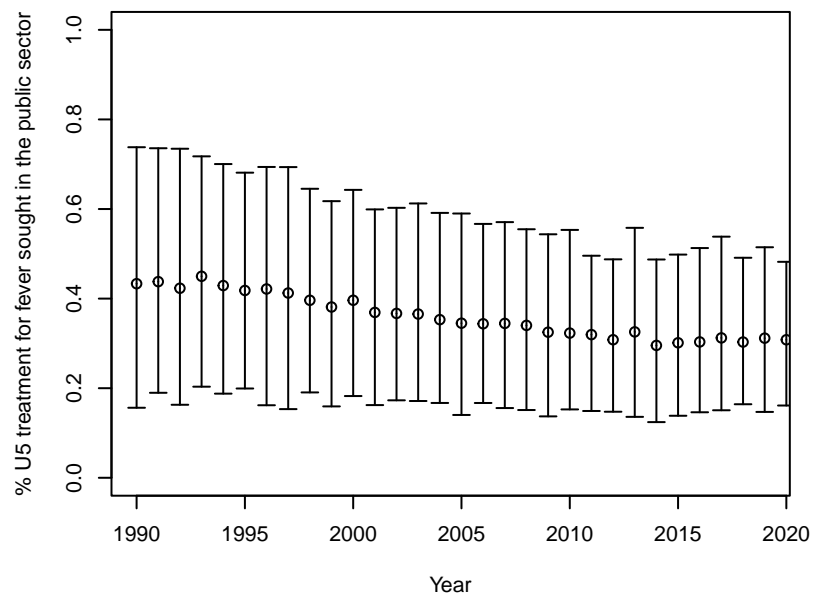

**Southeast Asia: Mauritius, MUS**

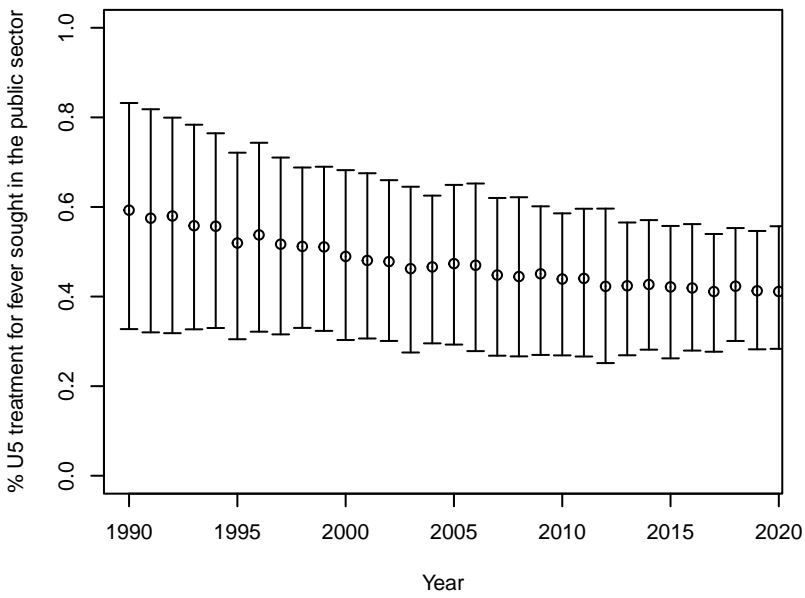

**Southeast Asia: Seychelles, SYC**

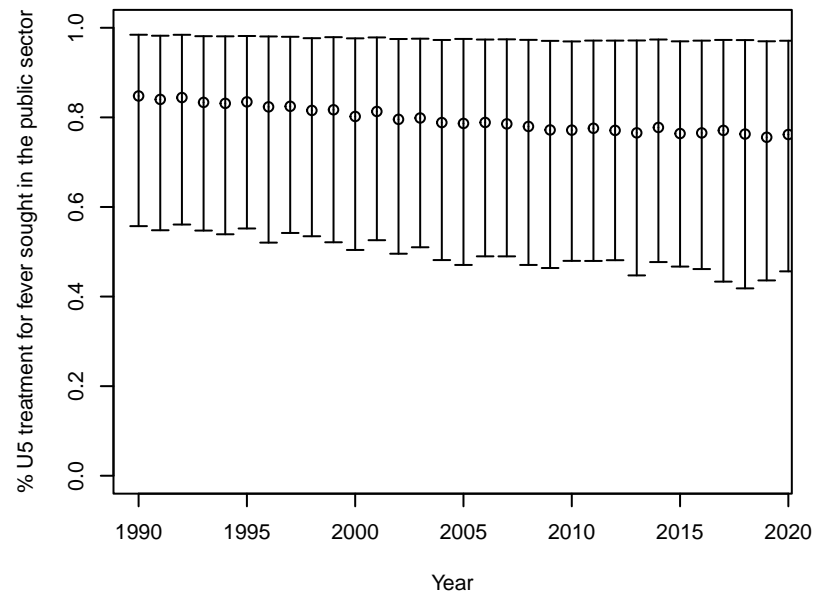

**Oceania: Fiji, FJI**

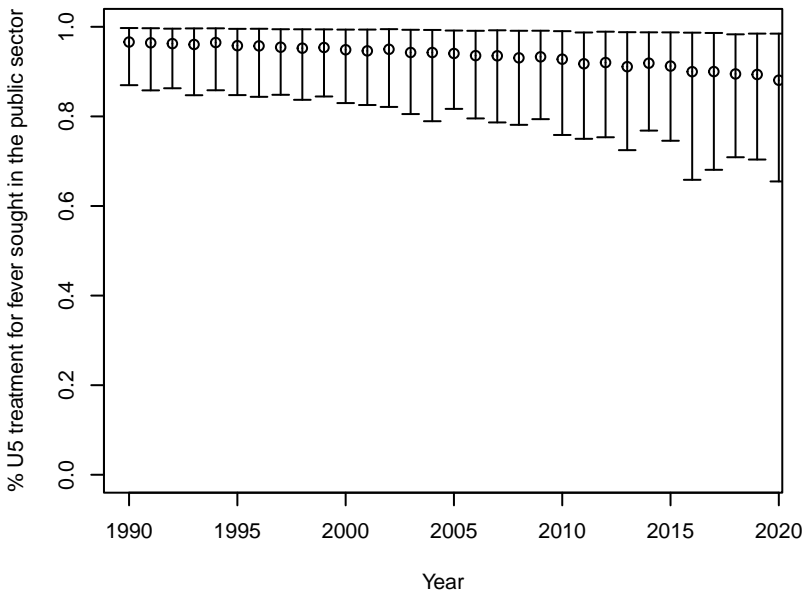

**Oceania: Kiribati, KIR**

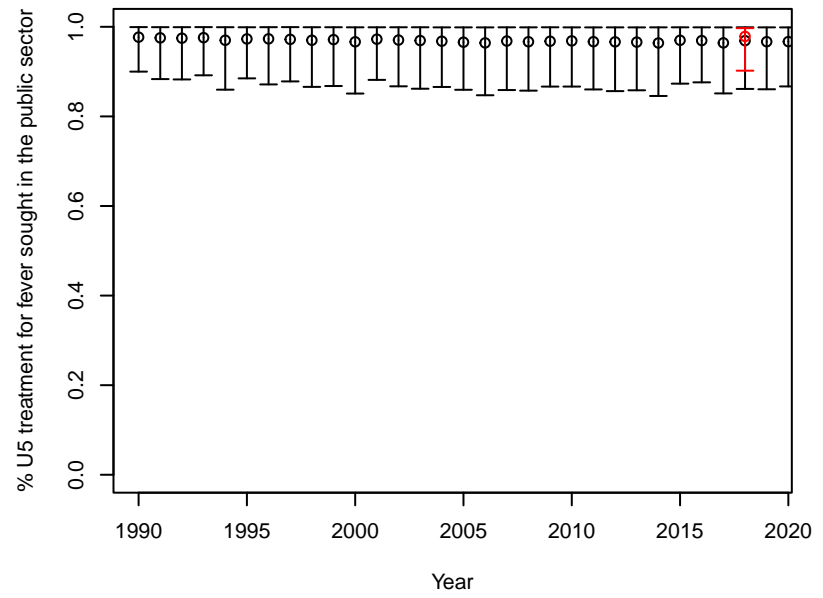

**Oceania: Marshall Islands, MHL**

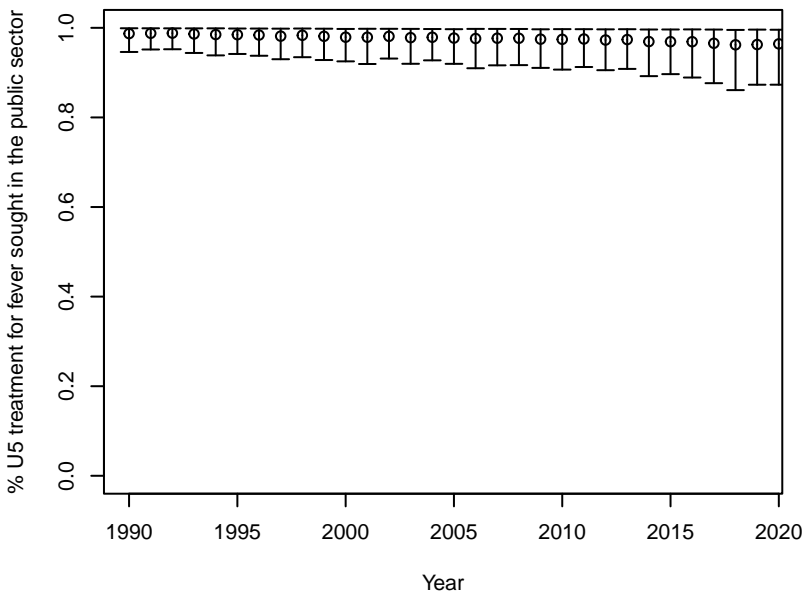

**Oceania: Federated States of Micronesia, FSM**

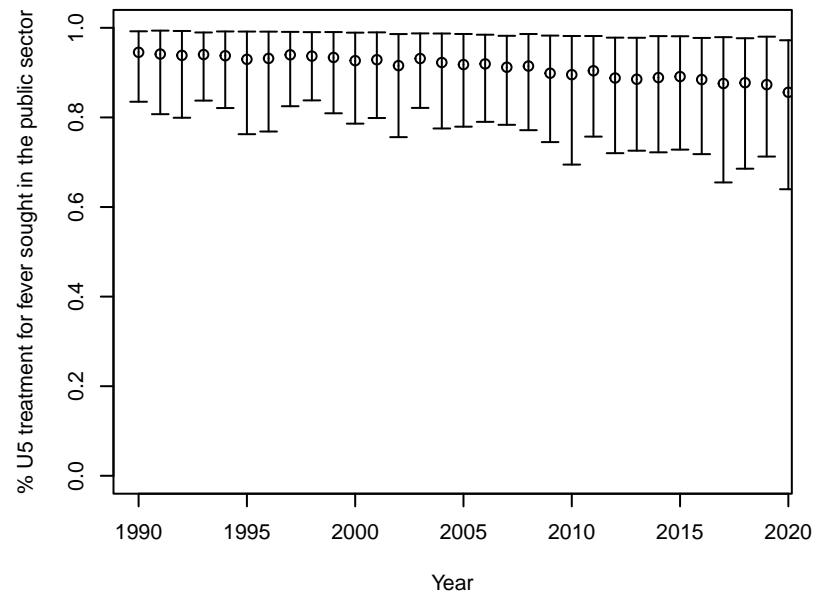

**Oceania: Papua New Guinea, PNG**

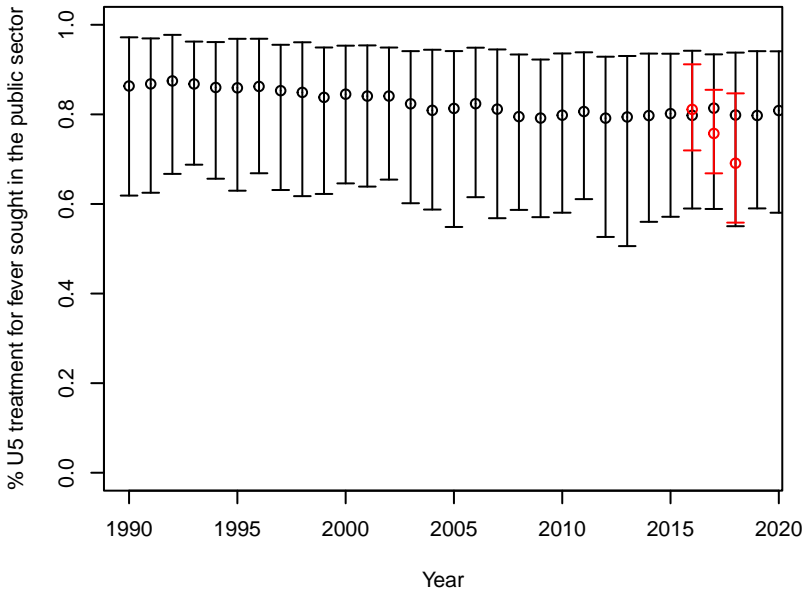

**Oceania: Samoa, WSM**

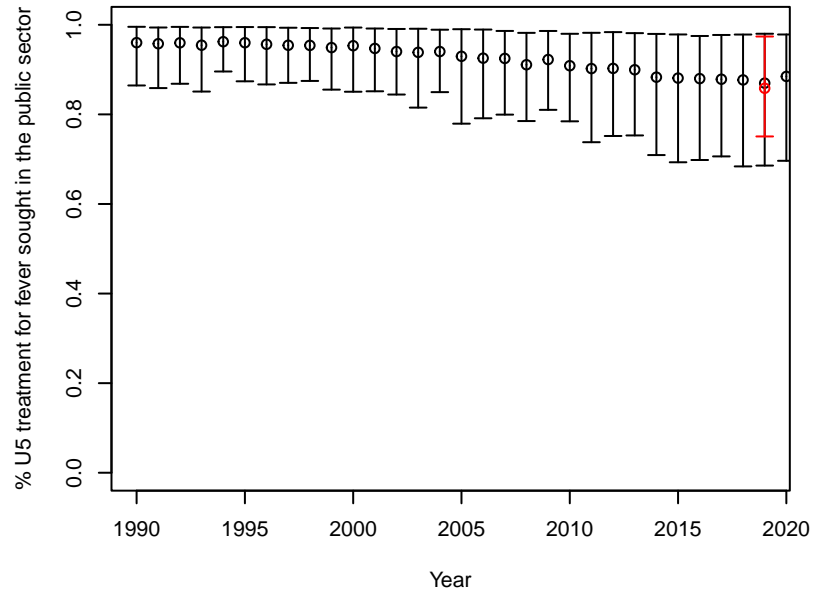

**Oceania: Solomon Islands, SLB**

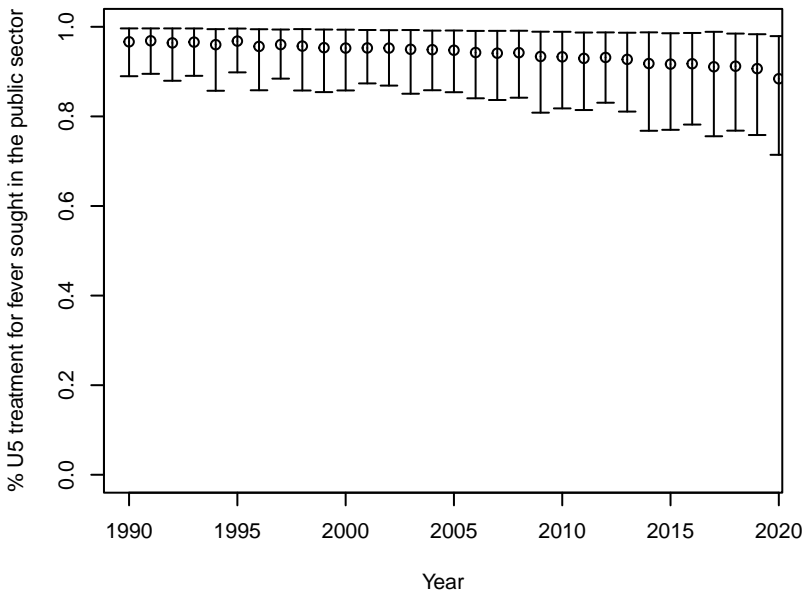

**Oceania: Tonga, TON**

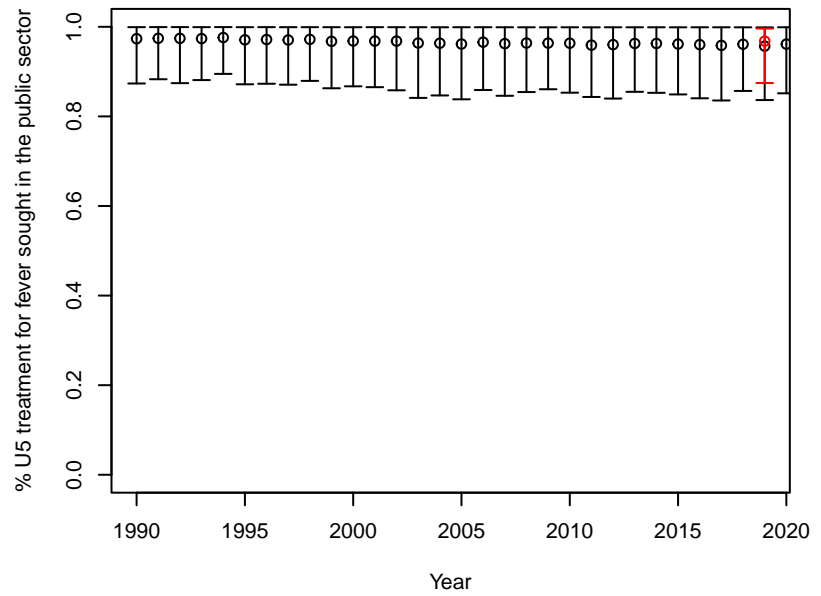

**Oceania: Vanuatu, VUT**

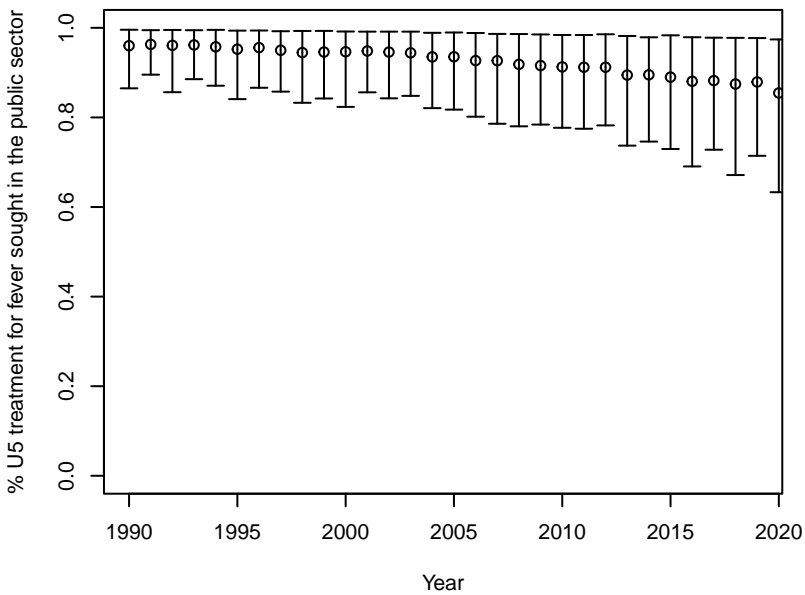

**Oceania: Cook Islands, COK**

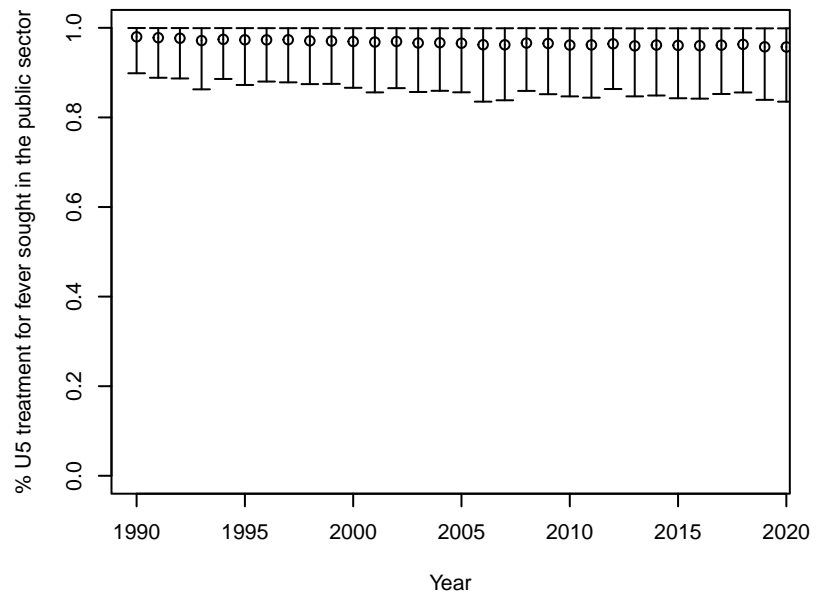

Oceania: Nauru, NRU

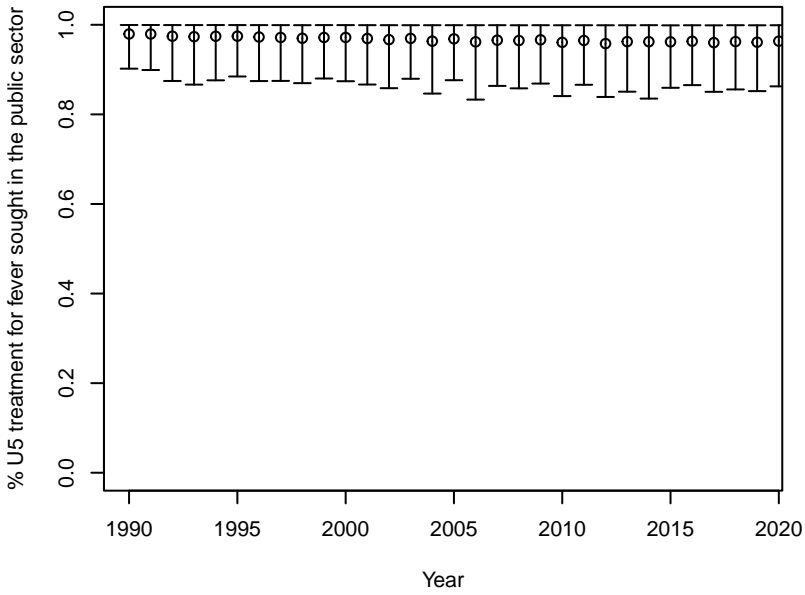

Oceania: Niue, NIU

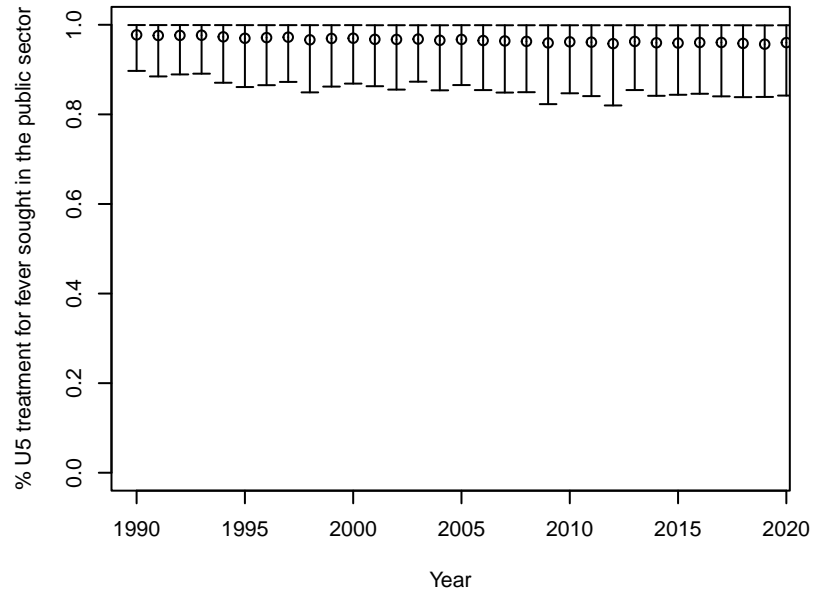

Oceania: Palau, PLW

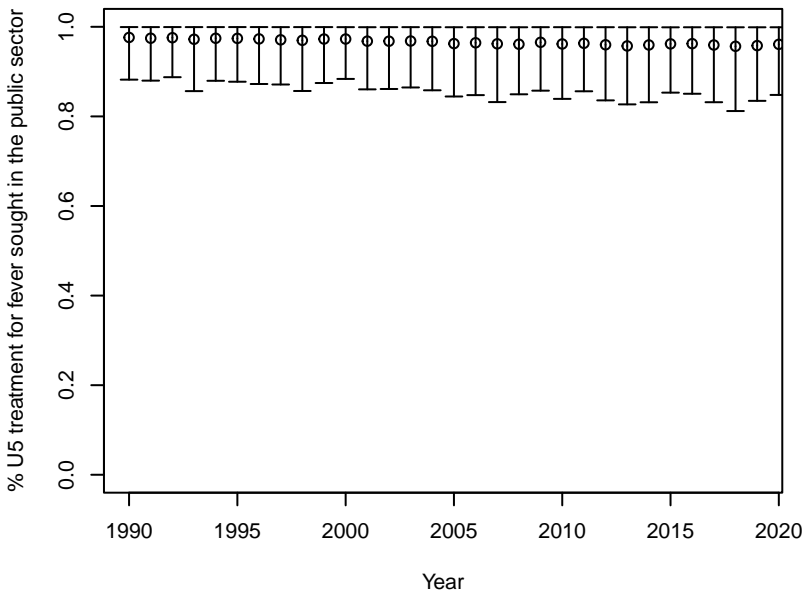

Oceania: Tokelau, TKL

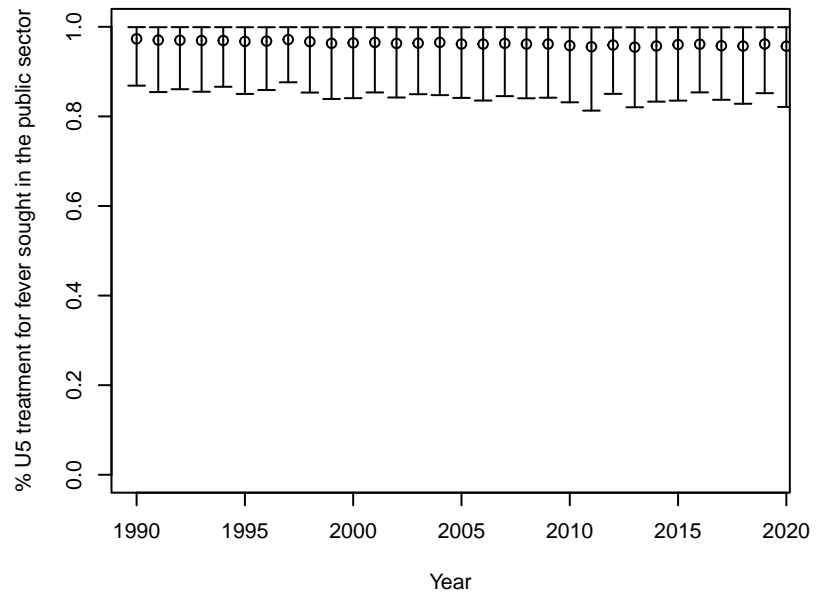

Oceania: Tuvalu, TUV

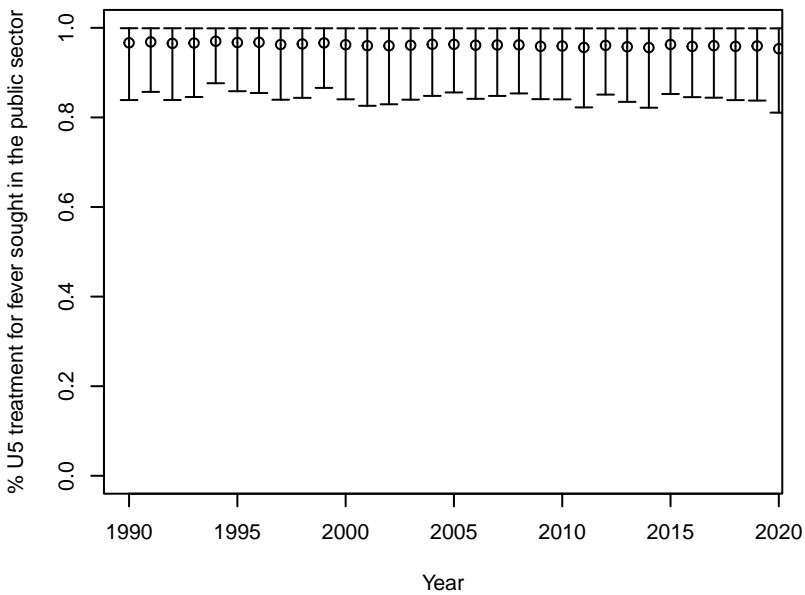

Central Asia: Armenia, ARM

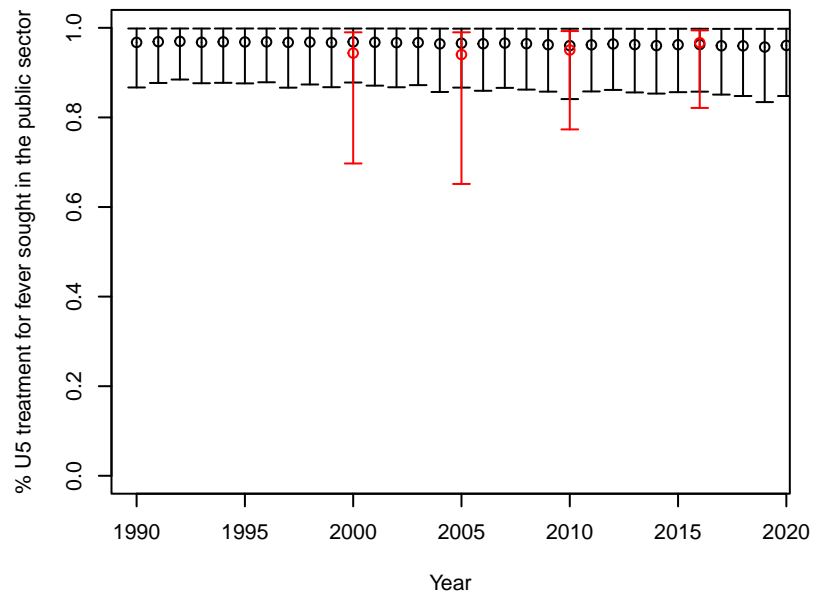

**Central Asia: Azerbaijan, AZE**

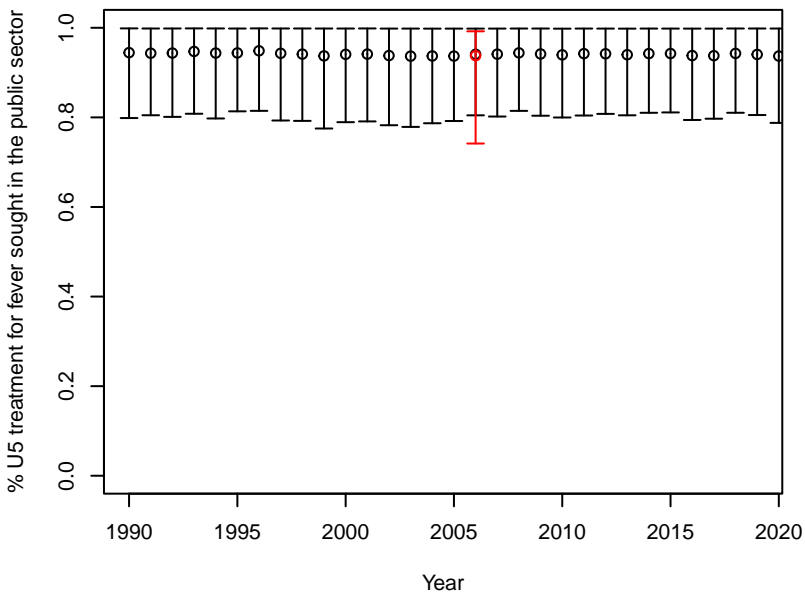

**Central Asia: Georgia, GEO**

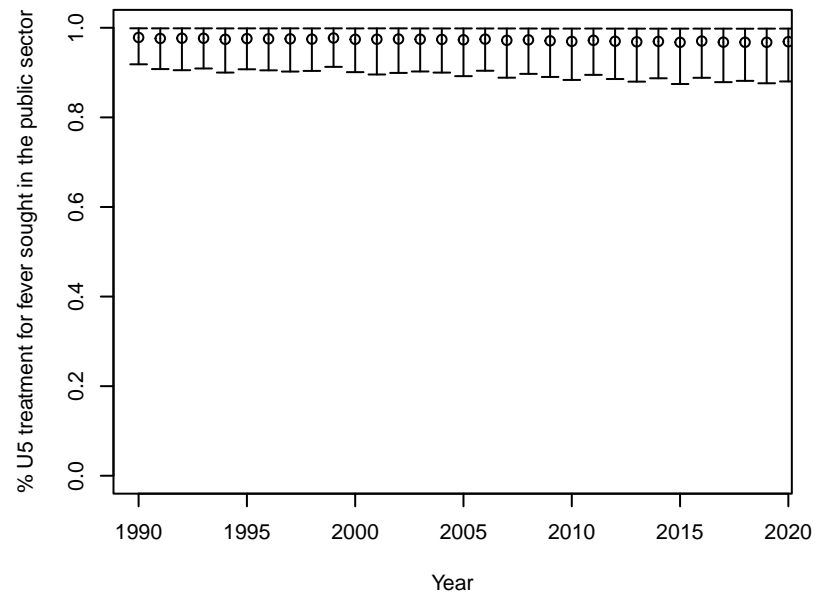

**Central Asia: Kazakhstan, KAZ**

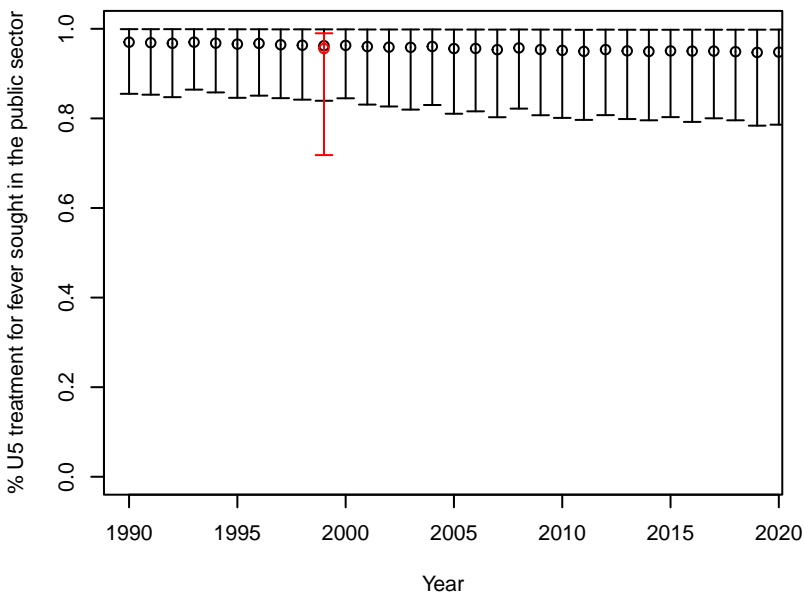

**Central Asia: Kyrgyzstan, KGZ**

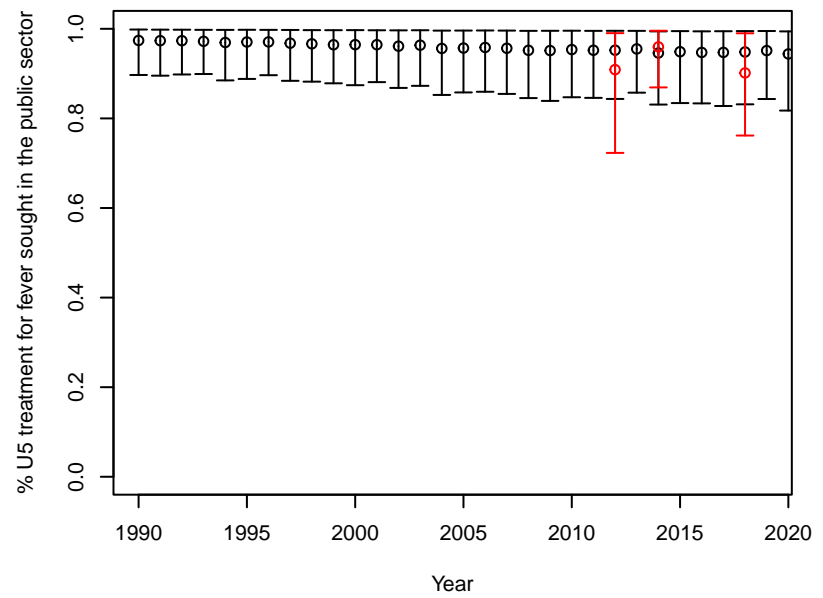

**Central Asia: Mongolia, MNG**

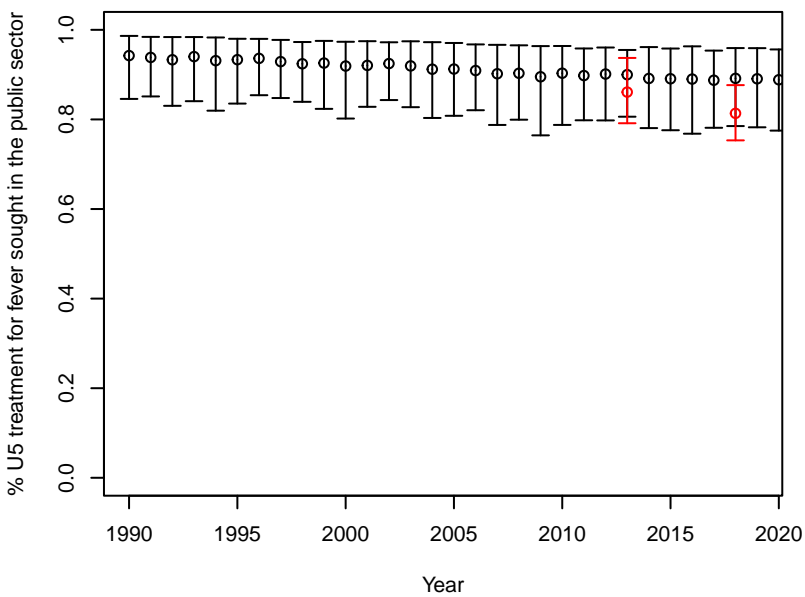

**Central Asia: Tajikistan, TJK**

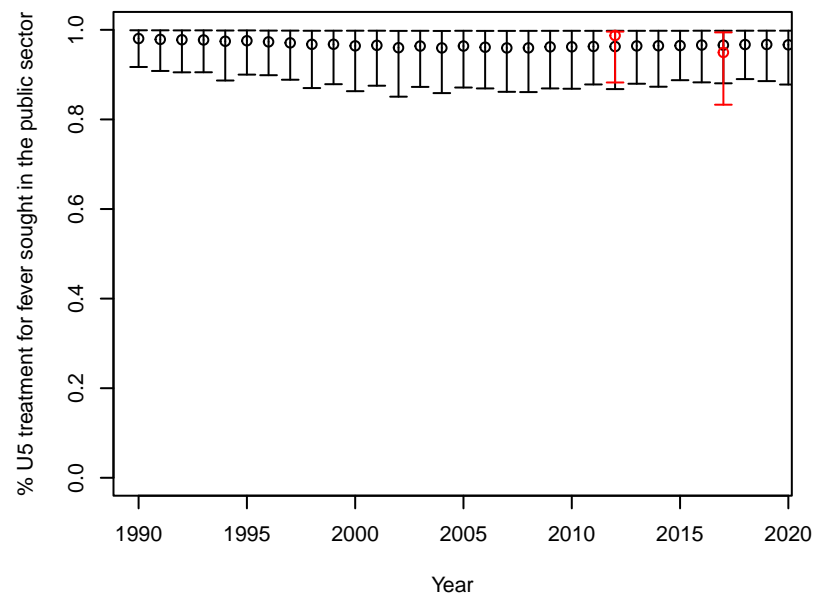

**Central Asia: Turkmenistan, TKM**

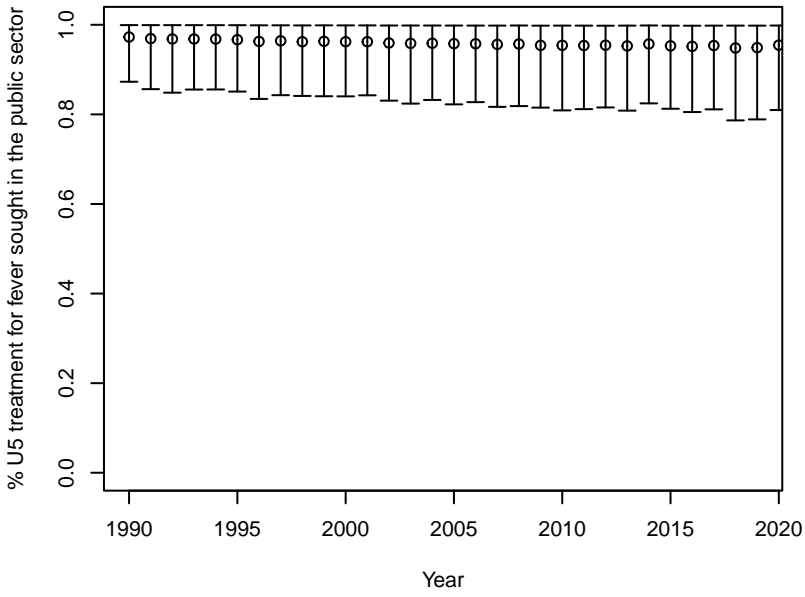

**Central Asia: Uzbekistan, UZB**

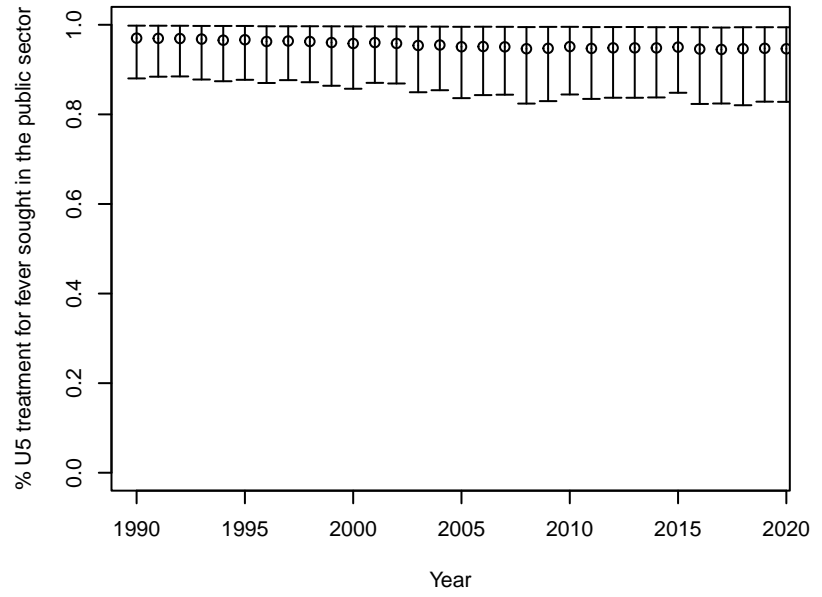

**Tropical Latin America: Argentina, ARG**

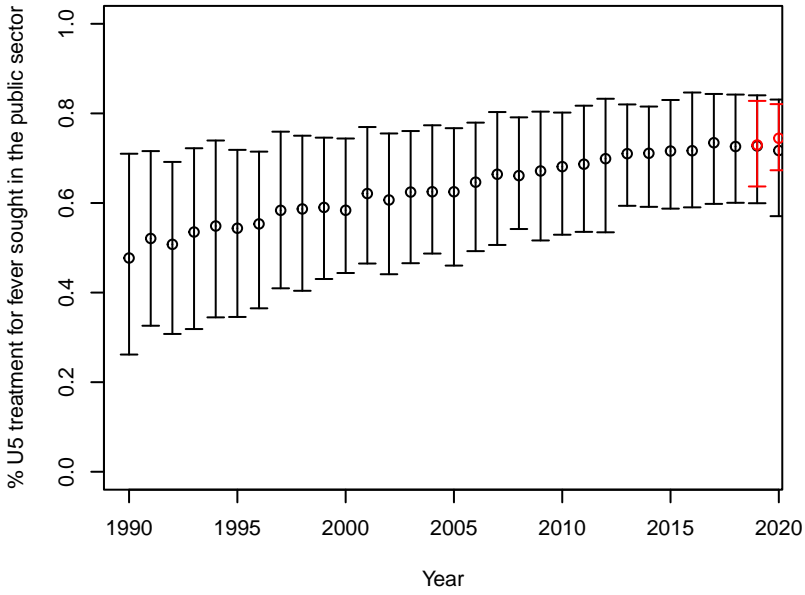

**Tropical Latin America: Chile, CHL**

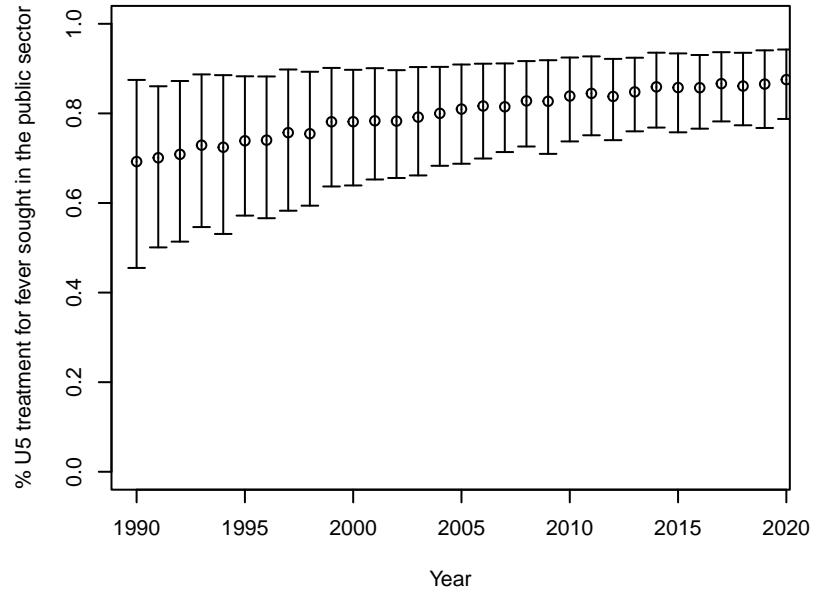

**Tropical Latin America: Uruguay, URY**

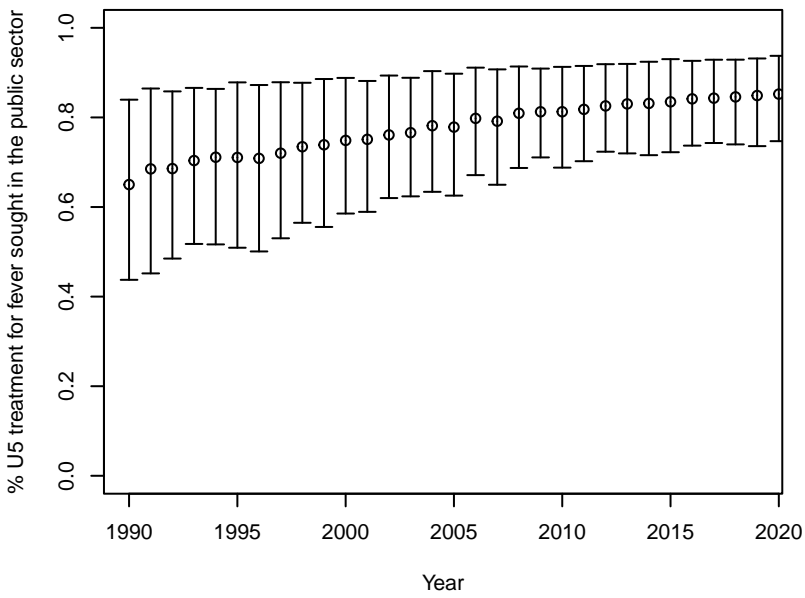

**Tropical Latin America: Brazil, BRA**

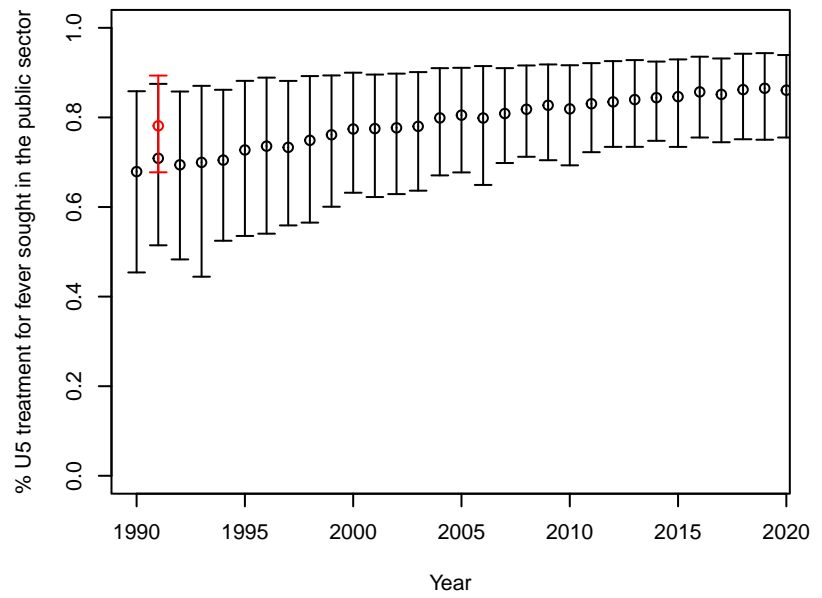



**Tropical Latin America: Paraguay, PRY**

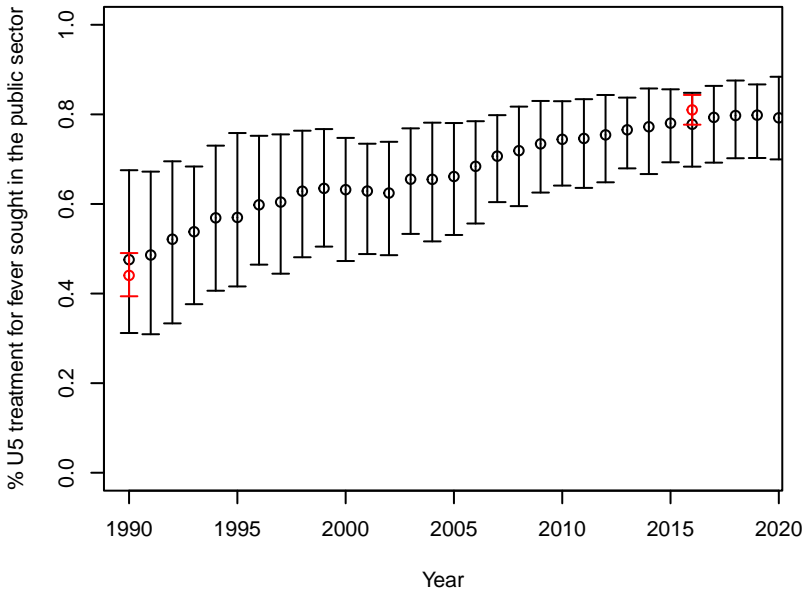

**Caribbean: Antigua and Barbuda, ATG**

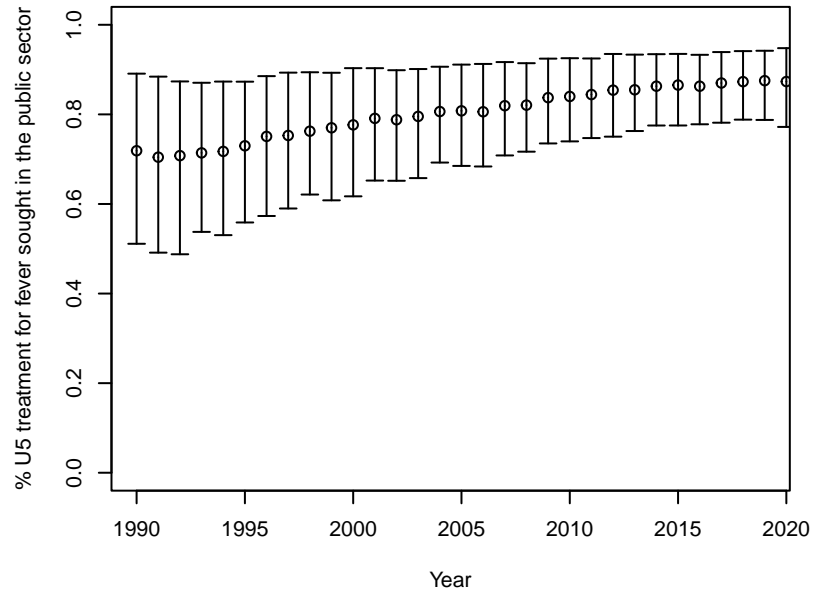

**Caribbean: The Bahamas, BHS**

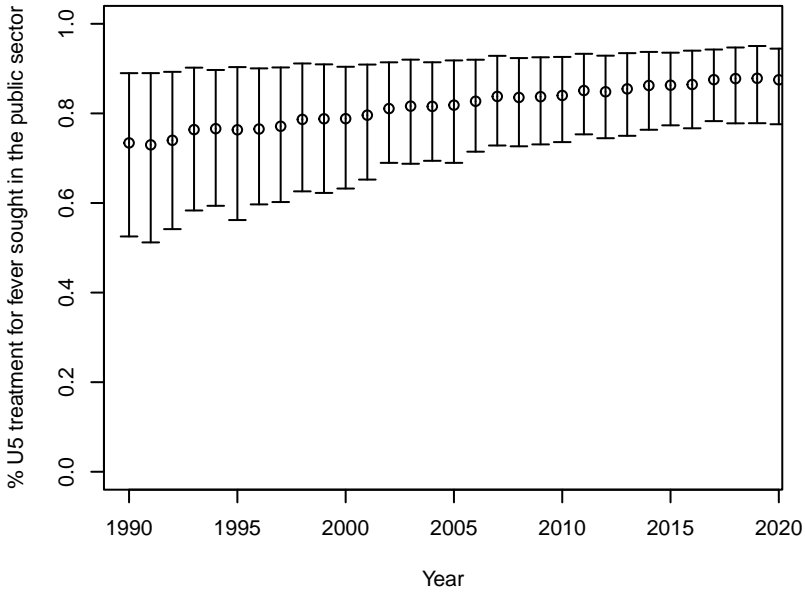

**Caribbean: Barbados, BRB**

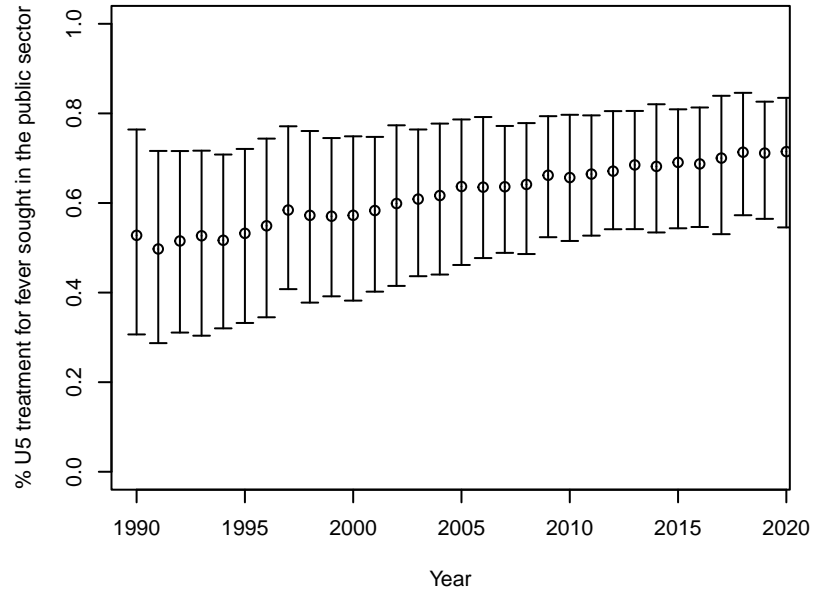

**Caribbean: Belize, BLZ**

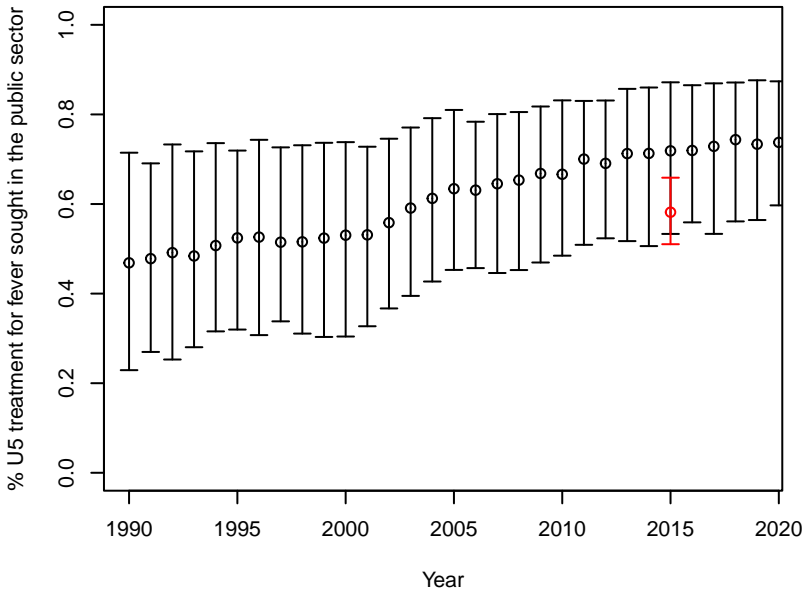

**Caribbean: Cuba, CUB**

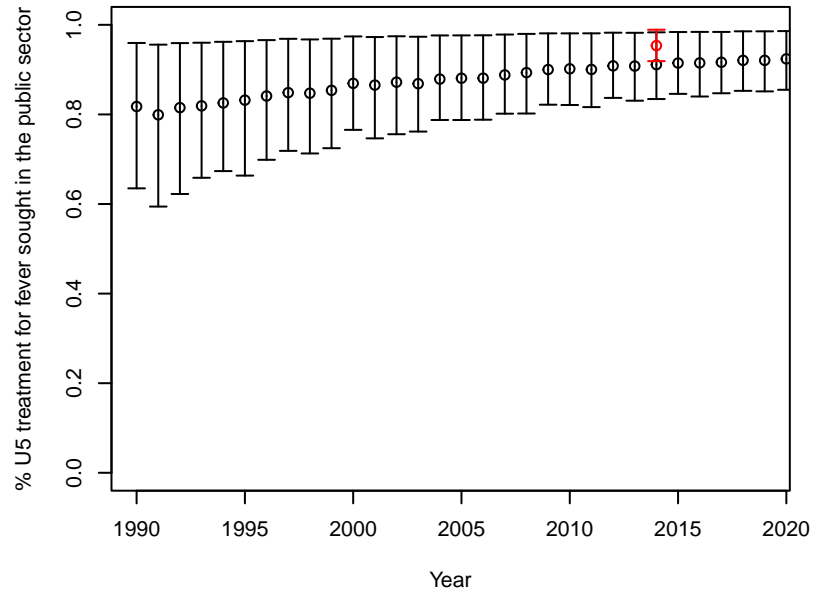

**Caribbean: Dominica, DMA**

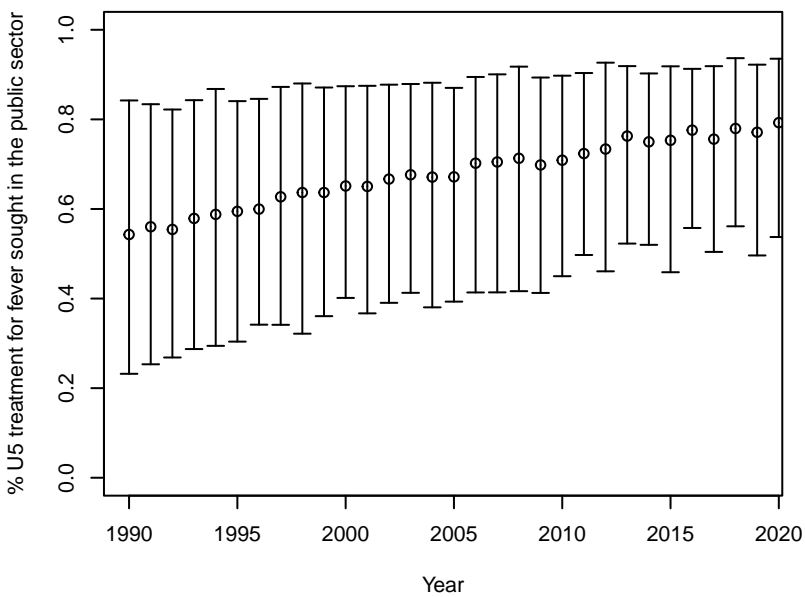

**Caribbean: Dominican Republic, DOM**

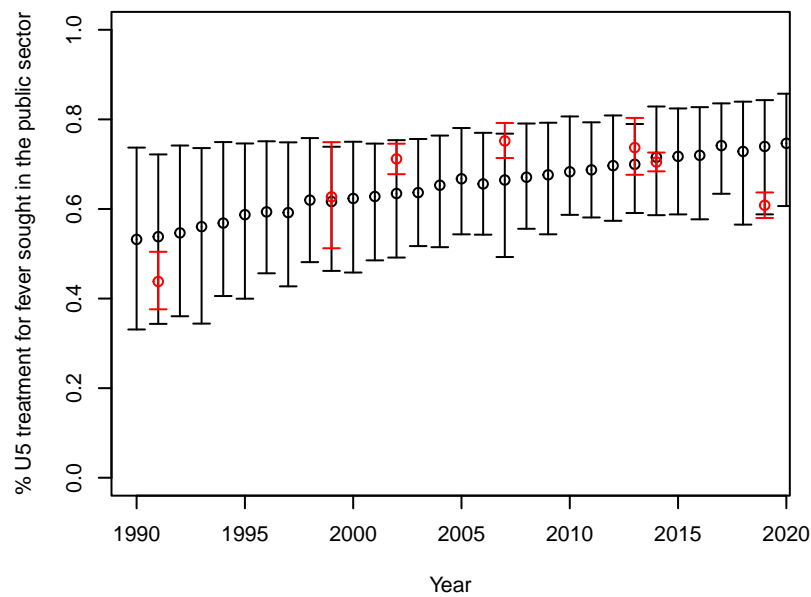

**Caribbean: Grenada, GRD**

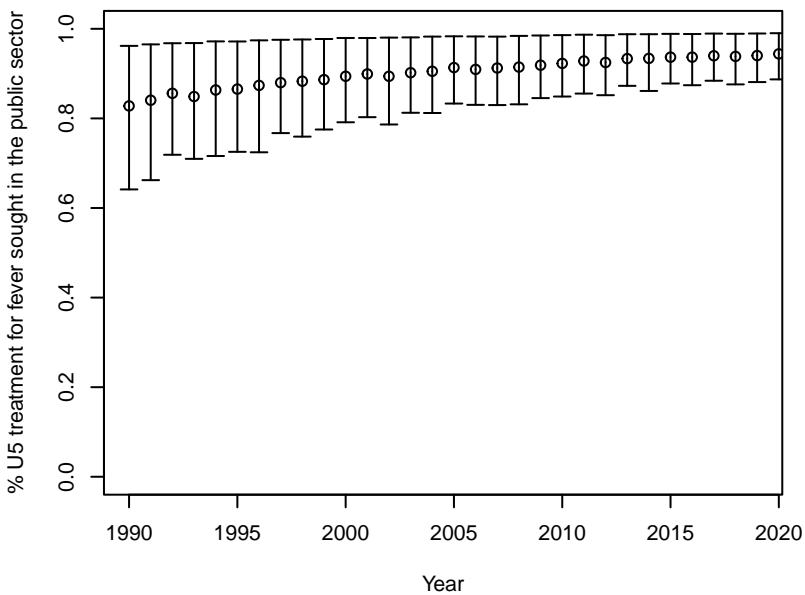

**Caribbean: Guyana, GUY**

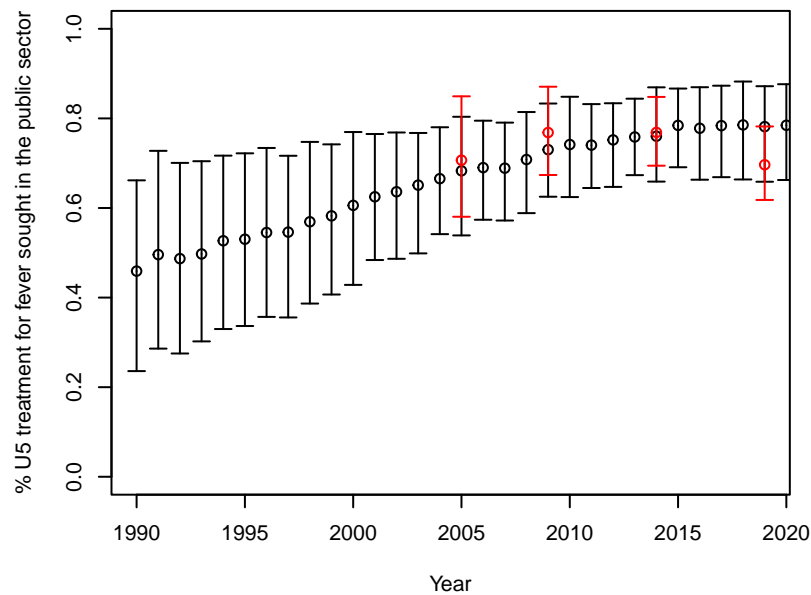

**Caribbean: Haiti, HTI**

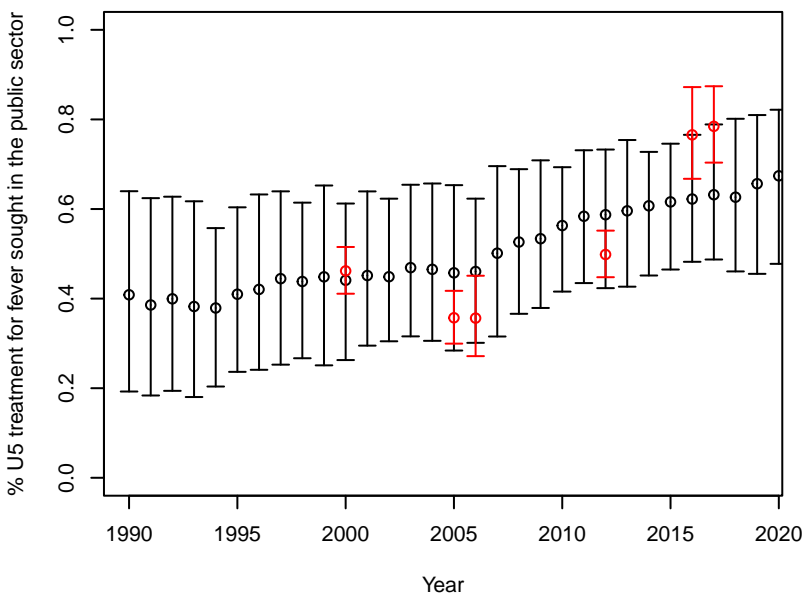

**Caribbean: Jamaica, JAM**

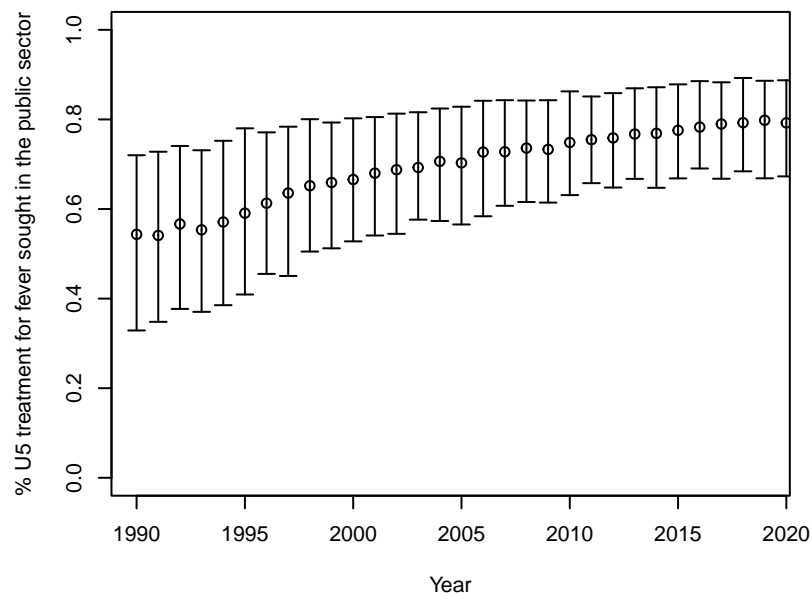

**Caribbean: Saint Lucia, LCA**

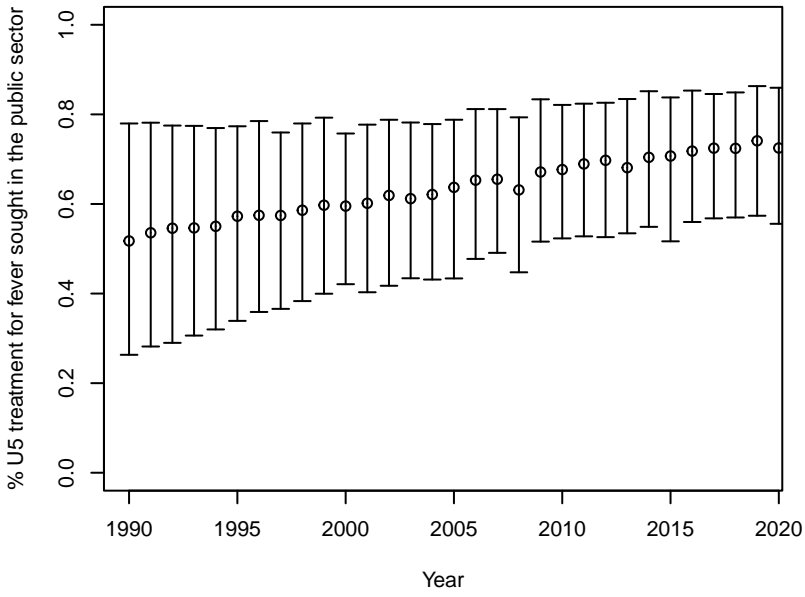

**Caribbean: Saint Vincent and the Grenadines, VCT**

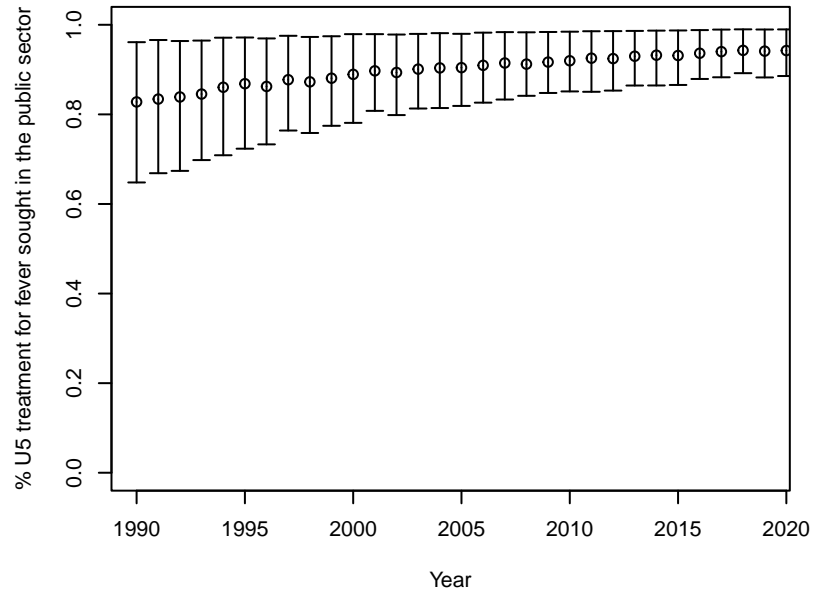

**Caribbean: Suriname, SUR**

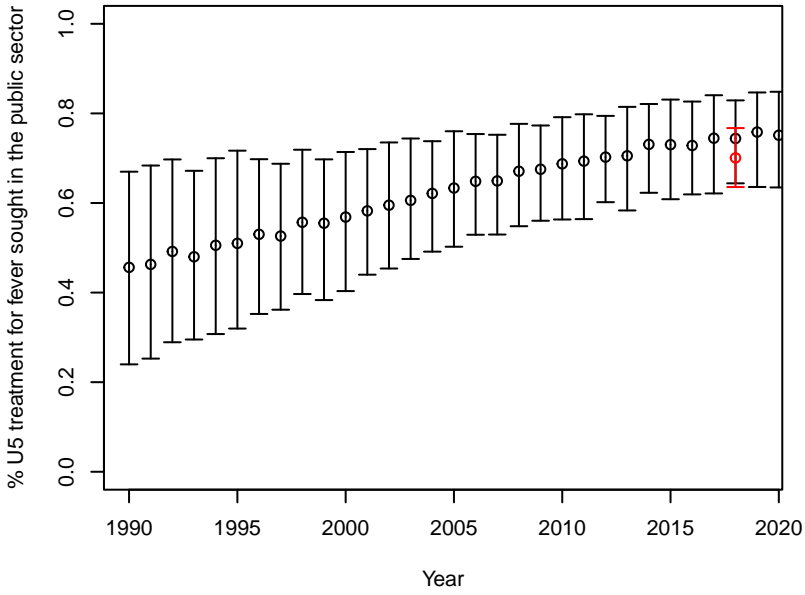

**Caribbean: Trinidad and Tobago, TTO**

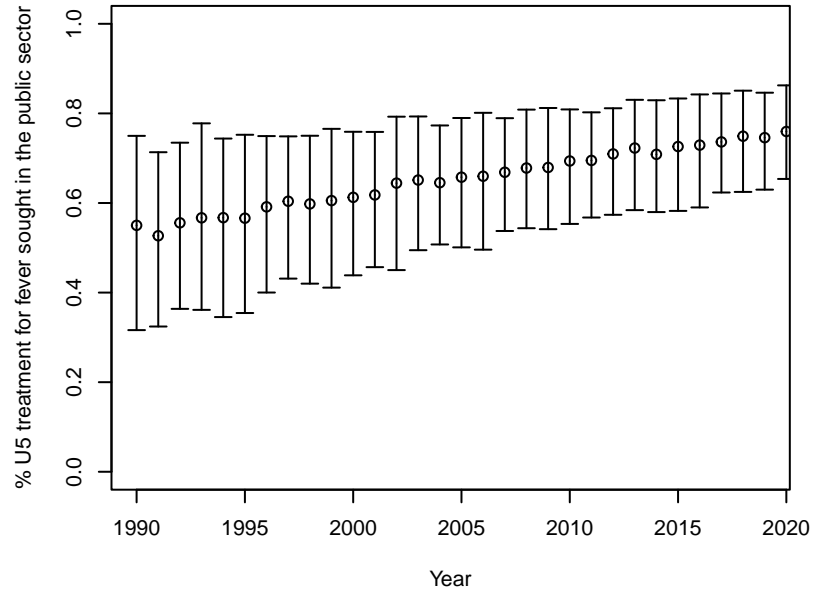

**Caribbean: French Guiana, GUF**

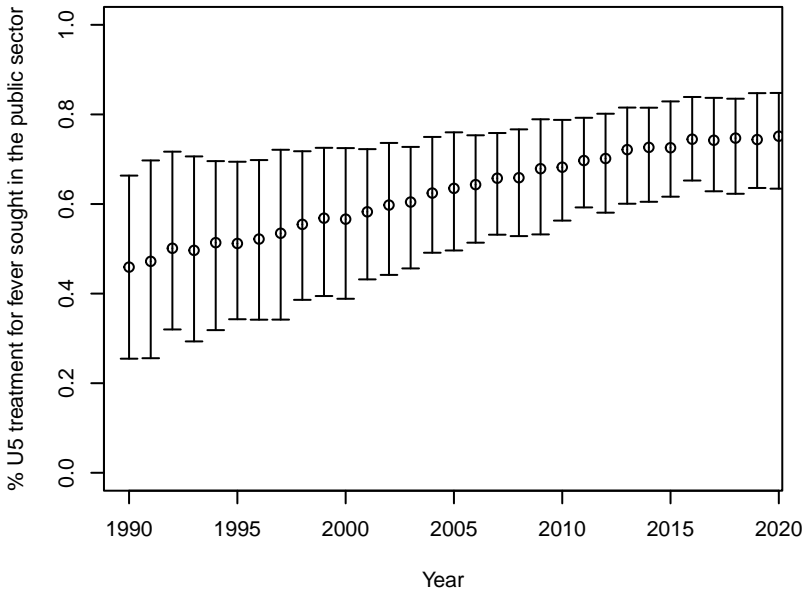

**Caribbean: Saint Kitts and Nevis, KNA**

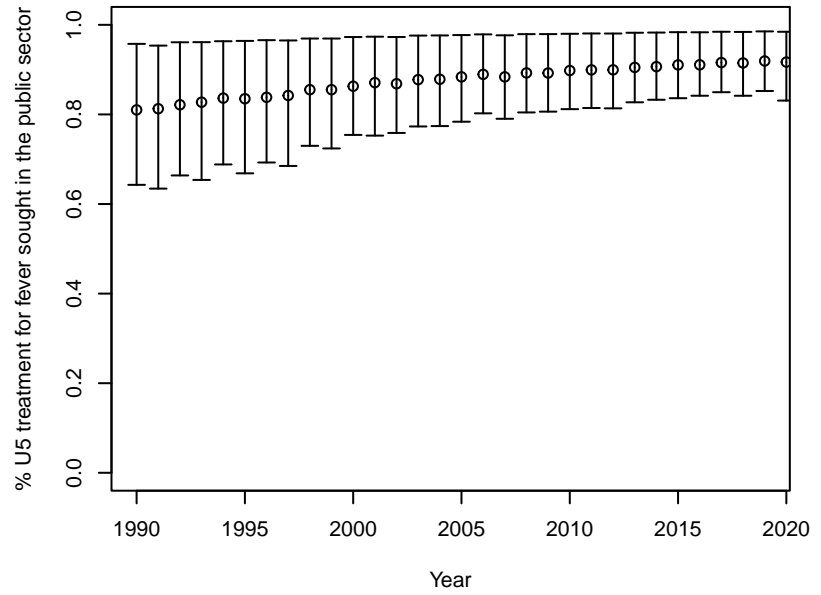

**Andean Latin America: Bolivia, BOL**

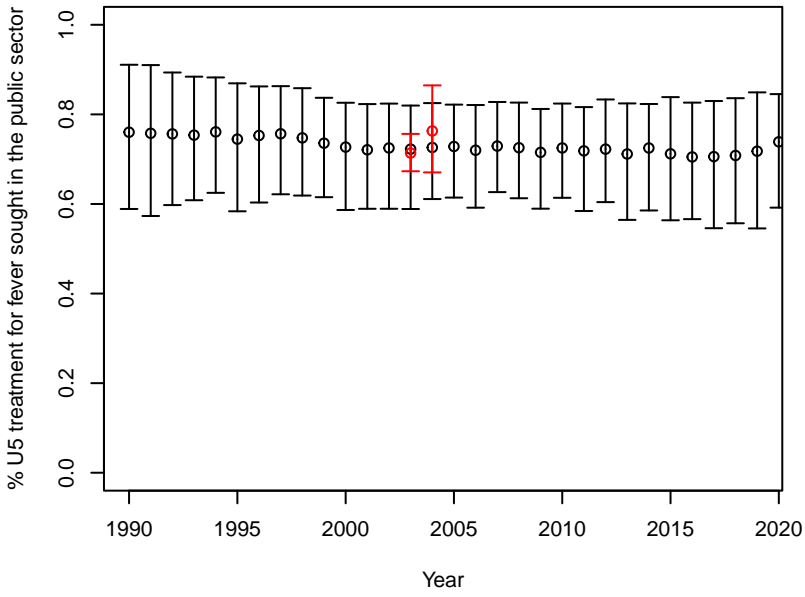

**Andean Latin America: Ecuador, ECU**

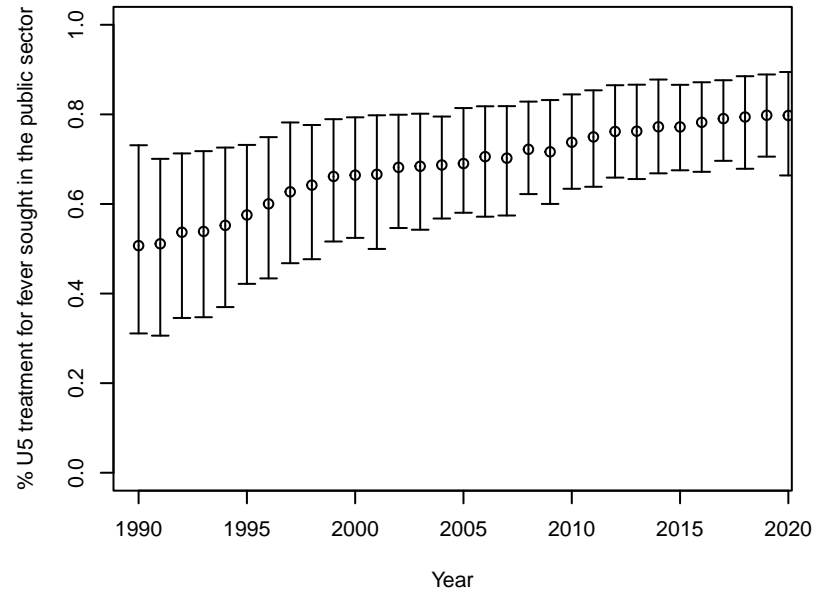

**Andean Latin America: Peru, PER**

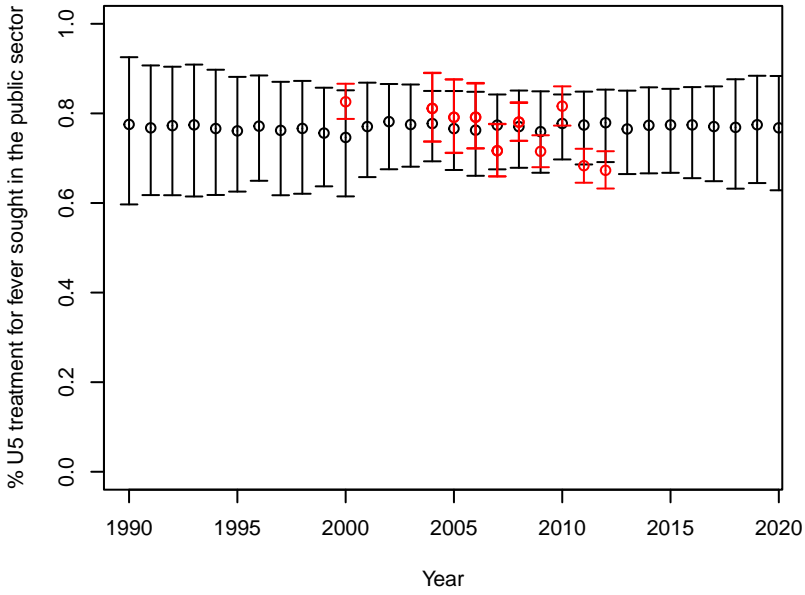

**Central Latin America: Colombia, COL**

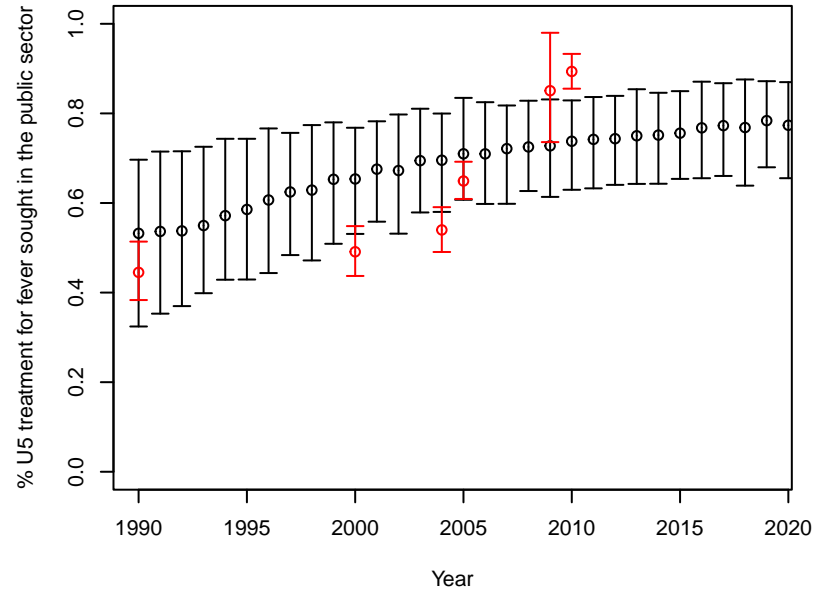

**Central Latin America: Costa Rica, CRI**

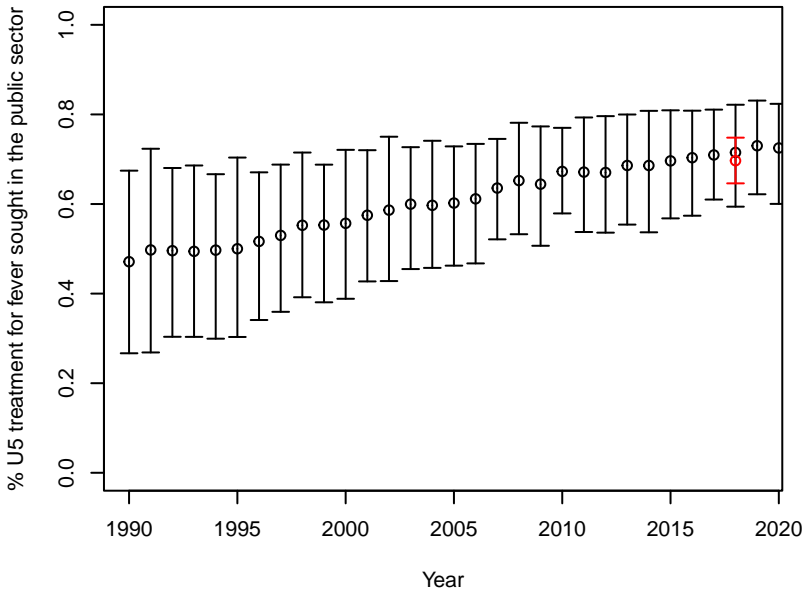

**Central Latin America: El Salvador, SLV**

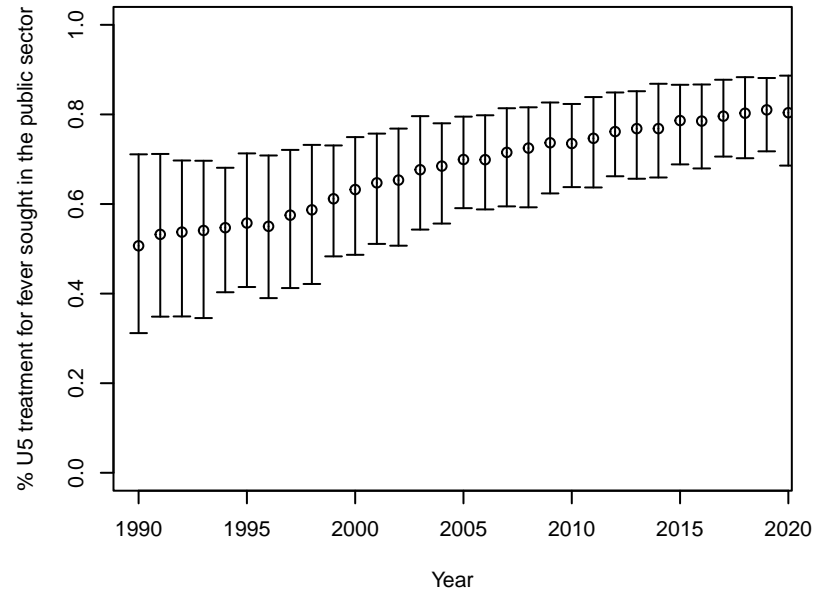

**Central Latin America: Guatemala, GTM**

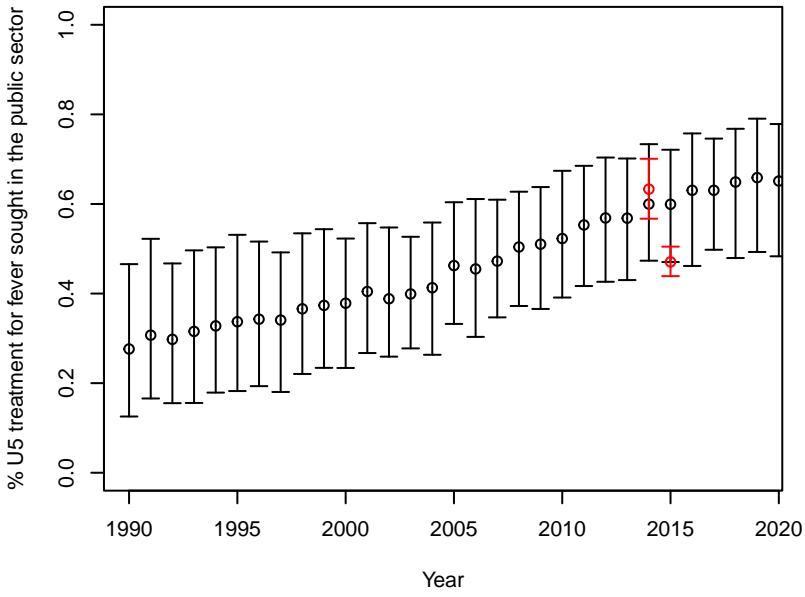

**Central Latin America: Honduras, HND**

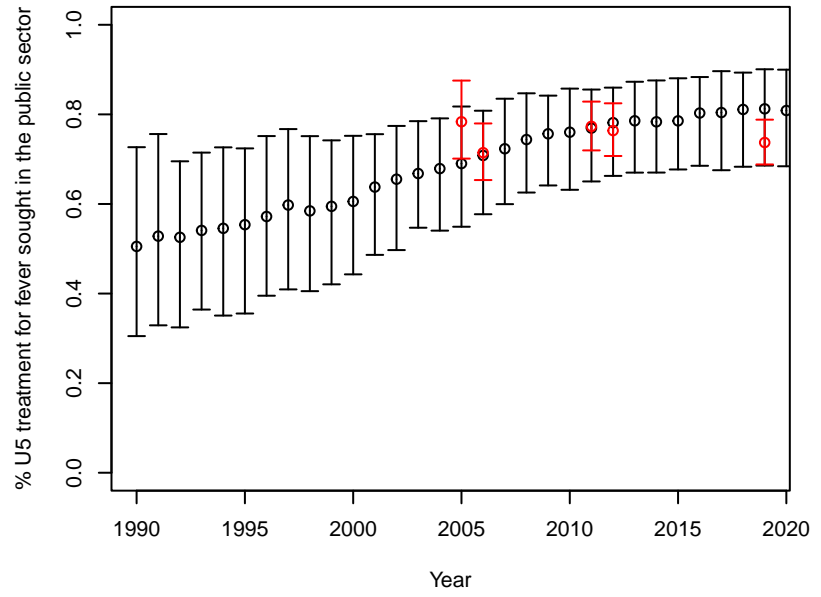

**Central Latin America: Mexico, MEX**

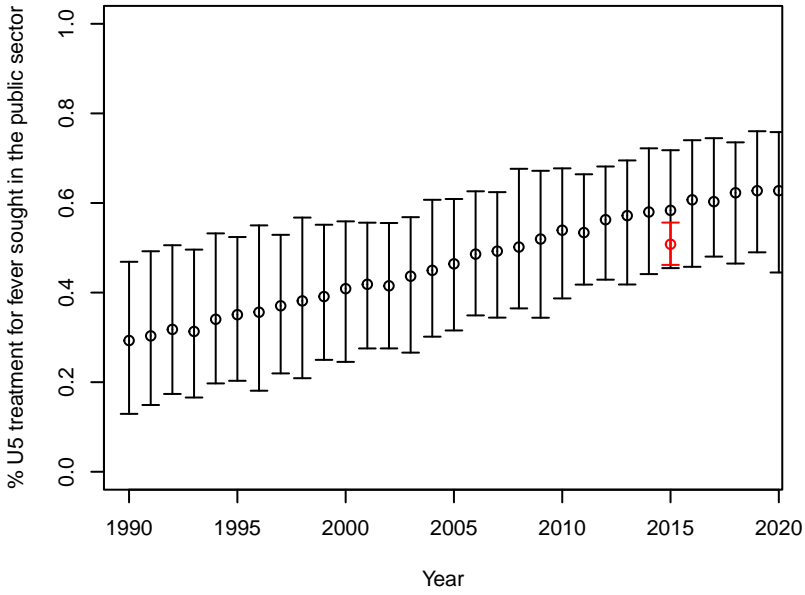

**Central Latin America: Nicaragua, NIC**

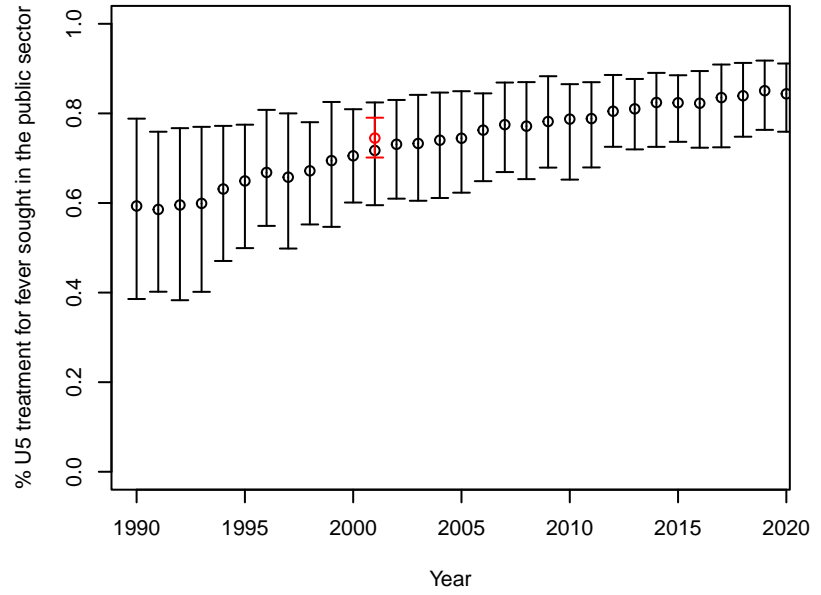

**Central Latin America: Panama, PAN**

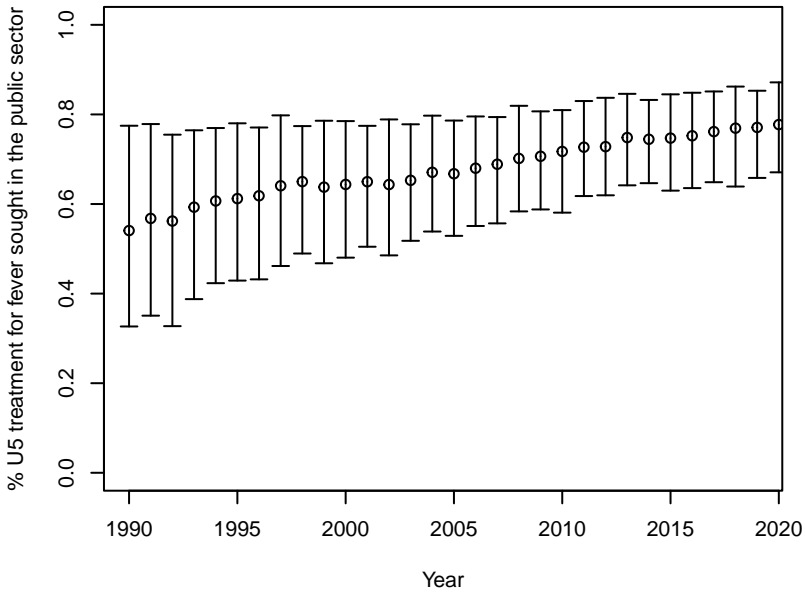

**Central Latin America: Venezuela, VEN**

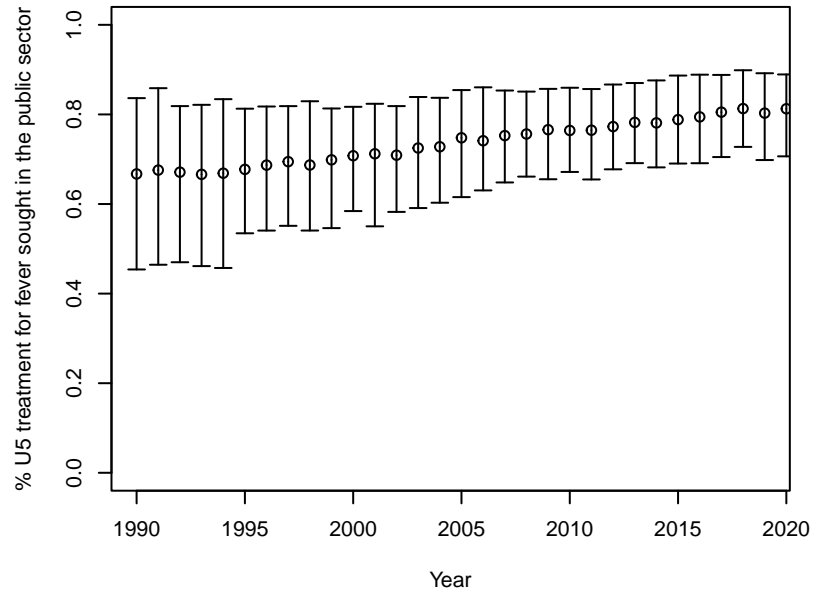

**North Africa and Middle East: Algeria, DZA**

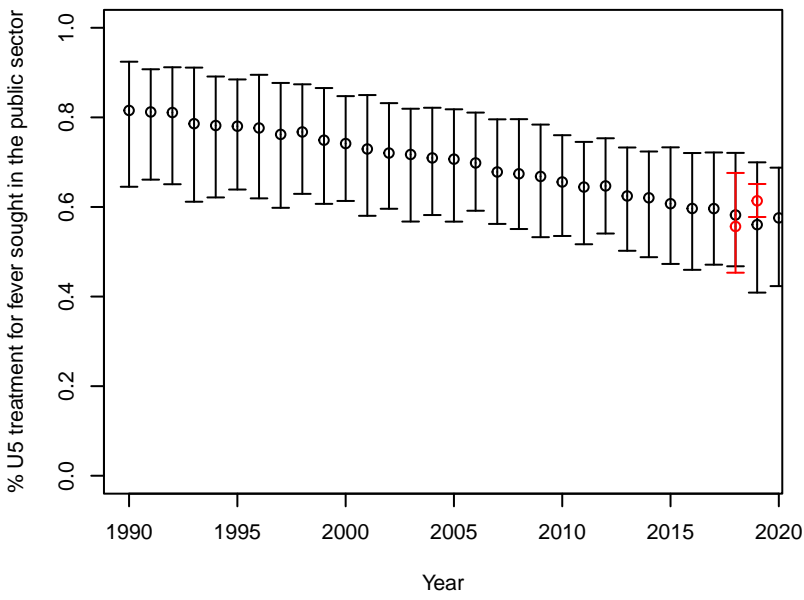

**North Africa and Middle East: Bahrain, BHR**

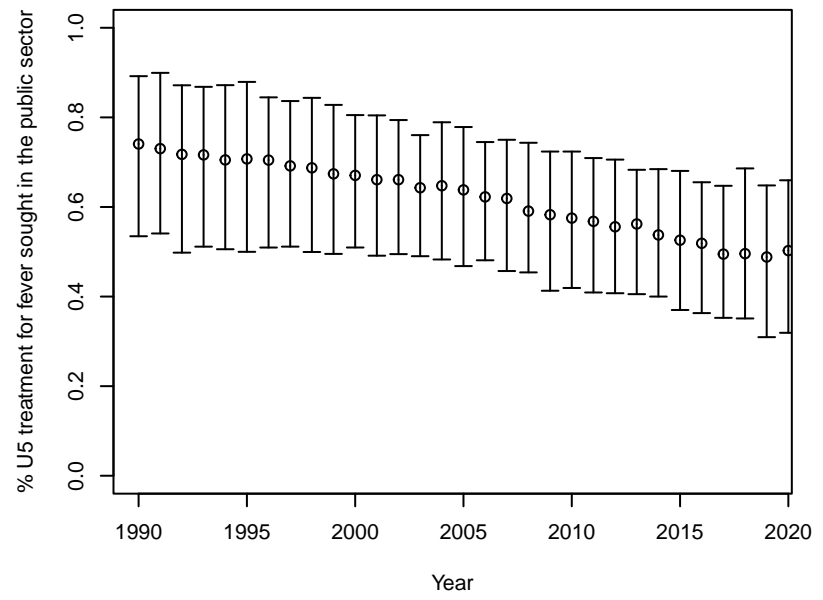

**North Africa and Middle East: Egypt, EGY**

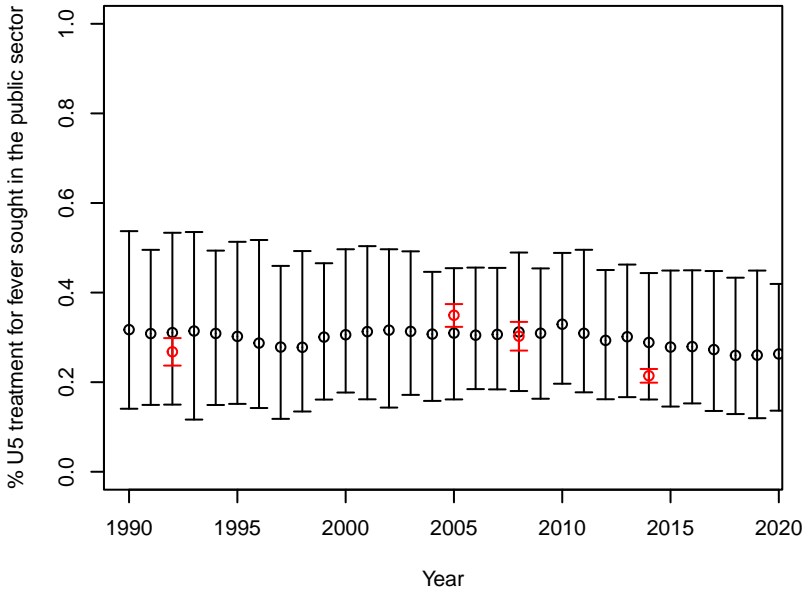

**North Africa and Middle East: Iran, IRN**

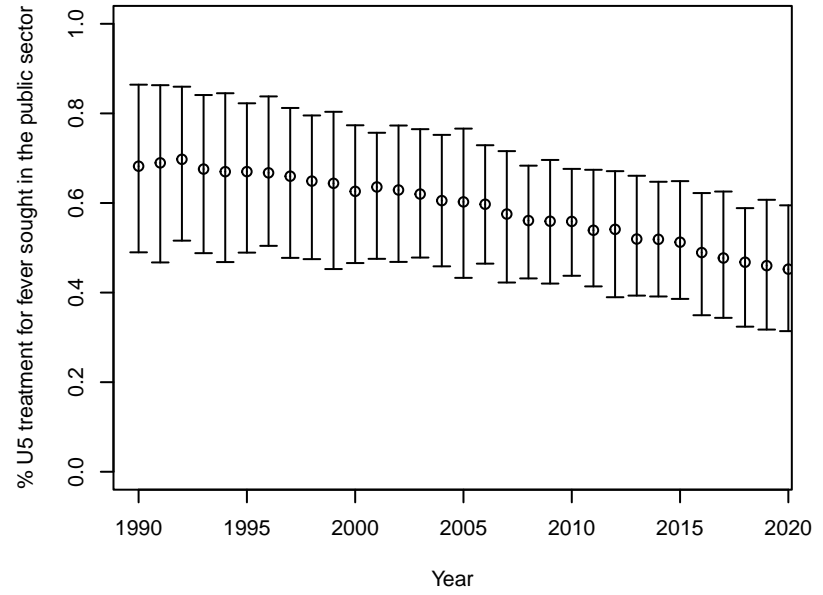

**North Africa and Middle East: Iraq, IRQ**

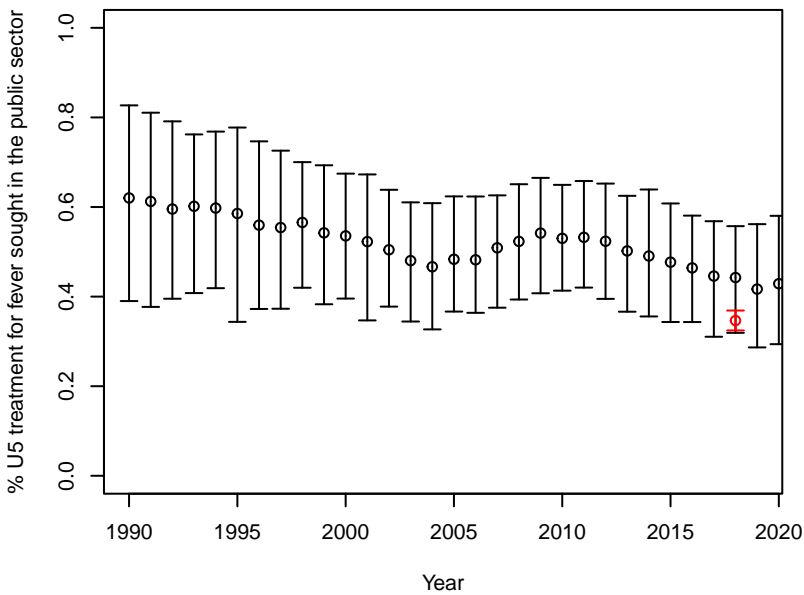

**North Africa and Middle East: Jordan, JOR**

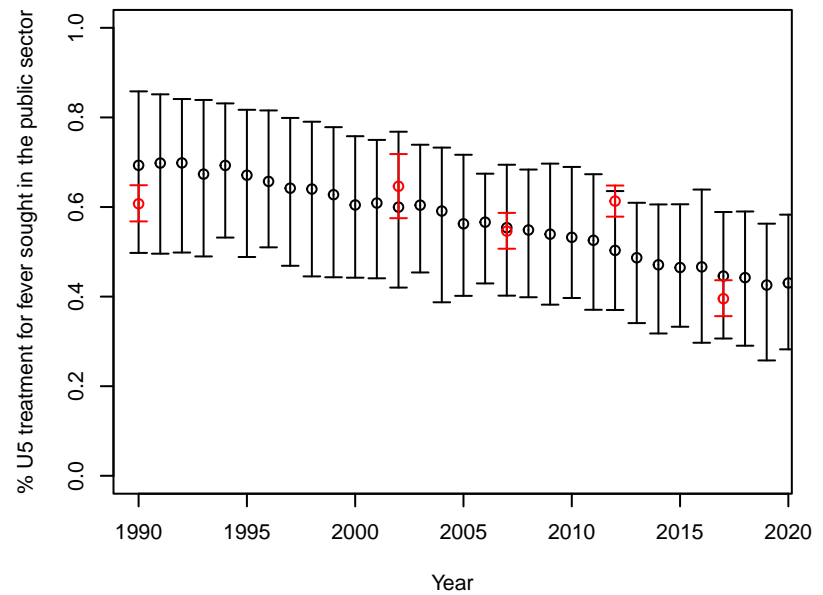

**North Africa and Middle East: Kuwait, KWT**

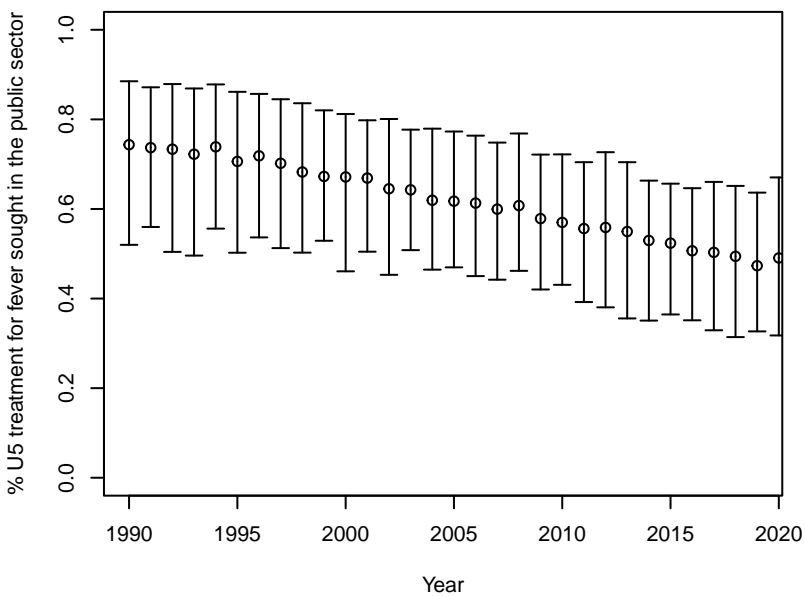

**North Africa and Middle East: Lebanon, LBN**

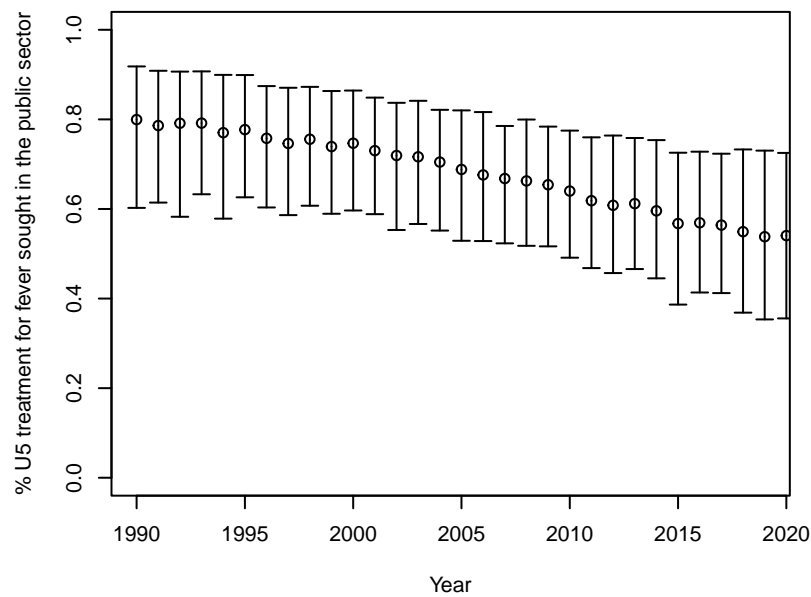

**North Africa and Middle East: Libya, LBY**

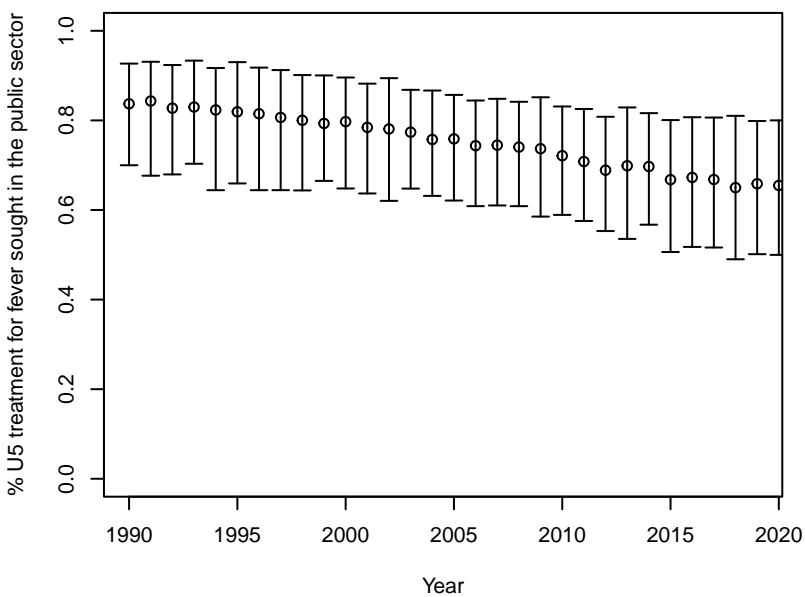

**North Africa and Middle East: Morocco, MAR**

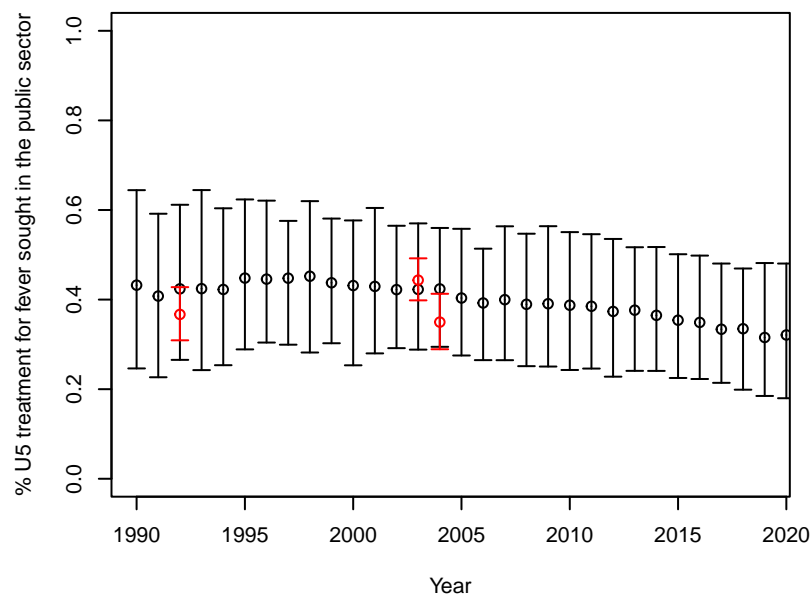

**North Africa and Middle East: Palestine, PSE**

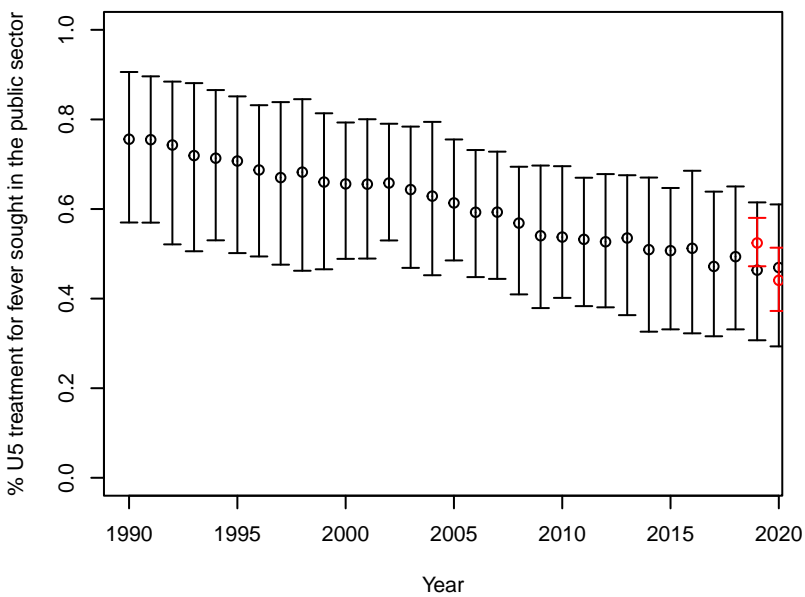

**North Africa and Middle East: Oman, OMN**

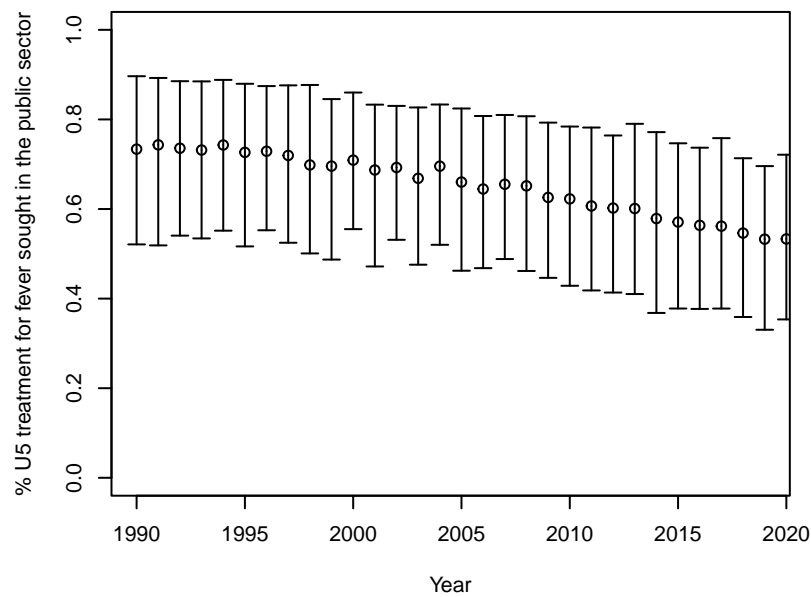

**North Africa and Middle East: Qatar, QAT**

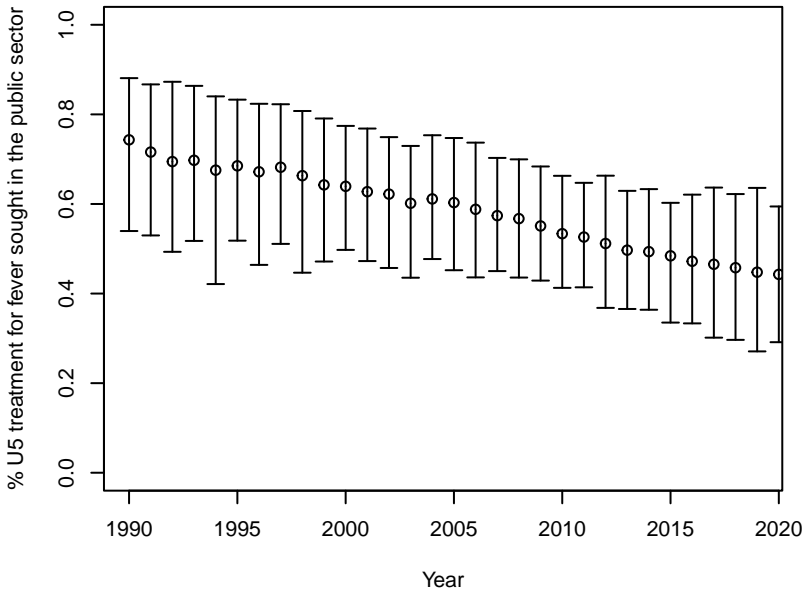

**North Africa and Middle East: Saudi Arabia, SAU**

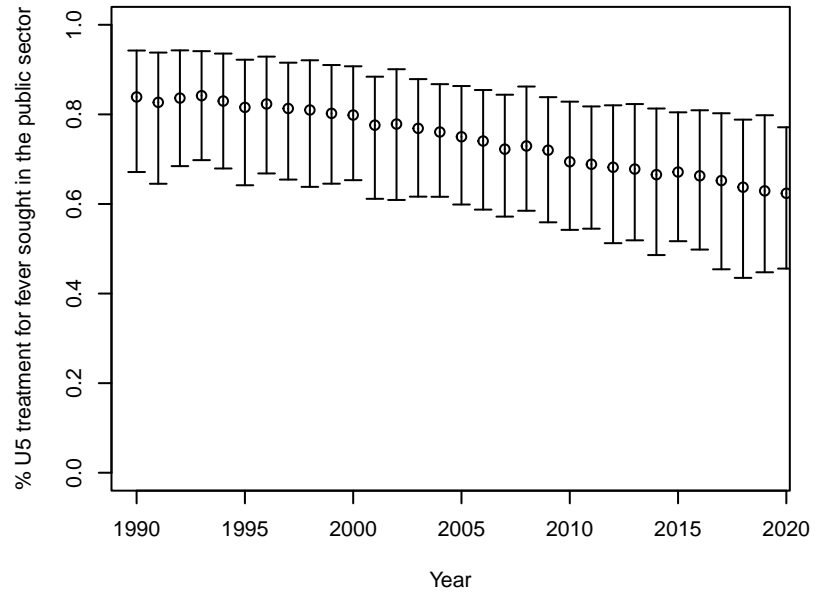

**North Africa and Middle East: Syria, SYR**

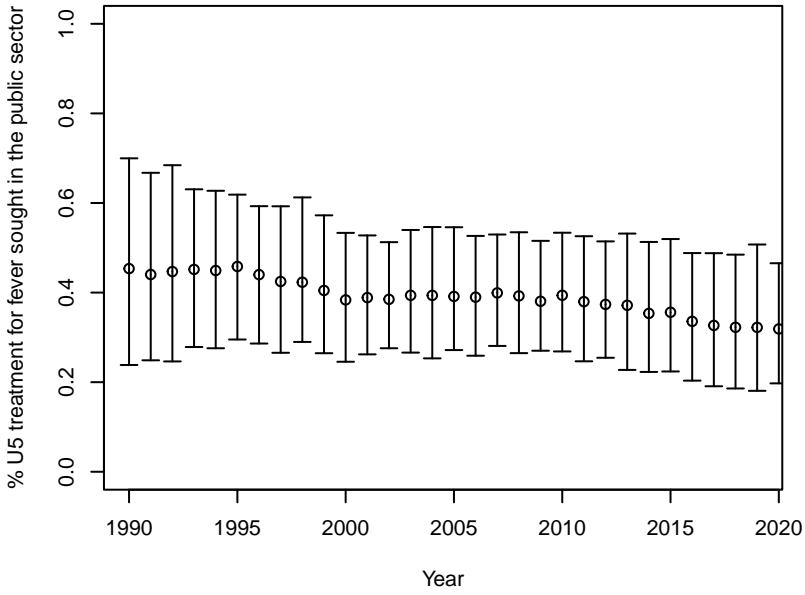

**North Africa and Middle East: Tunisia, TUN**

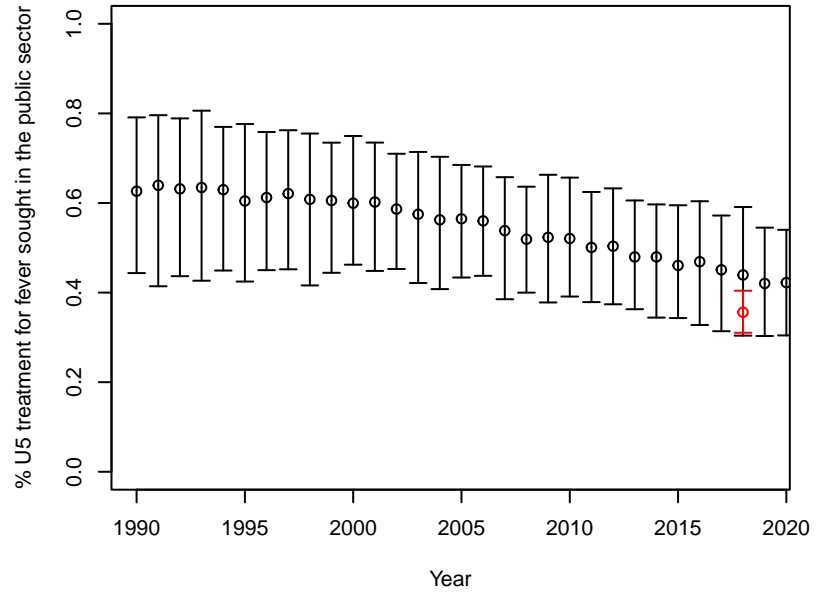

**North Africa and Middle East: Turkey, TUR**

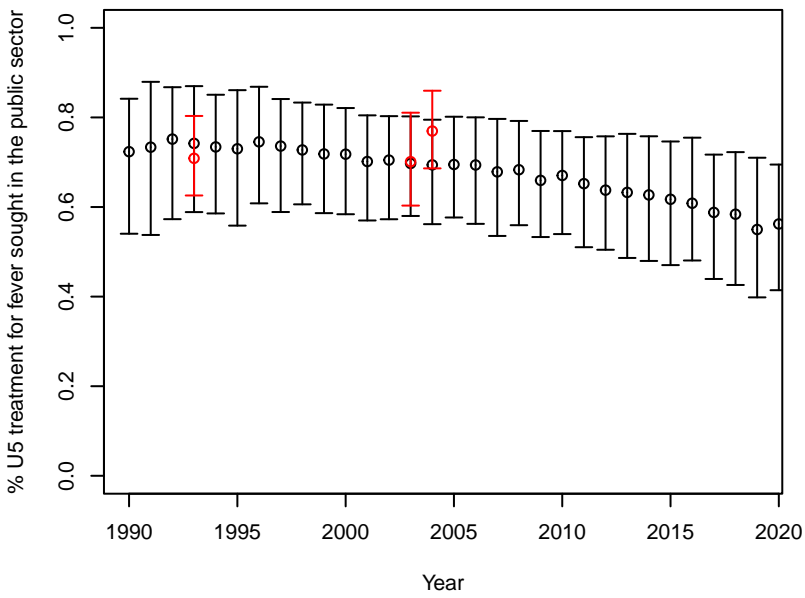

**North Africa and Middle East: United Arab Emirates, ARE**

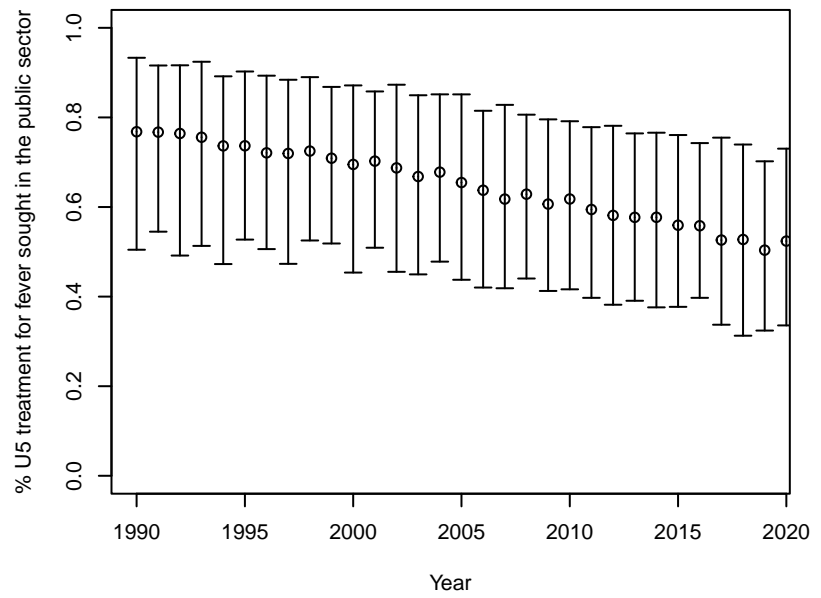



**North Africa and Middle East: Yemen, YEM**

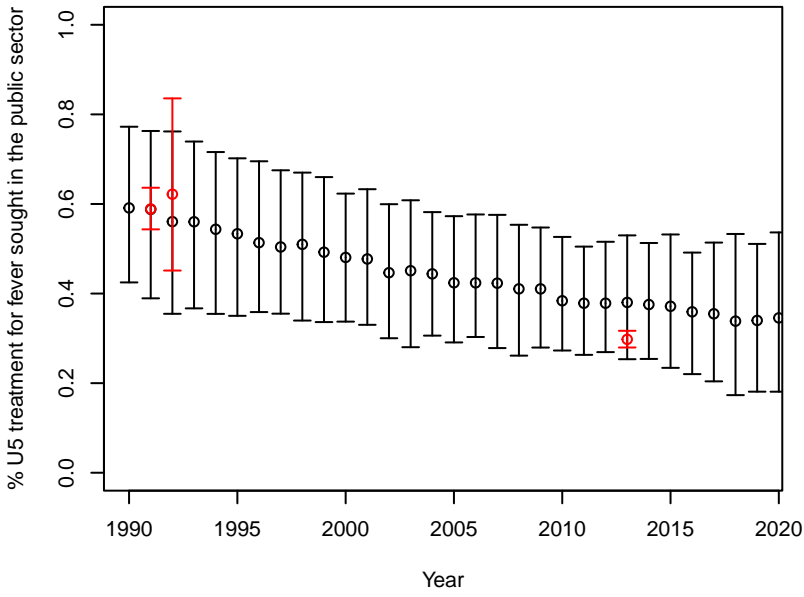

**North Africa and Middle East: Afghanistan, AFG**

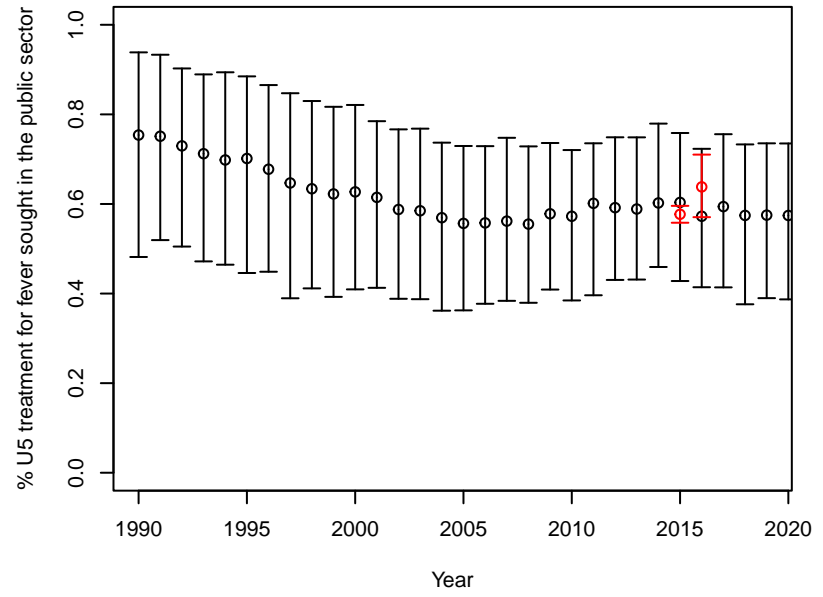

**North Africa and Middle East: Sudan, SDN**

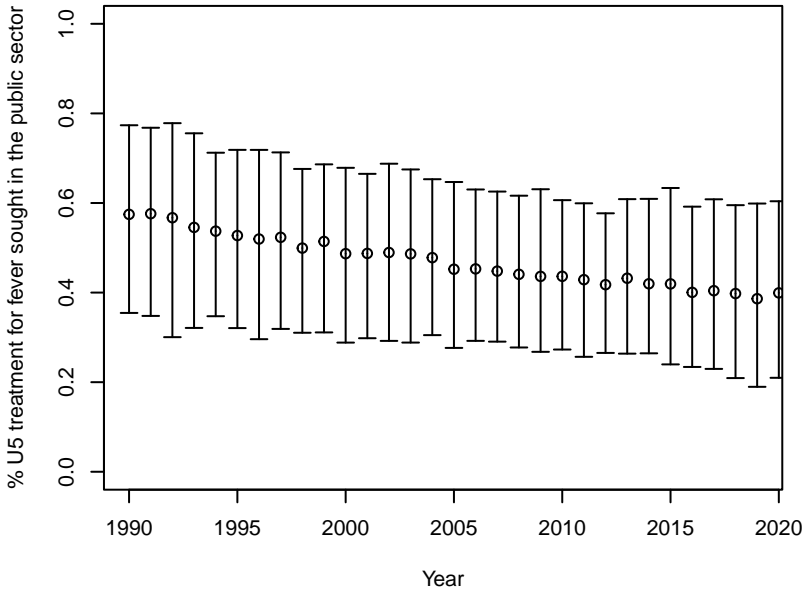

**South Asia: Bangladesh, BGD**

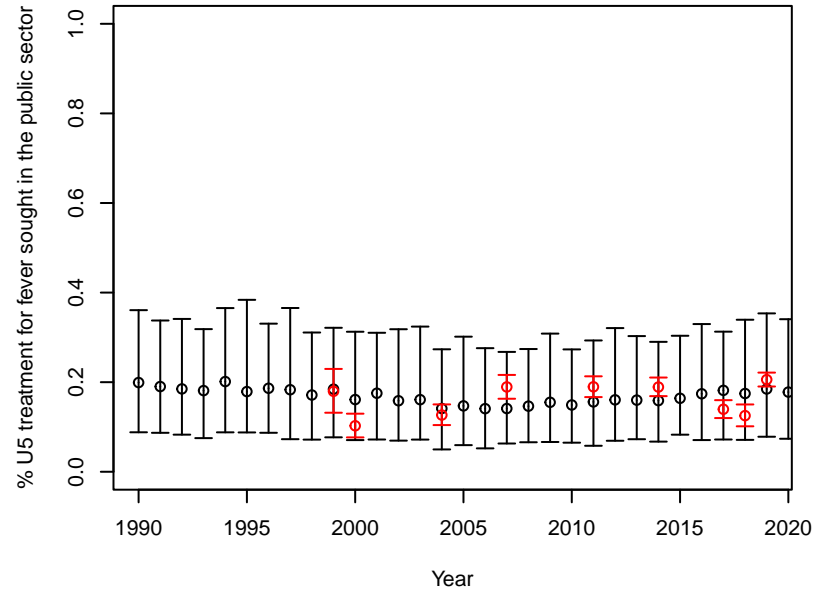

**South Asia: Bhutan, BTN**

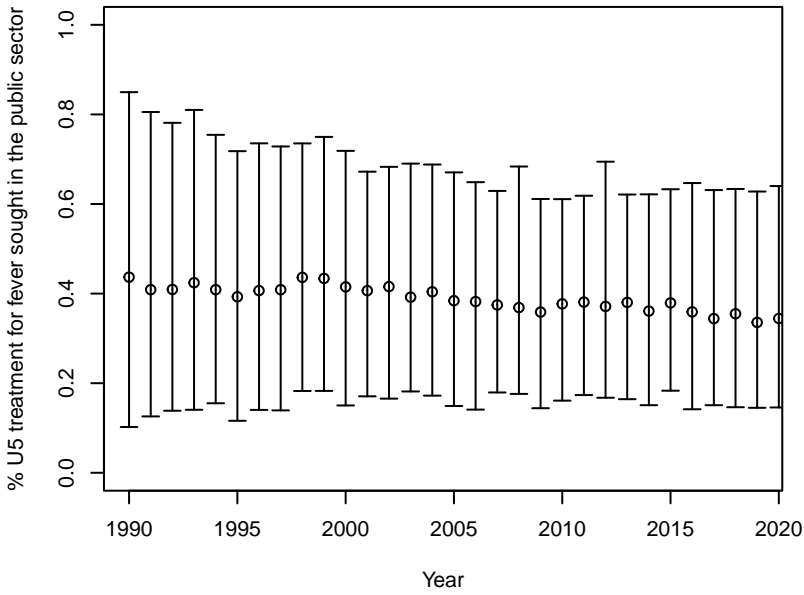

**South Asia: India, IND**

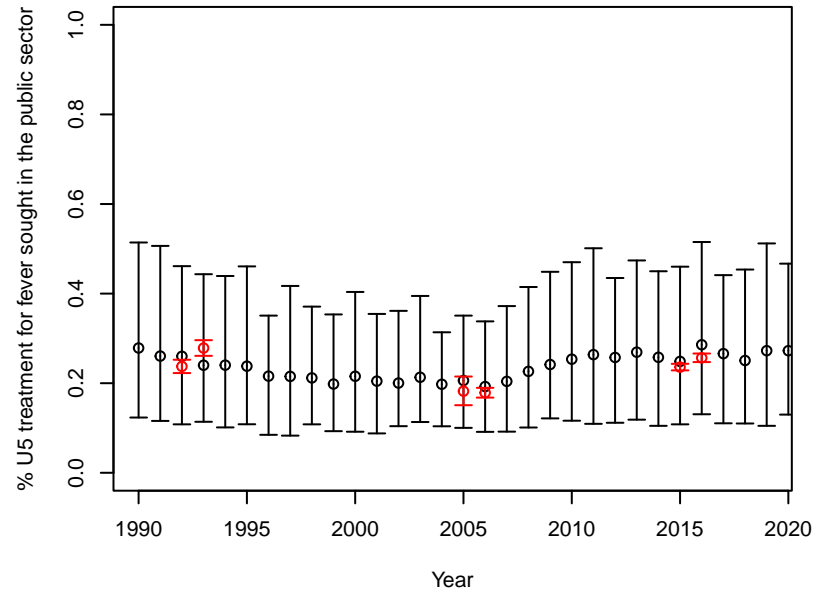

**South Asia: Nepal, NPL**

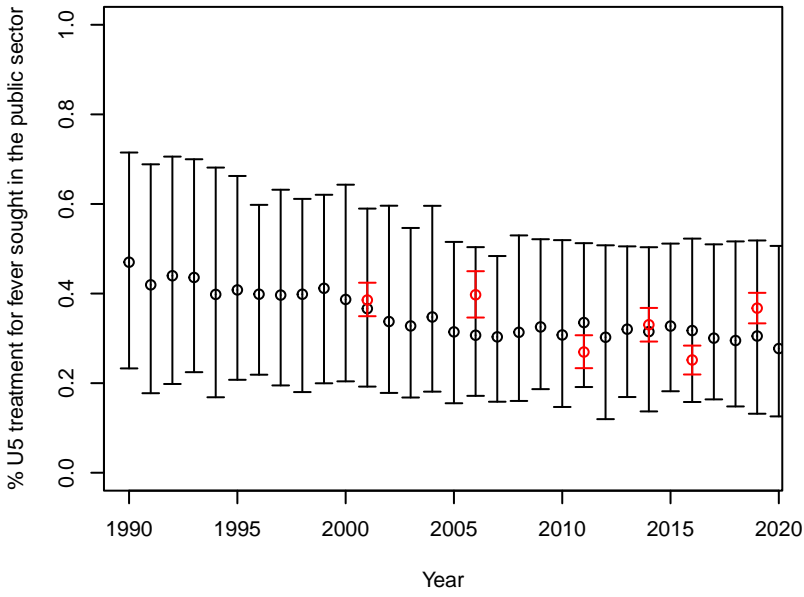

**South Asia: Pakistan, PAK**

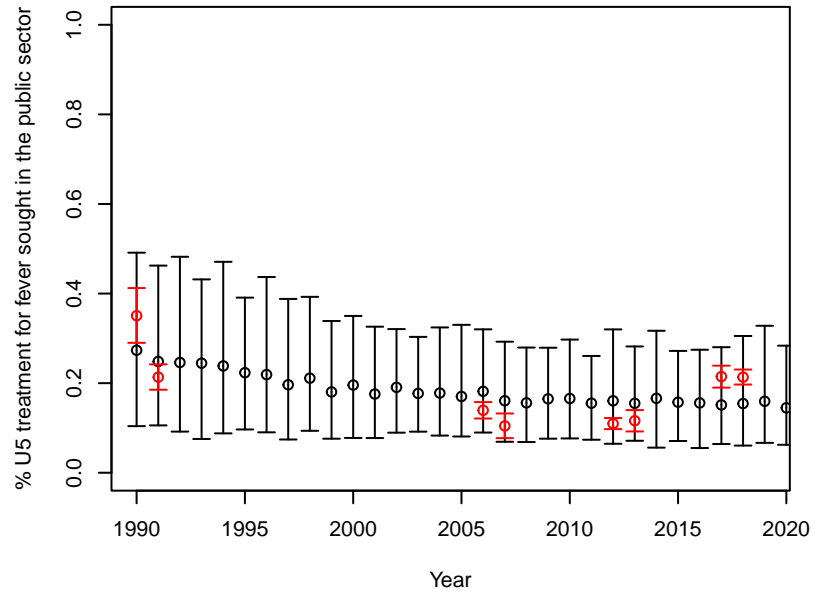

**Central Sub-Saharan Africa: Angola, AGO**

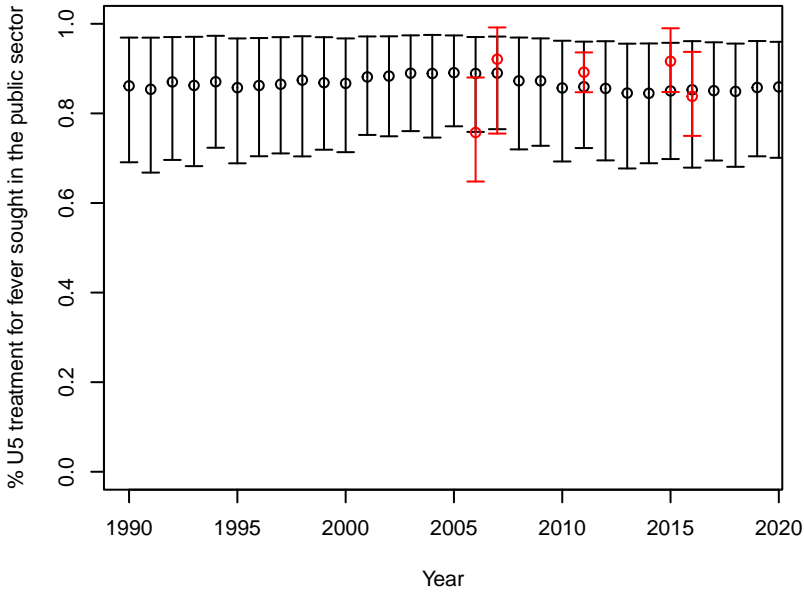

**Central Sub-Saharan Africa: Central African Republic, CAF**

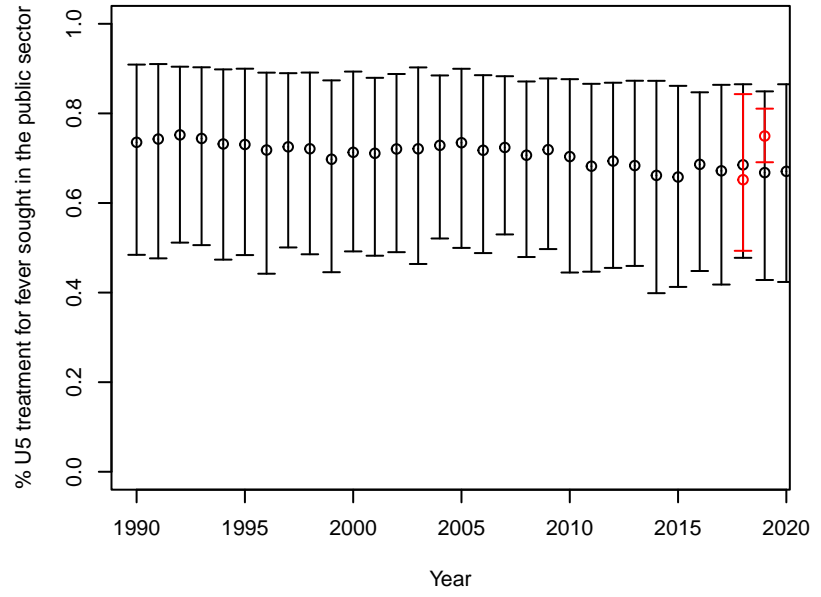

**Central Sub-Saharan Africa: Congo, COG**

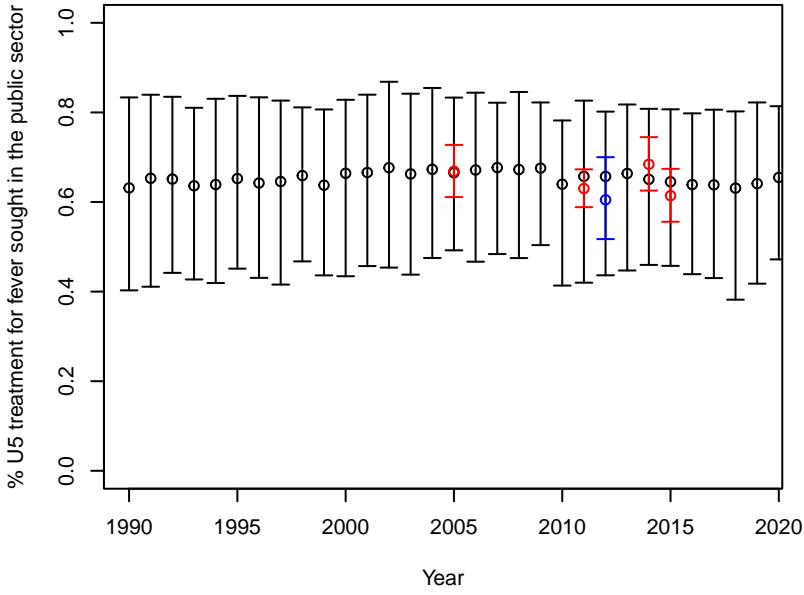

**Central Sub-Saharan Africa: Democratic Republic of the Congo, COD**

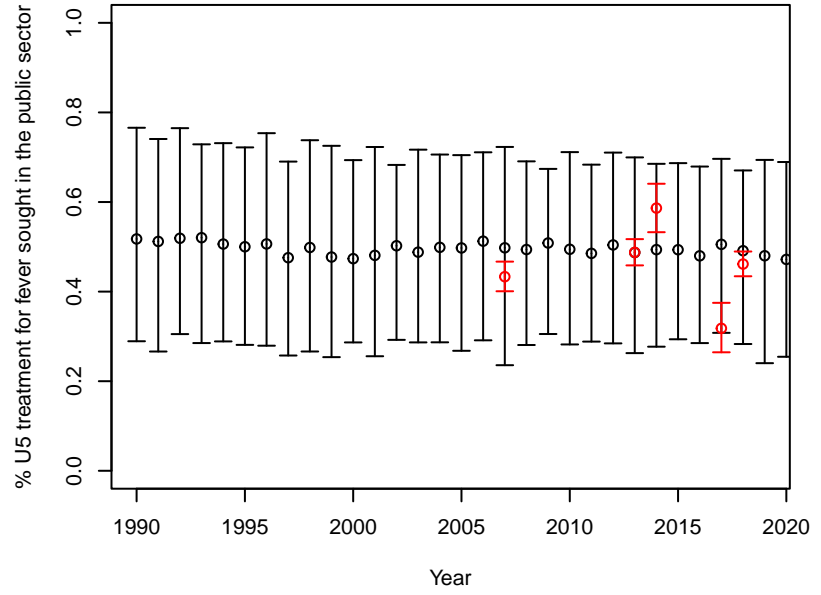

**Central Sub-Saharan Africa: Equatorial Guinea, GNQ**

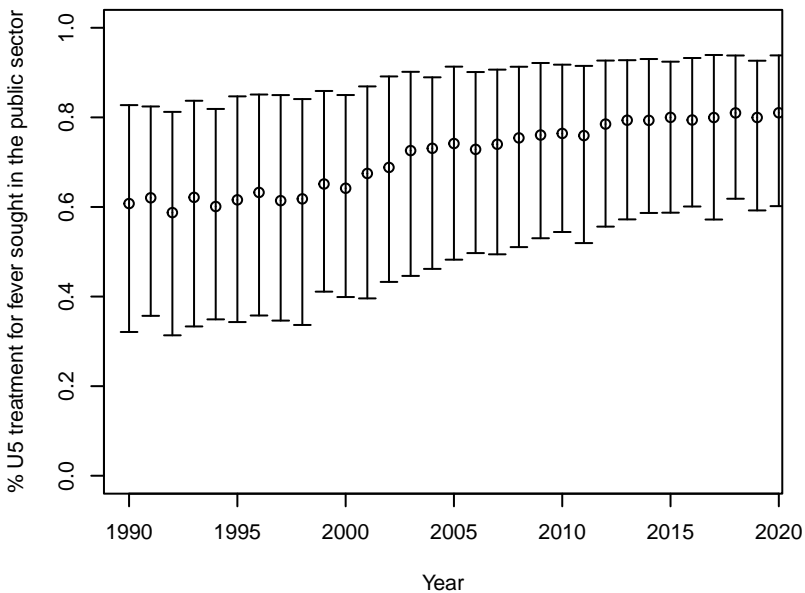

**Central Sub-Saharan Africa: Gabon, GAB**

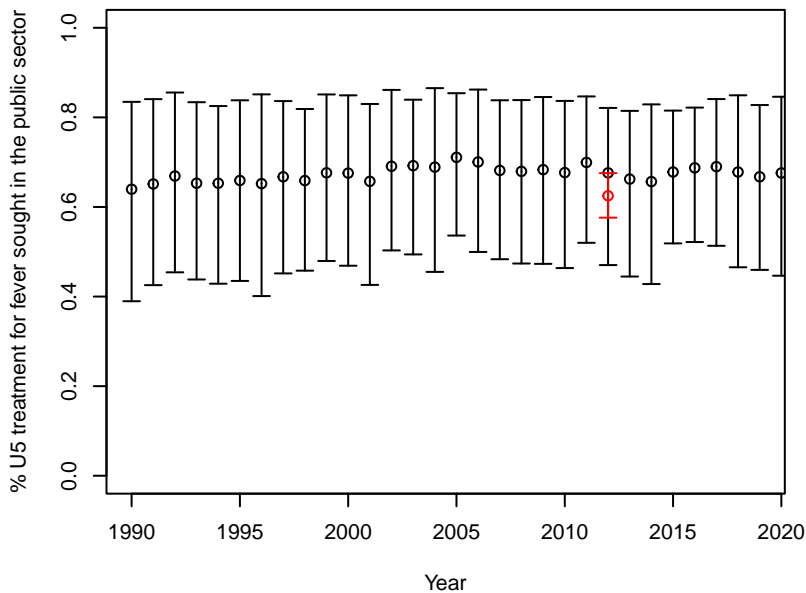

**Eastern Sub-Saharan Africa: Burundi, BDI**

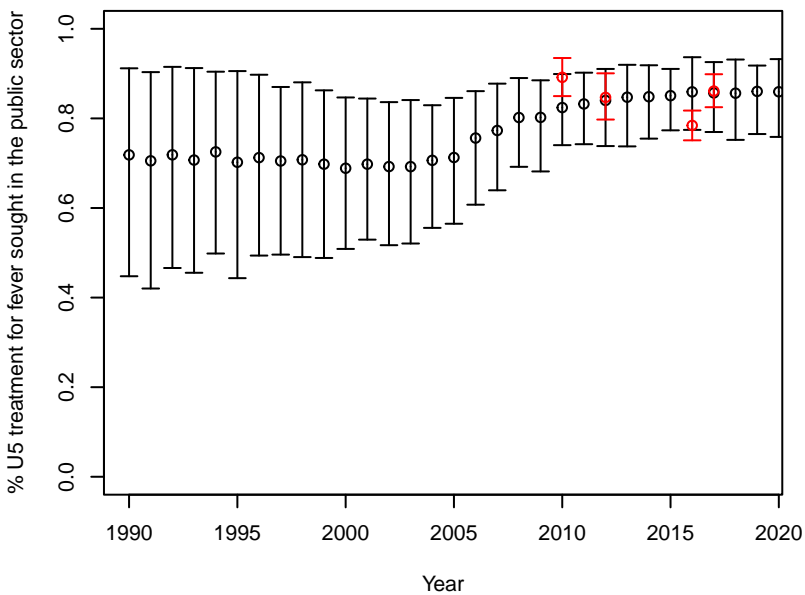

**Eastern Sub-Saharan Africa: Comoros, COM**

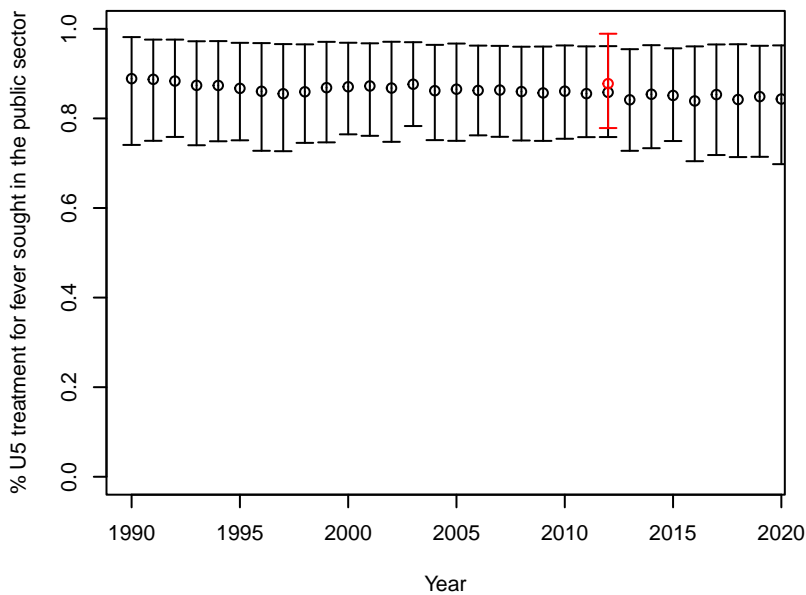

**Eastern Sub-Saharan Africa: Djibouti, DJI**

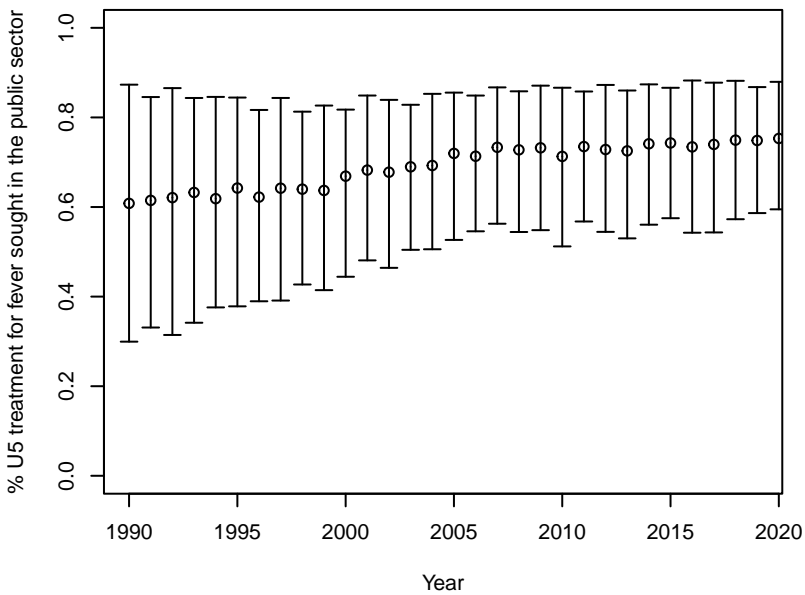

**Eastern Sub-Saharan Africa: Eritrea, ERI**

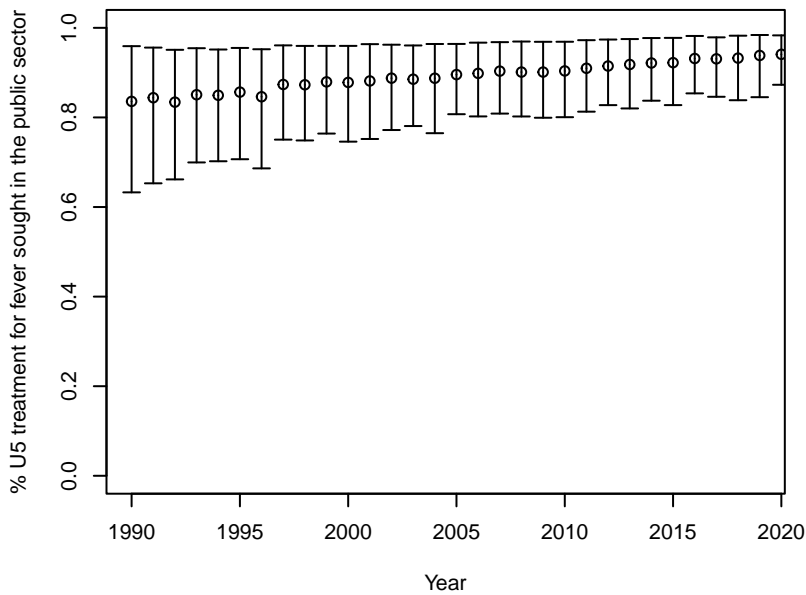

**Eastern Sub-Saharan Africa: Ethiopia, ETH**

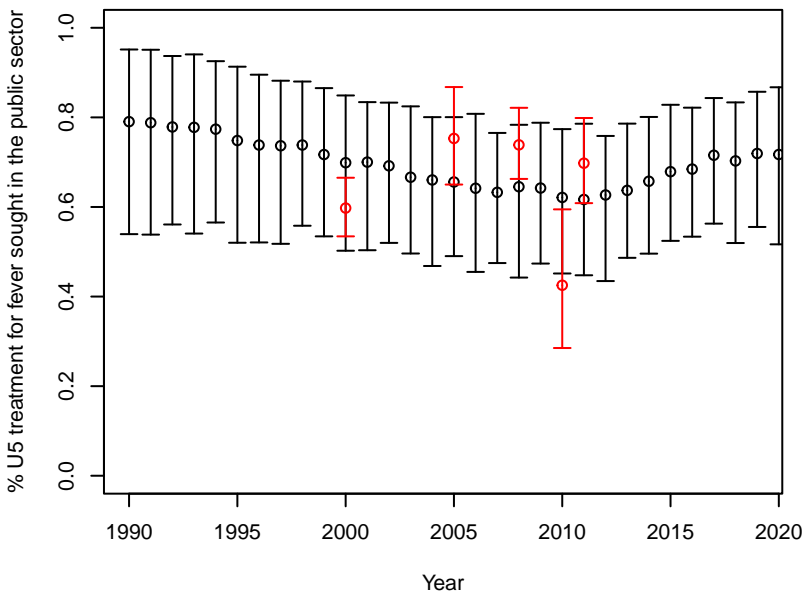

**Eastern Sub-Saharan Africa: Kenya, KEN**

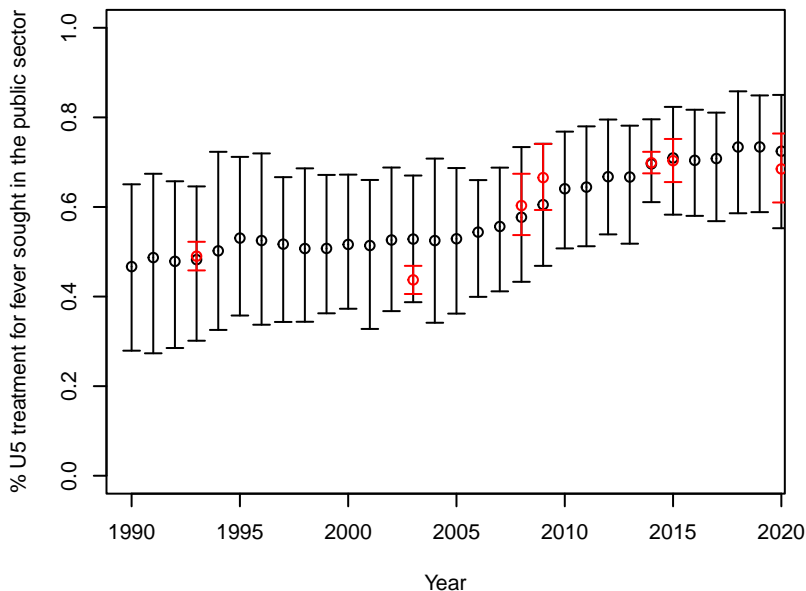

**Eastern Sub-Saharan Africa: Madagascar, MDG**

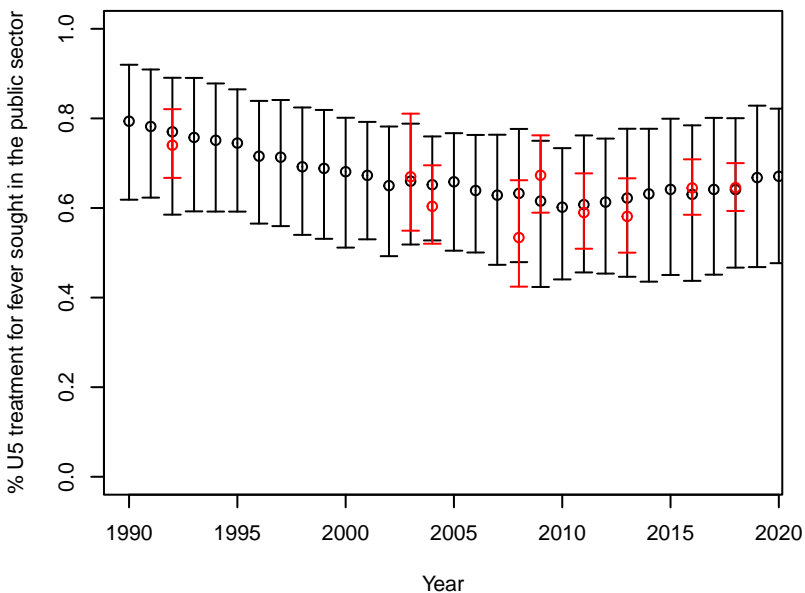

**Eastern Sub-Saharan Africa: Malawi, MWI**

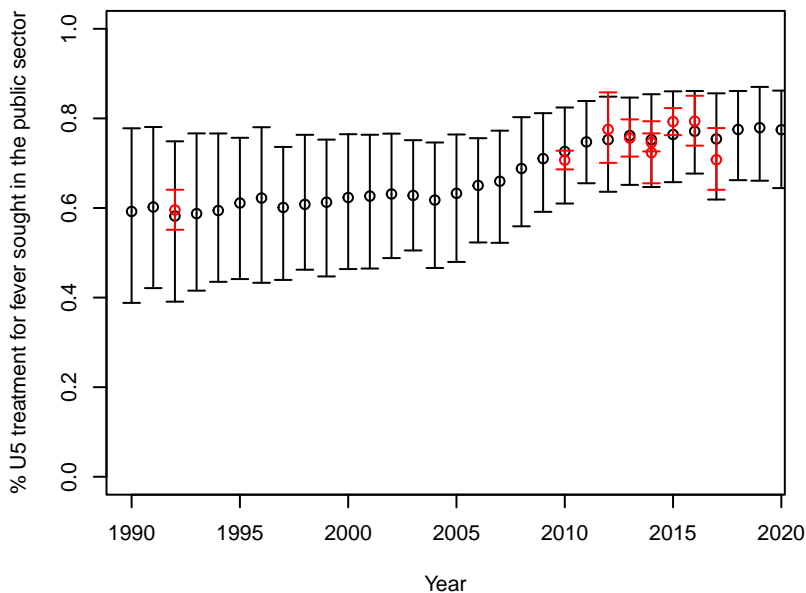

**Eastern Sub-Saharan Africa: Mozambique, MOZ**

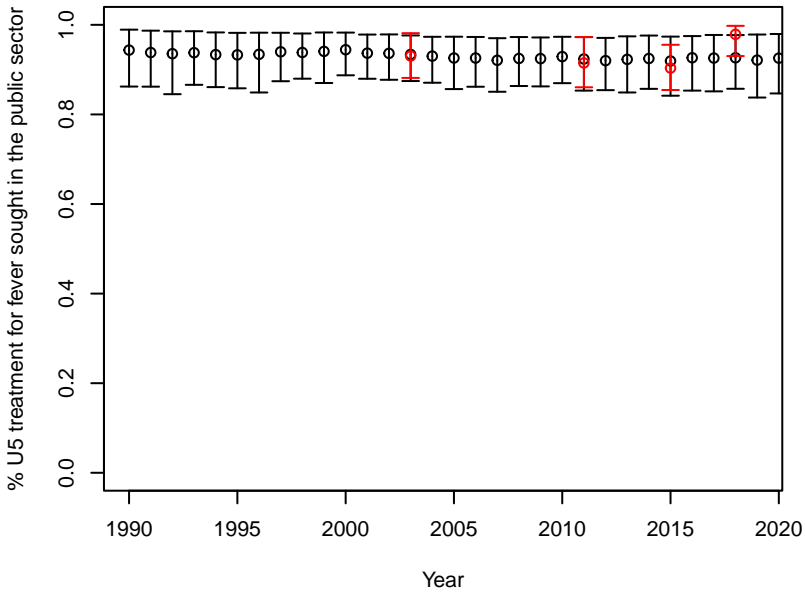

**Eastern Sub-Saharan Africa: Rwanda, RWA**

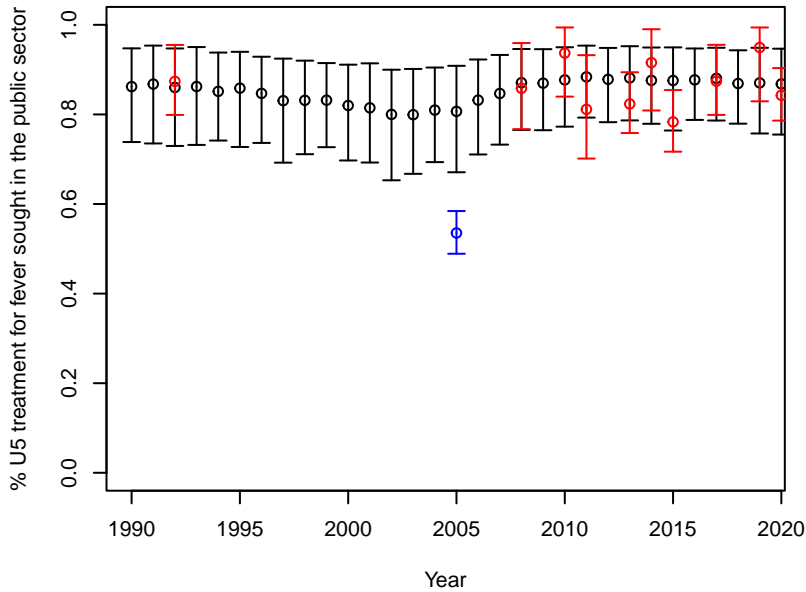

**Eastern Sub-Saharan Africa: Somalia, SOM**

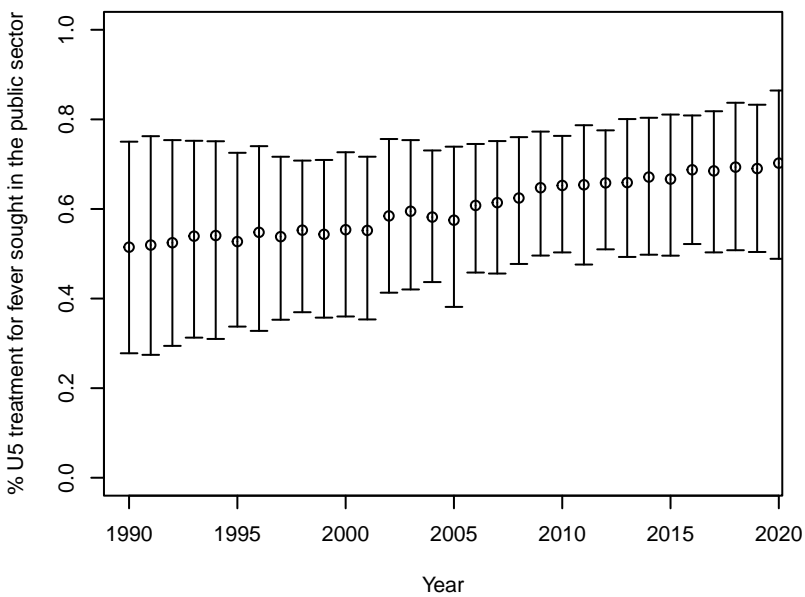

**Eastern Sub-Saharan Africa: Tanzania, TZA**

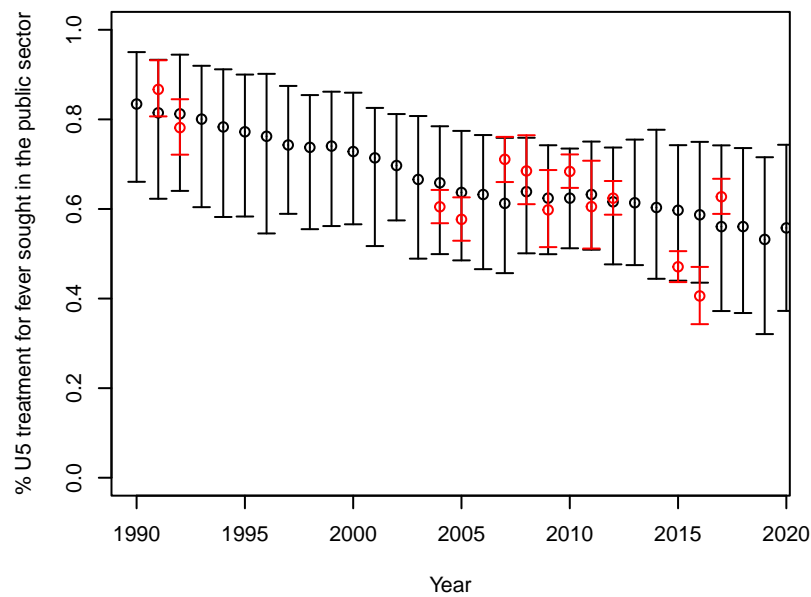

**Eastern Sub-Saharan Africa: Uganda, UGA**

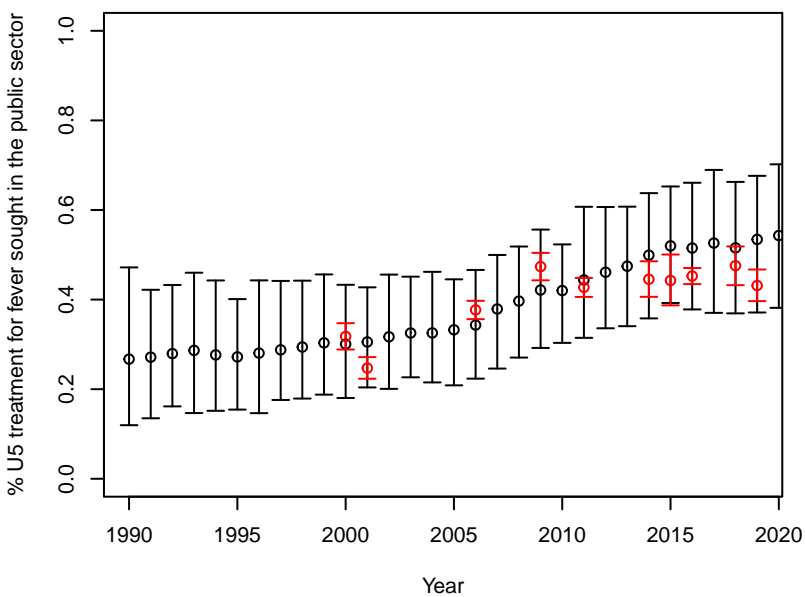

**Eastern Sub-Saharan Africa: Zambia, ZMB**

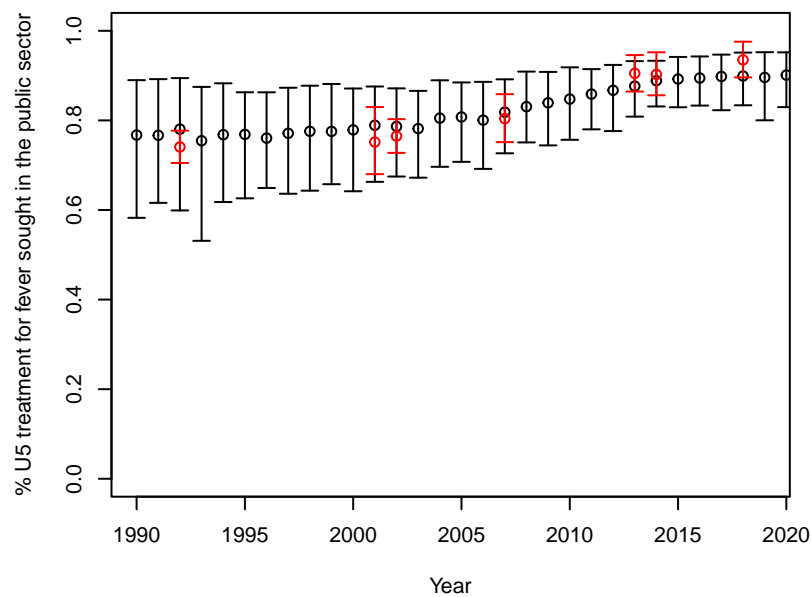

**Eastern Sub-Saharan Africa: Mayotte, MYT**

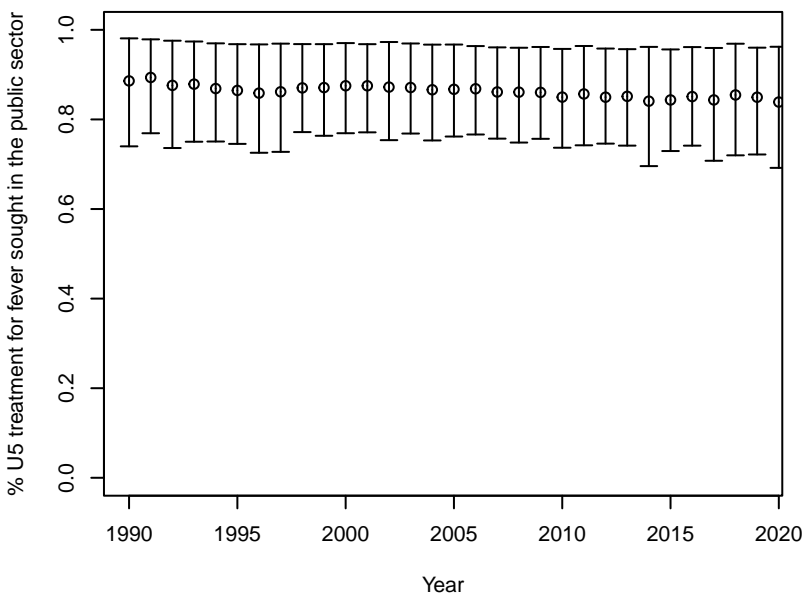

**Eastern Sub-Saharan Africa: South Sudan, SSD**

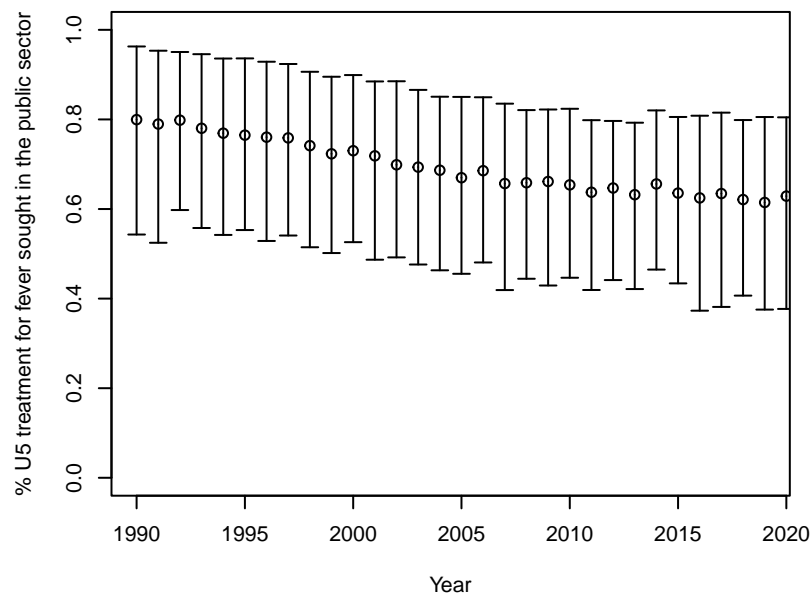

**Southern Sub-Saharan Africa: Botswana, BWA**

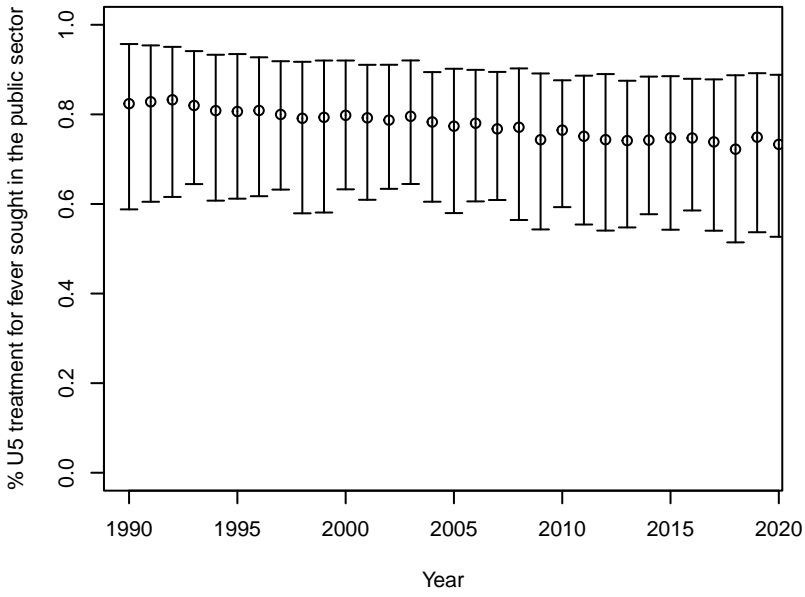

**Southern Sub-Saharan Africa: Lesotho, LSO**

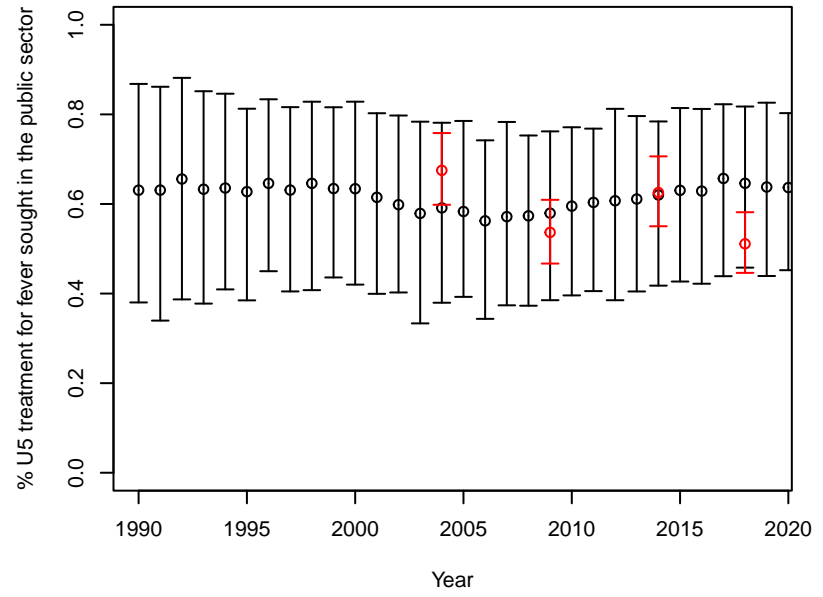

**Southern Sub-Saharan Africa: Namibia, NAM**

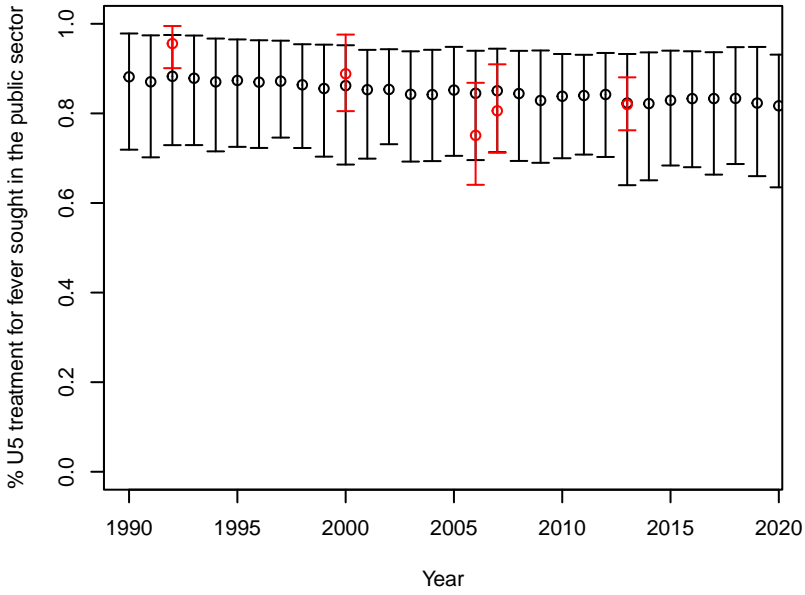

**Southern Sub-Saharan Africa: South Africa, ZAF**

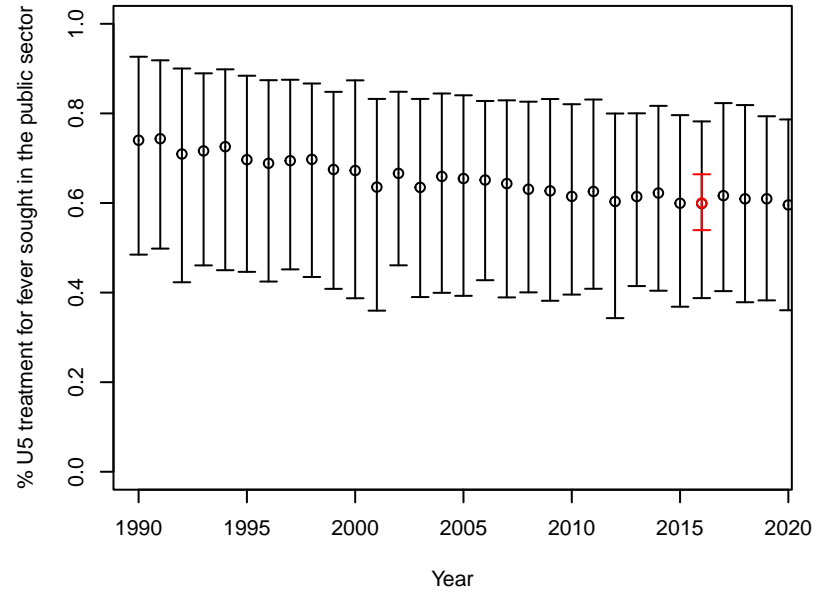

**Southern Sub-Saharan Africa: Eswatini, SWZ**

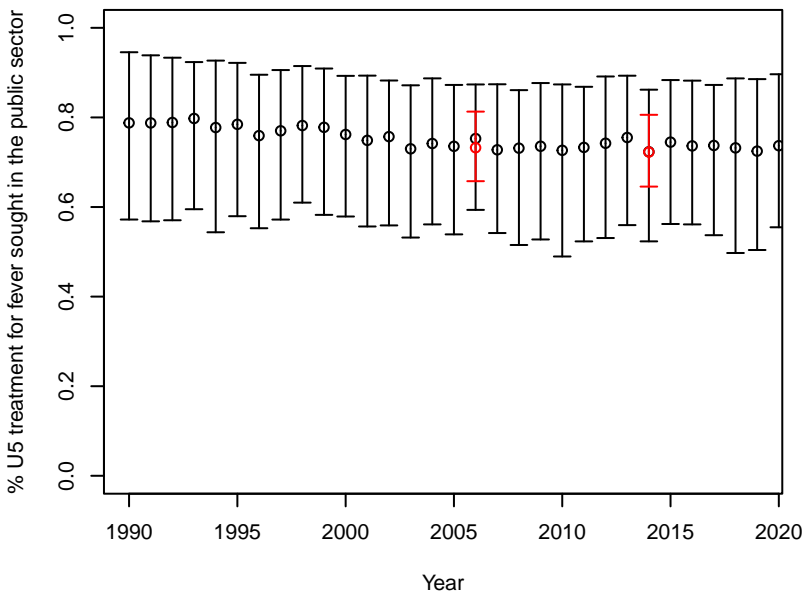

**Southern Sub-Saharan Africa: Zimbabwe, ZWE**

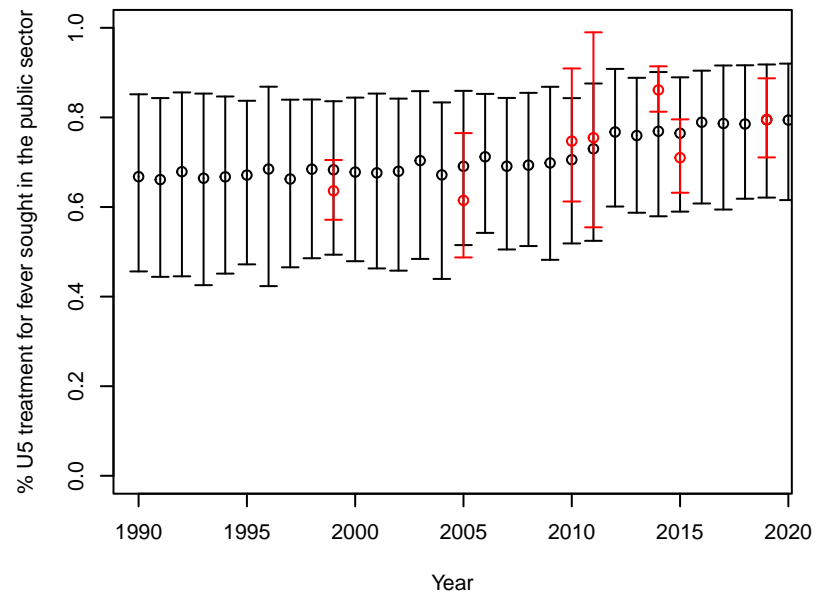

**Western Sub-Saharan Africa: Benin, BEN**

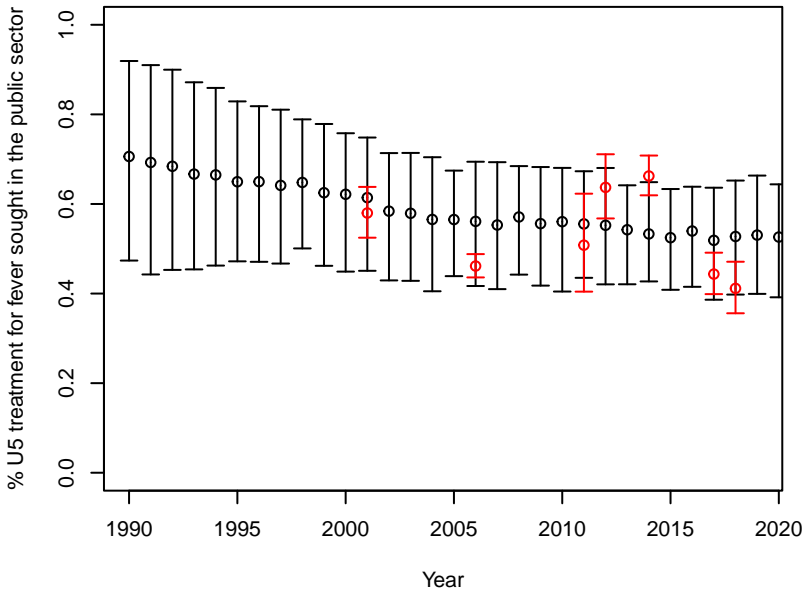

**Western Sub-Saharan Africa: Burkina Faso, BFA**

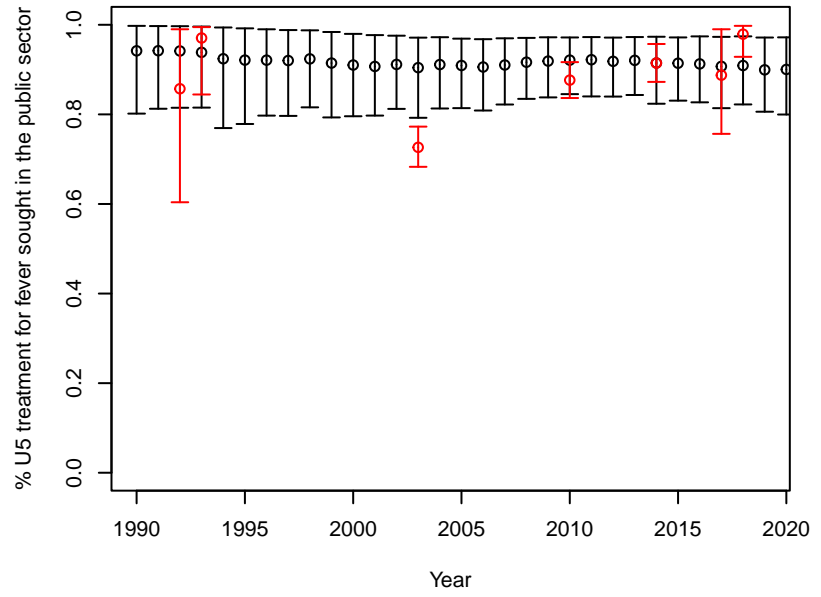

**Western Sub-Saharan Africa: Cameroon, CMR**

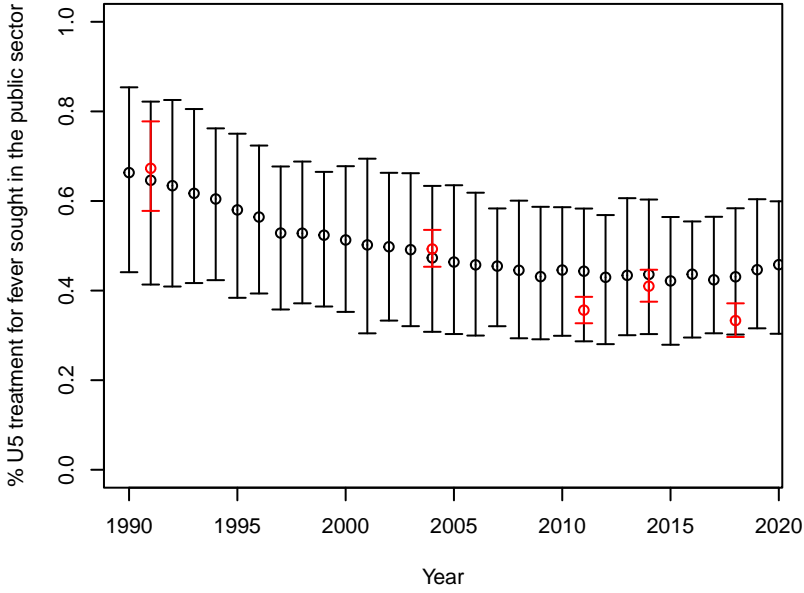

**Western Sub-Saharan Africa: Cape Verde, CPV**

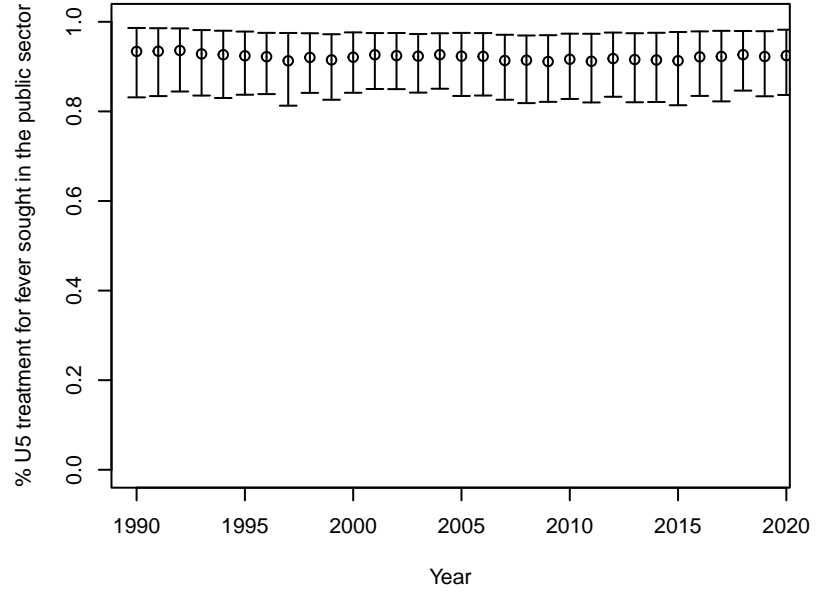

**Western Sub-Saharan Africa: Chad, TCD**

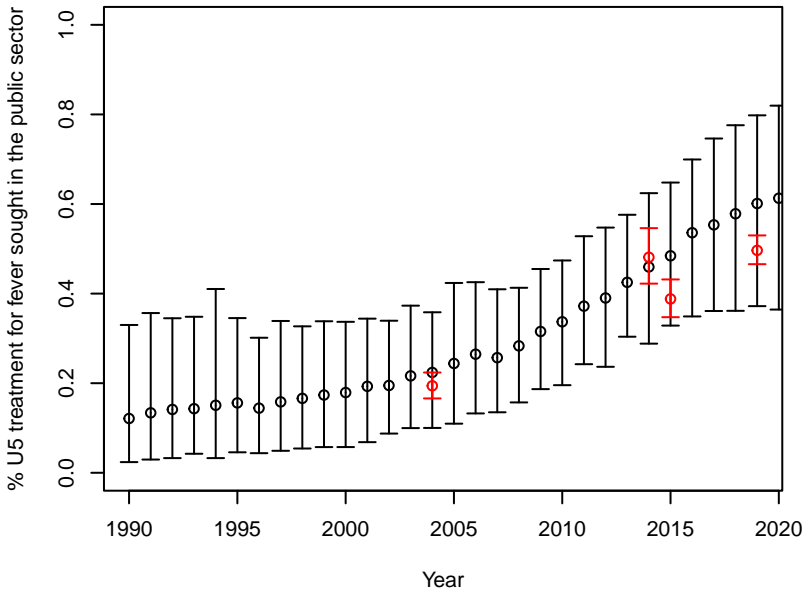

**Western Sub-Saharan Africa: Cote d'Ivoire, CIV**

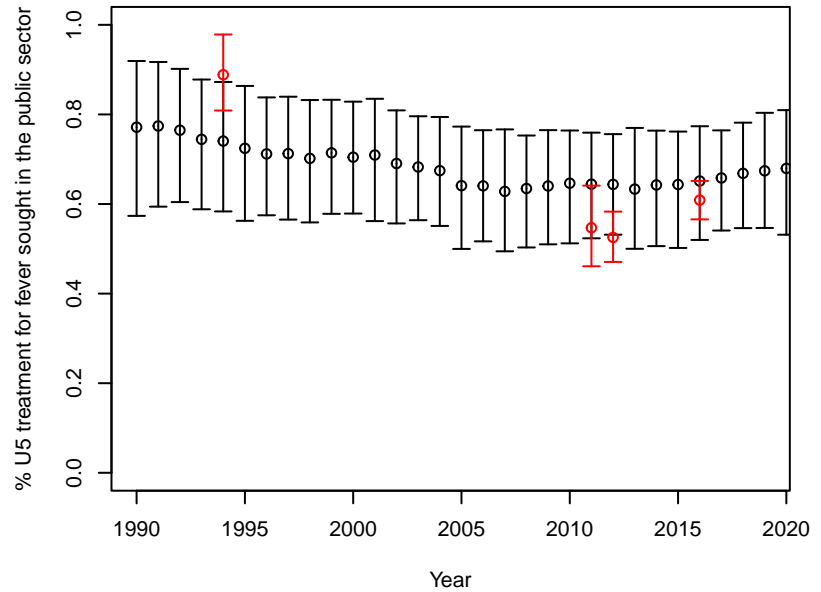

**Western Sub-Saharan Africa: The Gambia, GMB**

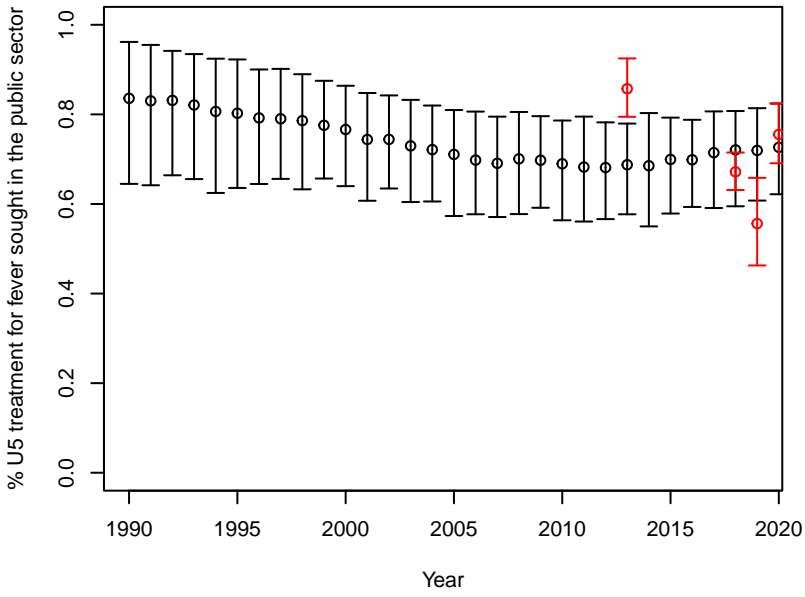

**Western Sub-Saharan Africa: Ghana, GHA**

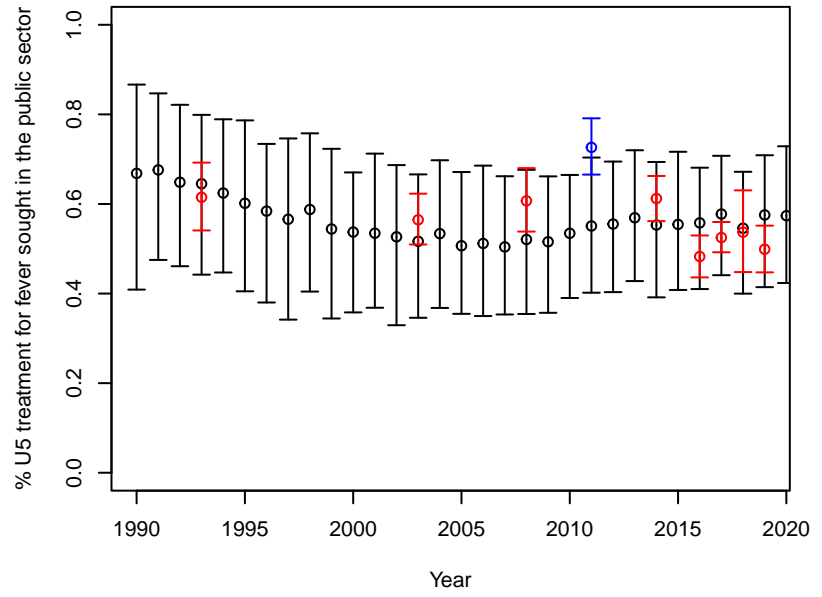

**Western Sub-Saharan Africa: Guinea, GIN**

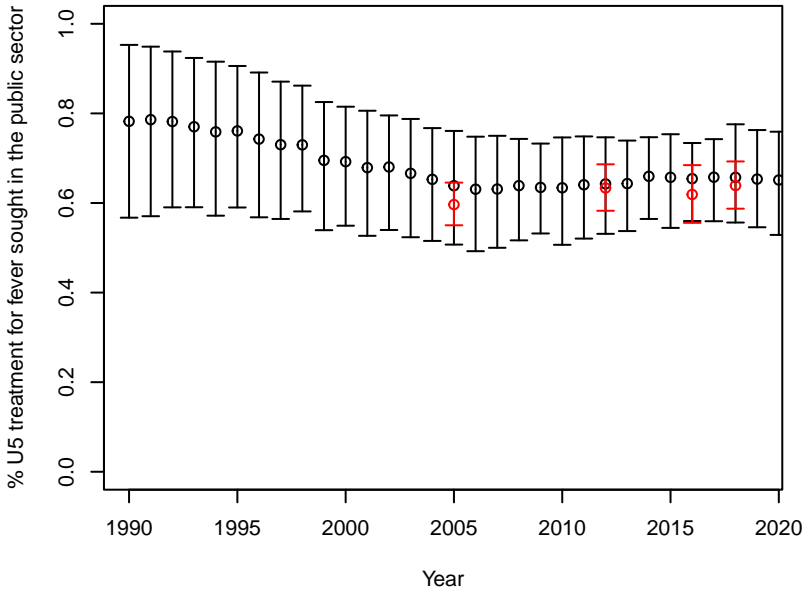

**Western Sub-Saharan Africa: Guinea-Bissau, GNB**

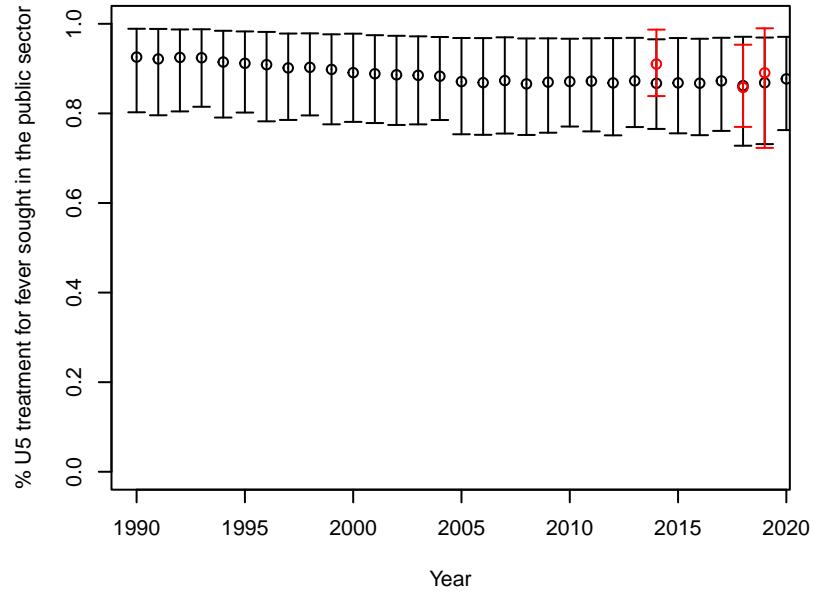

**Western Sub-Saharan Africa: Liberia, LBR**

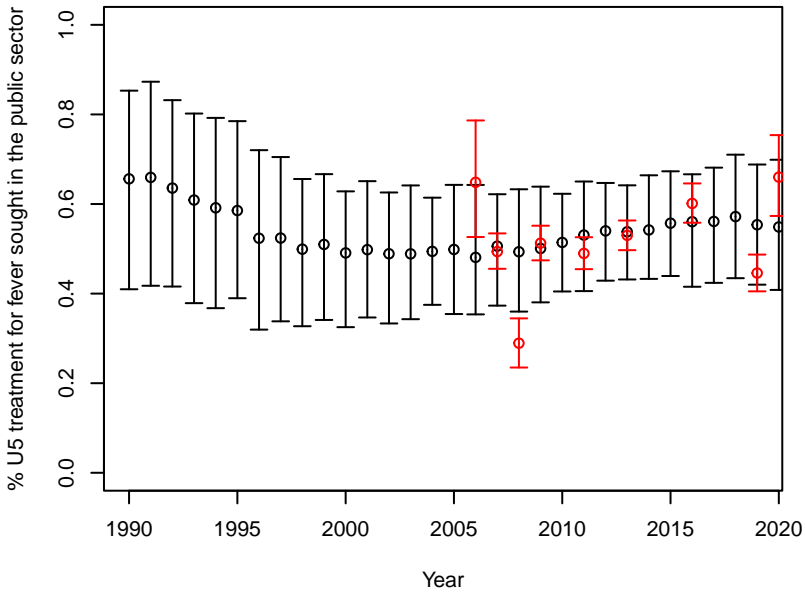

**Western Sub-Saharan Africa: Mali, MLI**

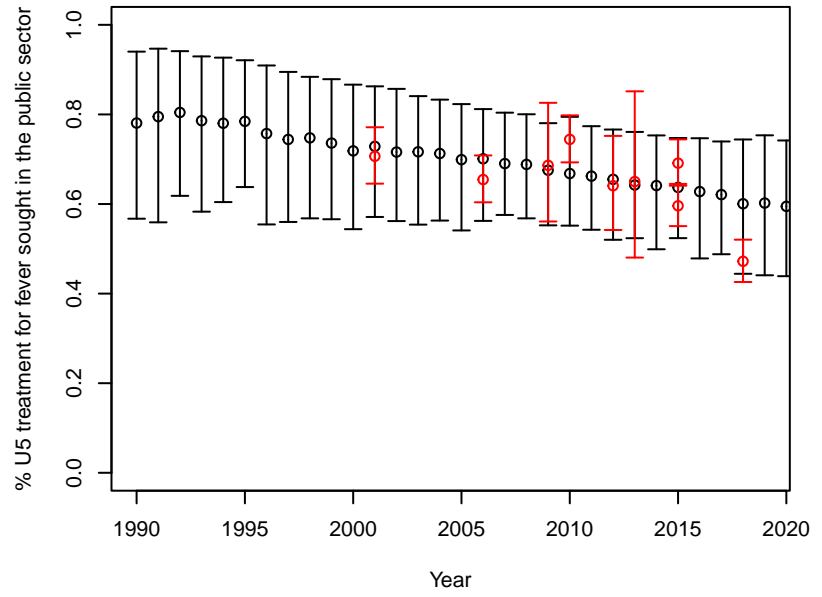



**Western Sub-Saharan Africa: Mauritania, MRT**

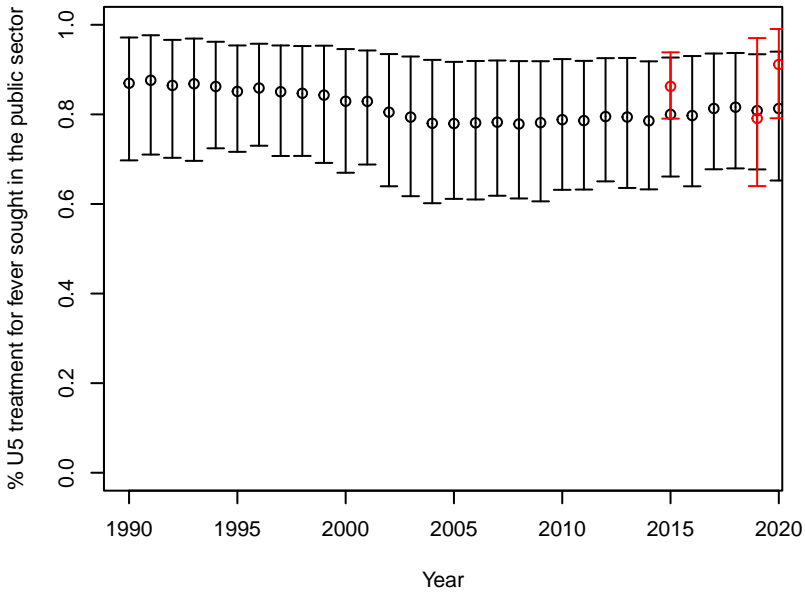

**Western Sub-Saharan Africa: Niger, NER**

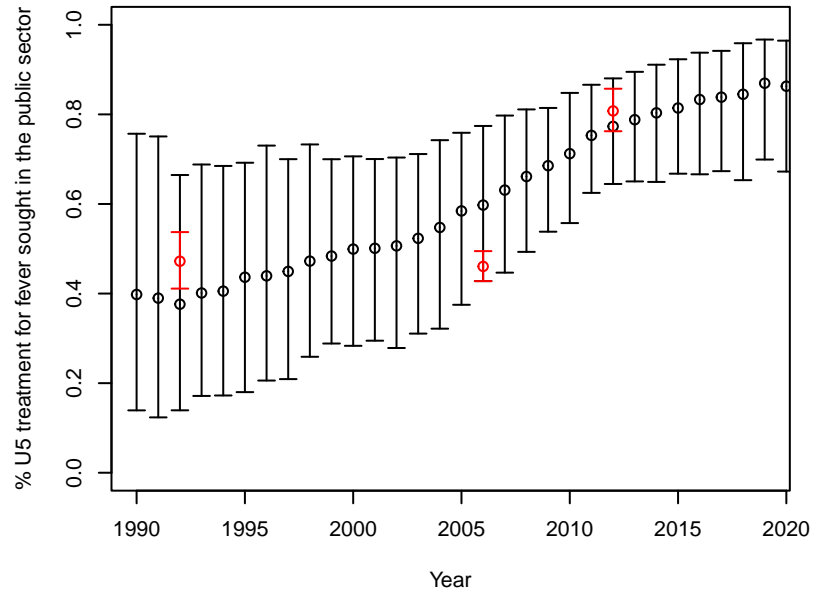

**Western Sub-Saharan Africa: Nigeria, NGA**

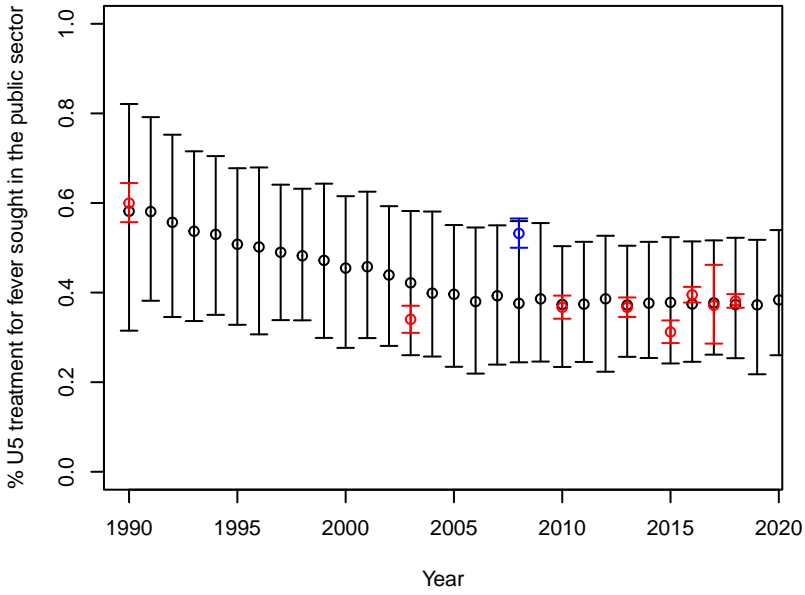

**Western Sub-Saharan Africa: Sao Tome and Principe, STP**

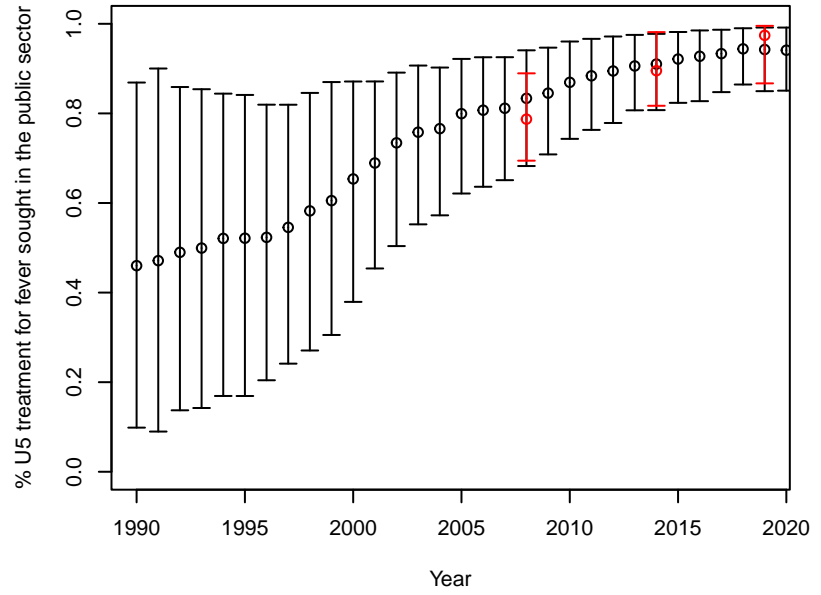

**Western Sub-Saharan Africa: Senegal, SEN**

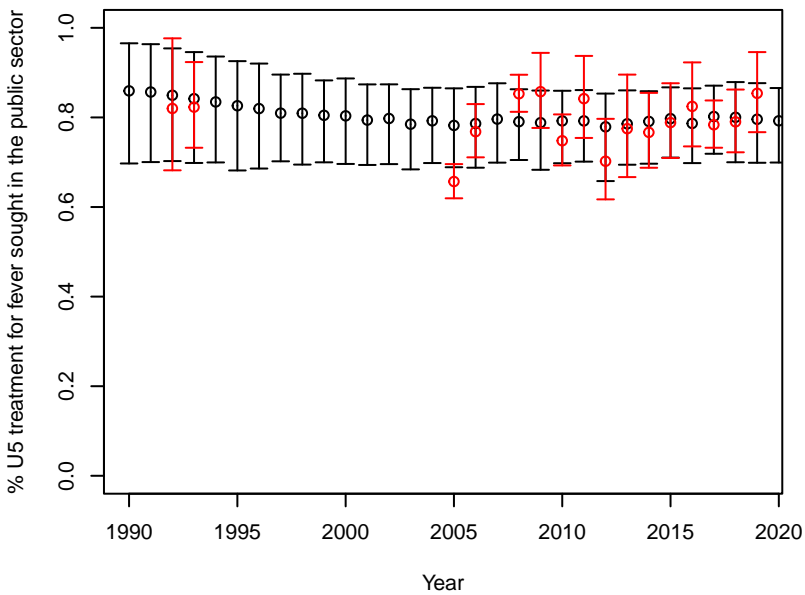

**Western Sub-Saharan Africa: Sierra Leone, SLE**

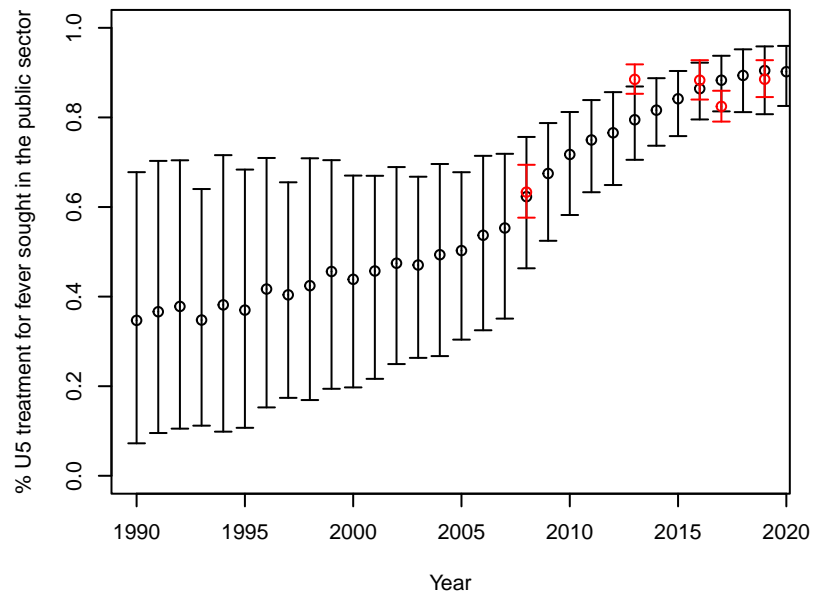

# Western Sub-Saharan Africa: Togo, TGO

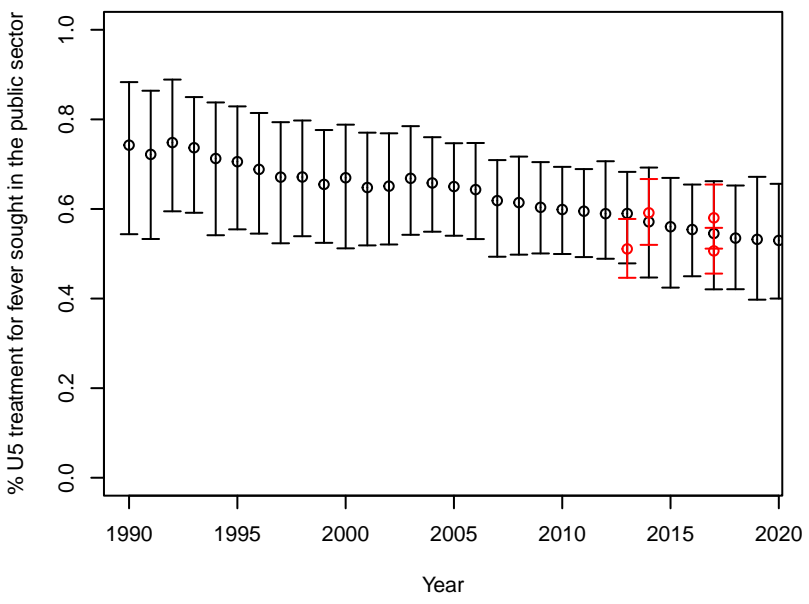

Supplement: pgph.0002134.s002.pdf [file pgph.0002134.s002.pdf]
